# Supplementary material for: Toxicological analysis of metabolites in ischemic stroke based on salivary metabolomics
Source: Front Mol Biosci. 2025 Aug 29;12:1609227. doi: 10.3389/fmolb.2025.1609227 (PMC12425714; doi:10.3389/fmolb.2025.1609227)
Supplement: Supplementary file 2 [file Supplementaryfile1.xlsx]

## Sheet: Sheet1
Number	Metabolite name	Category1	Category2	HMDB ID	Alignment ID	Average Rt(min)	Average Mz	Adduct type	Mode	S/N average	CON_01	CON_03	CON_04	CON_05	CON_09	CON_10	CON_13	CON_15	CON_16	CON_17	CON_18	CON_19	CON_21	CON_22	CON_24	CON_25	CON_26	CON_27	CON_29	CON_30	CON_31	CON_32	CON_33	CON_34	CON_35	CON_36	CON_37	CON_38	CON_39	CON_40	IS_01_2	IS_02	IS_03	IS_04	IS_05	IS_06	IS_07	IS_08	IS_09
1	3-Methylbenzoic acid	Unclassified	Unclassified		Meta_101	4.913	135.044	[M-H]-	Negative_FA	36.69	9162385	1192122	39571779	16860089	10863171	3033485	155641	4559913	464235	1560460	8688368	3953908	2125281	7692887	5658032	2765642	6289322	1439782	2511403	1168103	25194863	6253032	4870752	1191242	5805507	49107387	2386471	11107818	2145766	11993012	343572	6953267	992304	2918980	13557340	3066012	2528130	1624528	61548
2	P-Octopamine	Xenobiotics	Natural Product/Food/Plant	HMDB0004825	Meta_103	1.458	136.076	[M+H]+	Positive	311.42	471132096	556902720	79812512	317657760	125911272	688042240	432951040	564201856	258264720	293190976	576010240	825803072	110128448	1950672896	177741024	586395392	704319616	277781184	380891808	341392352	72617304	490770592	615944832	392039616	642870272	288221568	356634112	21133466	336020256	459973536	109411880	9917954	228312832	66550156	46650228	14682278	259481152	33454936	161081600
3	Salicylic acid	Xenobiotics	Drug	HMDB0001895	Meta_104	5.87	137.024	[M-H]-	Negative_FA	125.62	13059943	12156305	3513571	81260132	49402632	12546562	12385494	17895904	10743580	5938840	32613214	12019304	26986183	7148755	78721350	12211765	7263091	18451667	12735985	10313307	117811236	15725852	66486450	79680734	88409783	18452012	22907492	46122558	20572232	8370458	7260902	26626013	11431008	20868812	30700928	65630637	23912303	7702134	83227546
4	1-Methylnicotinamide	Cofactors and Vitamins	Nicotinate and Nicotinamide Metabolism	HMDB0000699	Meta_106	1.472	137.079	[M]+	Positive	61.37	37611113	44758016	5542707	22238430	10231286	51727396	31763884	45947764	24607026	21268802	43572002	67430019	7884505	155979512	16100574	43798884	55575060	20722149	29468089	25261267	9349779	38612910	48350228	30451795	49739364	20640158	26270399	2182225	26698959	39722305	8103492	762870	20847477	5846823	4499537	1720416	20335057	139398	11906807
5	Octanoic Acid (C8:0)	Lipid	Medium Chain Fatty Acid	HMDB0000482	Meta_113	7.193	143.107	[M-H]-	Negative_NH4HCO3	69.9	4291801	6545454	2313257	2502740	5644412	3083378	2735180	3068846	2388184	3020638	2867728	3433996	3279904	5210033	2546849	3289990	3999452	2454729	2540854	2400440	26977997	2848029	3242000	3133022	3403124	2597357	4524099	5528830	5305999	5358329	1997385	34250155	1766482	3067474	4410885	4331574	2184263	1503504	2631328
6	2-Naphthylamine	Xenobiotics	Natural Product/Food/Plant	HMDB0243964	Meta_114	3.392	144.081	[M+H]+	Positive	29.07	44819637	89275	2657546	28969473	33468422	5677105	2575209	37386207	20522063	3449794	554738	5675643	49153	77626339	21282359	59695289	26118932	1972344	11030154	1362261	2113036	40370252	44503957	6231431	8293246	19487634	4173887	15213712	52742	87192523	177532	2585473	2359750	1371317	12389826	1165894	891248	247618	92577
7	Adipic acid	Xenobiotics	Degradation of aromatic compounds	HMDB0000448	Meta_117	3.054	145.05	[M-H]-	Negative_FA	16.49	2221562	415707	253668	5805776	7053436	3687893	424980	2930786	307159	466618	1527500	685661	193276	6042701	399935	479816	434035	1241772	1821387	1537311	4196301	375367	3354788	2445288	623881	4021378	5500412	2265771	225848	313872	248741	1843481	6393520	2775577	3195381	4690913	3293789	2594363	237211
8	3-Formylindole	Xenobiotics	Natural Product/Food/Plant	HMDB0029737	Meta_119	3.43	146.06	[M+H]+	Positive	42.43	65386104	1468742	3853233	51174702	13713448	7690865	3037927	53870028	29978355	4674389	5465456	7453656	630671	120658405	30619582	85877065	36187217	3353107	13866160	1784556	451471	59397038	65308479	9752745	11837005	3773021	4832365	24329341	7980621	142226881	42597	6245581	2861684	1971065	23857919	2608863	2423032	226559	275995
9	Oxalic Acid	Cofactors and Vitamins	Ascorbate and Aldarate Metabolism	HMDB0002329	Meta_12	0.884	88.987	[M-H]-	Negative_NH4HCO3	27.87	2637635	2899328	167886	2748591	10461859	3550149	2418576	1535793	4321755	797764	2515317	1299408	15330133	2661234	889539	3517851	112434	507692	5955209	1980311	2508961	2384099	878495	1166325	1402622	2513346	652989	1135199	1067549	2703759	1582371	11466656	18638431	4291985	2283123	1075881	1892599	660574	981898
10	P-Coumaraldehyde	Xenobiotics	Natural Product/Food/Plant	HMDB0037254	Meta_126	2.59	147.044	[M-H]-	Negative_NH4HCO3	14	2350772	771376	23494	1142538	4249343	1962464	551587	2410124	1094289	1289474	1274827	2999687	21173	6962728	685457	4901408	6582710	21400	1900728	77989	110921	2384947	2388057	1504351	6883250	237932	376166	65842	1027592	4748262	22993	595056	334529	0	110400	20876	87998	22042	20722
11	Lactic Acid	Carbohydrate	Glycolysis, Gluconeogenesis, and Pyruvate Metabolism	HMDB0000190	Meta_13	0.963	89.0232	[M-H]-	Negative_NH4HCO3	1198.12	26581265	93715417	19266247	72576373	43382336	9060392	22737899	83705532	59028350	21343793	5255948601	121855335	20165114	34015816	34080259	62775462	1909704317	21004999	8524874	18986197	8967476941	45950428	53063001	15006542	14241967	72257015	63207482	59394552	3315302860	21739007	63819523	21856440	8506524054	82721797	96971786	79616955	3794260636	6093023467	10832687
12	Phthalic acid	Unclassified	Unclassified		Meta_131	6.35	149.023	[M-H2O+H]+	Positive	13.6	34551231	14967458	9633357	8683147	37775489	9330318	8487134	19659557	16312650	8310906	7964791	9496942	12128764	11975703	9856176	21165723	13542963	9725267	24350886	12530616	7792780	13434579	13891187	14066111	22436874	10726229	14488401	22430536	12038344	22759422	9740696	24113622	7356293	40985932	45288995	43148880	8303460	6947661	15155374
13	Cinnamic Acid	Amino Acid	Phenylalanine Metabolism	HMDB0000567	Meta_132	2.289	149.06	[M+H]+	Positive	28.16	43043354	14814913	3245787	24483741	80542328	34444492	15642251	37318522	23749527	17976017	35178236	33489434	2599018	123746365	13001035	50197443	54002961	4262320	28395163	6379255	2889933	34532299	44551021	25311612	45175481	28124549	16252856	2985793	16859038	50363582	3725455	11444452	19355473	2299710	5865673	3806942	10378364	185450	53496
14	6-methoxypurine	Nucleotide	Purine and Pyrimidine Metabolism		Meta_136	1.454	151.069	[M+H]+	Positive	32.79	13814821	4860935	5076537	6014010	48332310	3028324	1817045	9216360	7052659	2710813	1470087	1195071	6614950	12097425	3360948	12568093	1245852	5284060	3611459	14347301	5390132	3289295	9658232	2715310	2155977	17200946	5409839	3945225	2004267	18149294	3826121	12739380	9321571	5796415	15491224	7217884	5913368	12768180	2248989
15	Xanthine	Nucleotide	Purine Metabolism, (Hypo)Xanthine/Inosine containing	HMDB0000292	Meta_141	1.016	153.042	[M+H]+	Positive	54.05	3245244	3154102	105698168	76429535	7644335	3360977	36693533	53429716	59733602	5151621	53142938	6499092	21796102	6196132	6300953	3357762	4939593	61385102	685850	4678703	174215526	2709906	8022454	2379621	2485518	150910316	24639006	1923623	973295	477280	49192489	4482114	81569438	45015596	47304590	44871393	134620477	116925480	14001687
16	Nonanoic Acid (C9:0)	Lipid	Medium Chain Fatty Acid	HMDB0000847	Meta_147	7.425	157.122	[M-H]-	Negative_NH4HCO3	630.17	61463001	66271915	56988788	54229576	59712550	59230395	58913397	52039379	52228814	55079524	56687425	59257514	75897164	63284120	54845975	63002851	62099397	56309679	53670882	57346616	61010370	54949044	56055731	59648161	64939507	49156980	62552189	72915576	70695074	70315019	53191154	77684812	49793884	59510129	60219498	64547861	48471304	48562090	57116778
17	1,5-Naphthalenediamine	Xenobiotics	Chemical	HMDB0244231	Meta_149	3.443	159.091	[M+ACN+H]+	Positive	28.21	24931749	1445936	122328	16963222	23100870	5192722	2080247	21963135	11558101	3472842	3847389	8558223	62387	46107320	12110353	34717921	16700793	1129408	6128953	2545083	2887665	22380737	24858465	7470900	5464314	1819344	2276831	9118245	2617908	50856810	580768	1447851	713846	1047780	6974976	48265	6005066	144353	1620638
18	Aminoadipic Acid	Amino Acid	Lysine Metabolism	HMDB0000510	Meta_150	1.361	160.061	[M-H]-	Negative_FA	30.74	9619118	5375688	2438794	13050677	20811884	7789146	4623298	10682929	11221038	2032654	7428670	5041466	4230476	23787140	3377261	6130298	7674528	5548774	8315710	10519792	11856121	6756538	6591642	4995657	16243453	15380310	4742362	4987692	6043226	7368432	2831082	6855640	11446187	4661466	10621510	6545809	12377743	11192800	3944962
19	N,N,N-Trimethyl-5-Aminovalerate	Amino Acid	Lysine Metabolism	HMDB0240732	Meta_152	1.229	160.133	[M+H]+	Positive	20813.1	19093504	6054953	878664	6885867	27092527	5510557	1538783	6093880	8065352	6896695	9483438	3729347	6762921	9405750	11144540	24340440	6537679	12742524	4779636	5078368	2757285	8755574	20159901	6005214	2473522	11039166	14711363	4048378	4426793	16302320	5819790	11693188	19127050	1778008	6417295	10166256	7841505	8531375	5047776
20	Ala-Ala	Peptide	Dipeptide	HMDB0003459	Meta_155	1.209	161.092	[M+H]+	Positive	55.68	7151107	6172993	4174314	3714519	27246171	3612726	29039046	8271816	44317373	3563931	10162741	4668633	7465558	6596619	88448	10355729	7205549	8812762	4430859	1808460	348839	4375692	5574120	4634472	2413045	37832088	6058797	264676	28098118	6287798	2359739	26651597	140055487	26230684	15174524	1269051	10707816	15419859	5887719
21	Glycerol	Lipid	Glycerolipid and Phospholipid Metabolism	HMDB0000131	Meta_16	2.057	91.0209	[M-H]-	Negative_NH4HCO3	25.84	4228065	2507271	3508772	4235791	4475200	2775042	2565880	2037753	4910298	2991019	2546400	2782215	4478028	6253739	3097454	3875325	3568791	3221353	4028756	5908798	3179193	3682175	3622400	3334162	3215450	5040061	3177945	1643746	2667736	2048710	1389711	3346648	4072002	4840483	3065340	3636386	4049947	2574128	2755383
22	P-Coumaric Acid	Amino Acid	Tyrosine Metabolism	HMDB0002035	Meta_162	4.868	163.039	[M-H]-	Negative_FA	40.93	20337990	8056522	11756560	39379344	40945784	19530410	7426864	15178571	1889635	12359213	33089490	17286134	7331895	27476838	3696080	13797342	19361198	9632875	14949329	9943750	56402192	12366933	22056870	14980867	4977078	15332485	16347639	6575708	10443605	4327867	2887418	44945384	4319160	18999966	11044954	7981354	17446124	7905326	3187593
23	nicotine	Xenobiotics	Tobaco Metabolite	HMDB0001934	Meta_164	1.323	163.123	[M+H]+	Positive	1013.98	4705016	9332585	6410525	3876877	4947561	2971610	3069686657	2185886	7532683	2698609	368444759	1969380300	67097736	16956945	3544578533	3456196	2162727	28409502	1612352	5685402	43314866	706268	2954594244	12820264	124578	11869486	390318614	3613221	7642297	293293	502690772	488896868	104256114	23040719	30891574	68230420	4554391957	64584732	34937406
24	L-methionine sulfoxide	Amino Acid	Methionine, Cysteine, SAM and Taurine Metabolism	HMDB0002005	Meta_169	1.441	166.053	[M+H]+	Positive	18.24	33628116	27860142	10222184	18731480	9476067	37284904	23596082	33603984	31660860	14573785	34812808	47660512	6820080	118193792	8957498	49578552	37141112	17935156	22941814	19504806	12624733	30025416	38973688	22359252	34666288	29982148	19522850	371845	19320344	36811048	6057918	11768490	19698944	3690093	27694600	599827	14730424	1823883	9745286
25	L-Phenylalanine	Amino Acid	Phenylalanine Metabolism	HMDB0000159	Meta_171	2.292	166.086	[M+H]+	Positive	8889.02	4983916932	1788931015	404904166	3135340091	9073121340	4123699446	2012333291	4535631734	2817820670	2076996770	4235181051	4127429187	298556791	14762544344	1625472641	5983811924	6738570857	487511902	3583376663	812008765	44136481	4202170599	5258702375	2966786559	5438453526	3336252589	1966892962	442560251	2135402040	6235266640	457633308	1451655499	2303628507	300944523	681783206	470814319	985619587	78869767	123981574
26	2-Aminopyridine	Xenobiotics	Chemical	HMDB0245026	Meta_18	1.173	95.0609	[M+H]+	Positive	28.11	25339632	19899114	5106556	65441488	69713864	19378526	36384276	11848944	25380206	11405641	119486232	38183472	6223817	33602916	93853640	18841164	41256444	13963625	10749823	10136742	24166822	18337146	53911348	10989740	105241088	30777932	22930496	15405781	9241077	21957134	8659964	24767826	41307332	9806009	55603768	17840004	37363840	39023844	9246656
27	Pyridoxine	Cofactors and Vitamins	Vitamin B6 Metabolism	HMDB0000239	Meta_180	1.43	170.083	[M+H]+	Positive	108.41	6738011	2680939	6872512	413716388	923168687	8856484	4245518	6814733	7253786	7580965	13216149	1795474	6391685	2622794	2052828	4274889	2145894	7823319	4096757	6038755	27934814	3549057	4266923	4152984	601049	10501600	4886201	3559901	220959	1015034	4624228	3219275	6701596	7925709	3371783	6367945	7323180	12870591	4776358
28	1,4-Cyclohexanedicarboxylic Acid	Xenobiotics	Chemical	HMDB0250649	Meta_183	1.07	171.066	[M-H]-	Negative_NH4HCO3	36.75	67646	1027505	20713	1957566	95349	5079165	2571836	6954295	717985	2853385	2274137	3753908	0	3906104	186178	481757	5825334	0	6772819	1926167	2048040	7493035	1591537	2963701	2547900	544199	613253	271397	3697340	72325	884664	21271	493915	22759	23540	17152	155174	49166	850139
29	Decanoic Acid (C10:0)	Lipid	Medium Chain Fatty Acid	HMDB0000511	Meta_184	7.589	171.138	[M-H]-	Negative_NH4HCO3	79.63	4507697	6826638	3051569	2685728	6272975	3375220	4298841	2444373	2587239	2748793	3072659	3115051	3759984	4507706	3080615	4423594	5485832	3839688	3020369	3181096	4352597	4622951	2840684	2958246	6635845	2665279	3362102	6004600	5760224	5016058	3087570	30246197	2296370	3812830	2911955	5777956	1927108	2031804	2331669
30	N-Acetylleucine	Amino Acid	Leucine, Isoleucine and Valine Metabolism	HMDB0011756	Meta_185	3.559	172.097	[M-H]-	Negative_NH4HCO3	137.07	9930787	3080284	156908	5136847	49934717	3169700	1731126	1889678	7679959	559032	5971801	10155390	943569	91714492	17019182	21710510	9488460	596057	3113962	858107	0	7904960	12844970	2031200	65368776	3693987	3687064	4295927	18054031	11921209	68743	1350898	2479688	1937795	10886152	2697473	833454	50557	165369
31	N-Acetylisoleucine	Amino Acid	Leucine, Isoleucine and Valine Metabolism	HMDB0061684	Meta_186	3.301	172.097	[M-H]-	Negative_NH4HCO3	36.23	617683	1024218	0	1192551	3488717	414104	58648	627896	229041	24089	1025418	761648	0	6286414	686839	3120554	2683307	37383	688942	271230	1531510	564539	1670810	592920	6188066	330400	225724	963149	1406847	2891225	26218	28836	163984	21669	1947620	71459	20577	0	0
32	Aconitic Acid	Carbohydrate	Citrate cycle (TCA cycle)	HMDB0000072	Meta_188	0.836	172.997	[M-H]-	Negative_NH4HCO3	109.36	34409	7575645	329272	2086335	394974	5215229	1706703	848601	2978434	9741378	16765522	6285178	1523108	7059508	210721	24671	510531	34953	1198440	5647538	47918130	935476	866208	5701309	339453	2767298	1893741	812352	6807229	230119	1107912	109836	41189335	34233084	1549070	387827	3259204	2679854	2253156
33	Suberate (C8-DC)	Lipid	Fatty Acid, Dicarboxylate	HMDB0000893	Meta_189	5.361	173.081	[M-H]-	Negative_FA	34.1	7347905	5715956	1696929	18053145	18896301	4523199	3025066	3363487	4810473	1343172	6442029	92075	4019554	10554555	2261384	4069177	3005140	2575571	4627330	2923617	16103658	3732199	7089870	4094999	14999122	8176128	8127493	3883565	2347645	7937875	2043871	3345322	13292729	4834023	5295506	6864448	12106106	3759500	38946
34	Propane-1,2,3-Tricarboxylic Acid	Xenobiotics	Natural Product/Food/Plant	HMDB0031193	Meta_193	1.371	175.024	[M-H]-	Negative_FA	58.5	7507498	4751179	1747906	33119504	9352361	7390564	6685692	25002172	8706929	4573918	24363094	13999784	3317759	20839296	6700126	8744279	15876726	2470726	4194265	6531657	33139302	7121790	7442596	2401604	47923076	6441104	3957278	6889730	23799376	5932935	2767126	4916629	151692544	3394304	4703173	2993342	433770112	14455707	4825402
35	Gly-Val	Peptide	Dipeptide	HMDB0028854	Meta_197	1.574	175.108	[M+H]+	Positive	57.52	12470520	24286503	3507572	6502564	29414256	4973497	233176	14745412	41096580	4275733	797776238	1685647	1411494	32732575	1566083	38028770	21597239	886215	8751378	1813676	664746	10719002	17897022	5022057	12626367	42933853	9264530	6146548	12452350	10436585	1147407	7209289	12253958	113787	548533	736584	450419	827918	2597823
36	N-phenylcarbamate	Xenobiotics	Chemical		Meta_206	6.282	180.102	[M+H]+	Positive	19.53	10155485	4557761	4182050	8890495	3804117	10356427	6346583	4556746	5383098	7764202	7312480	6657069	7632434	12697061	4647747	5561099	6354843	3702427	5867010	7984635	9771381	6442080	7630170	8332372	5667181	10871050	5941948	3109718	4751392	6053790	5498632	5087055	9984601	4804204	4118184	5123302	9507580	9508860	5827201
37	Mannitol/Sorbitol	Carbohydrate	Polysaccharides and Oligosaccharides	HMDB0000247	Meta_211	1.002	181.071	[M-H]-	Negative_NH4HCO3	87.99	19334	36740	116537	107610	137621	23540	164505	13217	356560	36792	1151804	55229	73130	38294	31185	69138	0	45512	25600	24424	15090194	78963	15192	24110	203698	255873	95432	21376	157610	10923	154786	0	71198843	741839	17023	306188	31972	1221105	0
38	Saccharin	Unclassified	Unclassified		Meta_212	2.867	181.991	[M-H]-	Negative_FA	2611.52	4316166	32256004	137934	54186000	467136256	2717455	790200832	2388534	2580299	2300579	6273508352	2277817	3783118	4000550	1353590	956450	2726809	2243502	1713957	657793	39801278464	3782483	1085205	1801135	7443709	4688565	4024026	72773360	1345568	1587237	4949606	2310114	6164062	904067	3666314	560797	1671508	478331	618227
39	L-Tyrosine	Amino Acid	Tyrosine Metabolism	HMDB0000158	Meta_214	1.465	182.081	[M+H]+	Positive	1545.4	1525541248	1836845824	262315328	1061032320	332964672	2350860032	1407904896	1869579648	769168256	911380352	2048583808	2856780544	383975360	6796237824	605668992	1867823232	2416915968	938073856	1340064256	1149551104	558464960	1628761088	1980205440	1316675968	2273924352	805734848	1137916672	58139088	1246115584	1561026432	376867104	21376416	695584448	222920256	162305040	25397944	855111936	80981968	596894976
40	Isovaleric Acid	Amino Acid	Leucine, Isoleucine and Valine Metabolism	HMDB0000718	Meta_22	1.752	101.06	[M-H]-	Negative_NH4HCO3	1408.96	1616834055	86146961	22289225	750993496	1244394293	600457440	88955333	1080998462	16228727	595876631	186140558	250124509	22386928	2705549238	733766023	1147532083	1161265378	117745714	720994903	249492919	223276243	998994462	861632778	362310136	704054159	20098257	391719816	4080640285	408054228	3893230708	90089453	1826315411	19029701	74532576	825106640	128898108	4365884	939327	47127627
41	Undecanoic Acid (C11:0)	Lipid	Medium Chain Fatty Acid	HMDB0000947	Meta_220	7.731	185.154	[M-H]-	Negative_NH4HCO3	17.34	2044377	1052073	623969	742058	804554	634737	846183	633887	880142	814852	1085370	492449	674718	1491141	752498	1500443	1377591	795101	783421	730489	958097	1232219	633210	556425	1398727	535840	731127	3140632	1184058	3064887	709224	1905034	327035	728336	618832	1260711	429831	479625	630557
42	Azelate (C9-DC)	Lipid	Fatty Acid, Dicarboxylate	HMDB0000784	Meta_224	5.838	187.097	[M-H]-	Negative_FA	263.86	53007748	41294268	9357313	130315080	137691872	21136482	17785040	15450017	39192896	8254058	26635008	20444042	34585092	37271656	12952418	44361792	16157184	12158449	22110038	21600676	36599868	29575686	42493768	15245263	27548140	52022704	47053844	19438500	11224000	36031192	9768819	23259992	41561800	37661292	43920840	40811564	51835864	22981032	6635204
43	Ala-Val	Peptide	Dipeptide	HMDB0028700	Meta_231	1.603	189.123	[M+H]+	Positive	10264.7	37112211	25252035	4233897	15449111	137451573	83720445	6693133	38085945	97276508	9569950	10289600	7754826	2670492	69210649	3313175	49448711	28078150	7356452	18978807	30691294	12730621	12238314	19072746	83522554	33228690	19654202	15875959	23404933	18335253	37658513	366467	4678694	8300107	1005701	4073740	2295226	6920048	511946	723722
44	Gly-Leu	Peptide	Dipeptide	HMDB0000759	Meta_233	2.89	189.123	[M+H]+	Positive	7232.39	12045875	774537	3570844	18803805	107231636	9310684	3562321	28515451	47323762	9403300	3586423	1669203	982444	102977971	1855772	39012299	31488645	48834	11552474	2208638	0	18008929	20091192	10775996	6886367	87517388	11262372	10330123	5603687	14313592	175729	1753691	27056915	764764	1730034	956583	35624	369157	63892
45	2-Hydroxyhippuric Acid (Salicylurate)	Xenobiotics	Benzoate Metabolism	HMDB0000840	Meta_241	4.951	194.046	[M-H]-	Negative_FA	23.68	0	0	0	24096	42209	0	0	0	19909	19666	91661	0	39406	21007	6563761	0	0	21295	19027	42519	221699	34090	4392092	32270	29818	23560	27803	0	4482484	23058	26247	0	230908	68177	18710	1698781	1277675	23913	881924
46	Azacyclotridecan-2-one	Unclassified	Unclassified		Meta_248	6.285	198.185	[M+H]+	Positive	1166.51	10309040	7188191	7874116	12544058	10918810	12231687	8148704	8874226	9152497	9007360	9871710	7770253	15213580	16648290	7450410	7699815	7422372	9171426	9754726	9973664	7217849	8963145	13492542	12758733	8243590	12460033	13075277	5306866	8373587	7946582	7893496	6563664	20251248	10096524	8001709	11318791	10916586	13135449	7106078
47	Dodecanoic Acid (C12:0)	Lipid	Medium Chain Fatty Acid	HMDB0000638	Meta_249	7.875	199.169	[M-H]-	Negative_NH4HCO3	144.42	8414719	7488764	4988331	3078165	12865431	4613580	4253226	4523766	10083706	6127740	7040519	4667459	5983909	12942556	6716364	4941367	4534688	6704613	7583644	5001907	9907060	5438870	6974310	4853471	5635042	4049120	3537481	12348475	16920306	8082879	6148727	31839271	2789053	5290578	4604319	6978037	6223172	4446779	8911236
48	1-Aminocyclopropane-1-Carboxylate	Xenobiotics	Natural Product/Food/Plant	HMDB0036458	Meta_25	1.233	102.063	[M+H]+	Positive	26.7	228617888	57698988	48190312	201421040	141526256	156052576	77292560	163724896	80714680	105887824	116690568	149671552	64751664	311622464	81080184	123344488	291063808	91413032	159262256	93750176	48906852	192916432	138348064	103343816	212314096	113235824	121517704	288344288	146212544	196374800	72034800	71632384	128134272	82463896	140245104	79821848	148221104	120704544	53842452
49	Sebacate (C10-DC)	Lipid	Fatty Acid, Dicarboxylate	HMDB0000792	Meta_251	6.074	201.113	[M-H]-	Negative_FA	52.39	7191765	5850561	1000197	15220441	17969162	3316038	2504487	3555254	10708710	1405531	6681159	3540019	3710420	17151117	3006501	5367362	2793049	2712954	3551949	3513288	7066724	6308358	6065035	2810017	6292445	11516630	4673413	6537065	2587043	12517351	2122019	4824645	5157327	3402606	6094237	4066620	4290244	2497012	1251357
50	Ala-Ile	Peptide	Dipeptide	HMDB0028690	Meta_252	3.02	201.124	[M-H]-	Negative_FA	39.69	14296191	556210	1062355	5133247	47597180	2591576	1074633	9316701	39736136	4420384	628906	464380	629864	17858244	630438	19740530	10922836	445971	2522700	1530879	15328	5905864	13641997	2012395	3017981	67309792	3835578	5901588	1560920	5286442	0	1045092	36912244	66432	454274	723408	0	0	14767
51	25-HYDROXYCHOLESTEROL	Lipid	Sterol	HMDB0006247	Meta_253	1.352	202.18	[M+H]+	Positive	60075.7	31176848	22710720	40396941	28196509	46204557	36508443	22861887	28518255	25468302	29331075	14288770	13665630	49536207	35445279	23398183	18585361	10556358	38243686	33486835	46660981	11307212	21484104	32280433	36151107	11155090	56515030	33238554	29882412	14165616	16237824	41608663	50676861	34311254	50758350	19273020	57892452	40322037	46834643	32584068
52	Ile-Ala	Peptide	Dipeptide	HMDB0028900	Meta_256	1.73	203.139	[M+H]+	Positive	25346	65152644	10312592	8487742	34446512	319442944	167552768	29889956	127949624	178047744	101956064	13464964	27868512	2304960	148477472	7865096	96537512	101855632	2412431	92226984	22556646	6983868	40596680	51918852	100769840	27219206	200390240	31174508	38691568	63490056	44499664	2022097	7733703	114713568	1161618	6827992	5630092	961464	436043	2908628
53	Ala-Leu	Peptide	Dipeptide	HMDB0028691	Meta_257	3.025	203.139	[M+H]+	Positive	115.68	84043960	5114210	6432164	27371040	230678096	15202655	8009436	48893720	231436240	30056732	8727324	5432806	4802773	55180276	5370315	135150144	62397864	2657110	17099174	9301137	478102	41426704	73861728	14858779	23782886	199777504	22500602	43688184	12974341	44718832	277924	9435652	143038176	589766	5264025	4127949	553099	393772	184698
54	Leu-Ala	Peptide	Dipeptide	HMDB0028922	Meta_258	1.75	203.139	[M+H]+	Positive	210.19	63395792	16970788	8487742	32491428	305469504	164194848	29357736	125909696	178008000	102536336	13416202	25777178	2297572	142060832	7574967	96078064	100502480	2399082	90533560	20704624	7874556	39867036	50519844	98972512	23937378	198659024	30763294	37778388	60339368	42680520	1879509	6624634	109902160	1040433	3668876	5042000	653350	344289	2509458
55	Hydroxypyruvic Acid	Amino Acid	Glycine, Serine and Threonine Metabolism	HMDB0001352	Meta_26	0.874	103.002	[M-H]-	Negative_NH4HCO3	228.84	9276538	10817760	1755840	14378427	6298152	3007788	3097614	3655692	6162746	280248	12778180	2130334	15064205	3705344	1291197	5378327	3924293	21761769	2584914	1963970	5099318	2028091	3641636	703064	3599991	4942538	1969970	5210042	17724317	2711642	898633	271059081	13859405	12255219	5783299	8696876	2312492	6006607	3626584
56	L-Tryptophan	Amino Acid	Tryptophan Metabolism	HMDB0000929	Meta_262	3.434	205.097	[M+H]+	Positive	436.15	555611968	12934631	34829600	404118880	461288768	80910320	30819604	514206368	235294528	42186136	36749520	74197032	7643035	1032847104	273079072	696582400	357269728	24648316	151819584	15165321	17514496	519613728	554226304	102805288	97614664	251577360	35986760	193668384	69807264	1146358528	2634450	35989136	20881746	18562840	190375920	16322396	6755036	1571269	5859127
57	Ser-Val	Peptide	Dipeptide	HMDB0029052	Meta_263	1.542	205.118	[M+H]+	Positive	74.92	22497561	11946303	5562847	5552176	37421732	19463085	6694334	55983846	62506571	23362741	2611994	1781330	1118701	29388249	1246792	36535343	23741618	791681	24370293	5138252	166468	15684154	17300643	22826061	632440	65388781	12963363	3815030	7331776	9854691	185702	1459517	28010093	8948598	351303	1073272	50682	208214	9285302
58	4-Octylphenol	Xenobiotics	Chemical	HMDB0246557	Meta_265	7.967	205.159	[M-H]-	Negative_NH4HCO3	5.75	130065	102460	23227	25658	45653	24706	57637	49683	42024	53508	76344	111141	28386	28911	26791	43232	98940	32493	36703	33889	35510	45281	86947	37319	33282	30508	33178	74885	224232	85291	26353	107539	117596	24326	0	62218	91192	26163	27766
59	Malonic Acid (C3-DC)	Lipid	Fatty Acid, Dicarboxylate	HMDB0000691	Meta_27	1.27	103.003	[M-H]-	Negative_FA	115.46	15468030	8289430	6616704	61841556	12331991	10415427	8411796	10449606	9159686	6498616	10634297	9073835	14473567	14901862	5030164	8230271	10822100	11151818	8599479	11850112	12277501	8773355	6437417	8156812	10649925	9834965	7762887	5005537	10340598	7889810	6776540	55532080	23146114	12961754	6667960	7160160	8506924	10418750	7483528
60	2-Hydroxyacetophenone sulfate	Xenobiotics	Chemical		Meta_275	3.4	215.009	[M-H]-	Negative_NH4HCO3	2.25	16343	28304	22961	0	24422	50409	73993	34717	18654	46948	25879	23612	22309	27365	18458	30372	29037	22413	49952	26143	44386	25842	26800	22274	50740	26715	68307	54090	42564	35752	32293	51800	18613	48929	19913	56746	30237	23317	45247
61	Undecanedioate (C11-DC)	Lipid	Fatty Acid, Dicarboxylate	HMDB0000888	Meta_276	6.239	215.128	[M-H]-	Negative_FA	57.52	6495319	4691757	1000227	10006479	11238456	3063065	2325748	2604361	5078423	1000006	3996524	2300479	3263297	12625343	1817707	4324206	2415867	1809068	2993811	2906934	1887841	4602541	4720957	2155805	4920159	5822903	4655126	3204278	1585687	8301019	1203706	5151711	4138755	2895149	8409193	3757377	3640245	1679444	1272946
62	Val-Pro	Unclassified	Unclassified		Meta_277	1.809	215.139	[M+H]+	Positive	45.21	16712199	23030684	4088479	214545728	28445276	90238872	65134972	71222824	42243376	29568722	87074224	140709856	3968750	109643800	8214749	30254476	216058448	1866427	84798392	55959992	18783452	77087152	48760312	68645768	59367520	55055936	26565560	27023274	26782994	15860032	6559364	2223836	99251480	2632419	4557230	4139325	7370584	2492158	3283786
63	Val-Val	Peptide	Dipeptide	HMDB0029140	Meta_280	2.029	217.154	[M+H]+	Positive	27.89	26473637	874762	4701099	12525196	94730507	6566455	2815390	17896412	84758365	8850050	2043843	484887	2147643	49601365	2245830	60197589	24851842	1810302	7574338	3829664	102055	10740003	29822901	6990514	4163933	105935100	15904391	14035327	5221471	23654491	130058	1597825	52077678	666722	2334681	1761362	51738	852941	147158
64	Gamma-Glutamylalanine	Peptide	Gamma-glutamyl Amino Acid	HMDB0006248	Meta_283	1.139	219.097	[M+H]+	Positive	19.4	1356323	0	1575789	3232299	504381	837710	0	804925	170191	74258	0	342361	0	317611	0	11505	271134	20465	253774	116248	273212	97191	0	606204	683129	296487	307267	0	176588	144184	0	73441	812118	3673776	0	89438	3931665	3337301	0
65	Ser-Leu	Peptide	Dipeptide	HMDB0029043	Meta_285	2.814	219.134	[M+H]+	Positive	106.1	43421944	3617003	10574486	28740874	150938752	127235208	26179960	130798320	249085312	108554152	16419718	30559378	2921478	159010080	6474012	123144312	204464064	1856680	74909552	14221188	6860496	52086052	62378764	71834968	20938400	248479792	34571936	40860996	72627912	42209168	1718174	5988662	114162288	1258557	2019493	3229638	379306	585975	1556644
66	Pantothenate	Cofactors and Vitamins	Pantothenate and CoA Metabolism	HMDB0000210	Meta_286	2.435	220.118	[M+H]+	Positive	134747	2353978	1005659	0	9596854	156088864	729255	0	0	25716530	0	186546	0	941353	3560934	2482682	2298276	94593	2182172	0	42387	3245214	128547	3016212	0	9722888	24547336	1425879	6319235	449533	1910911	0	54924436	1432922	21271388	6648385	836888	3872169	3253401	0
67	Phe-Gly	Peptide	Dipeptide	HMDB0028995	Meta_291	2.749	223.094	[M+H]+	Positive	81.43	14446936	6101621	3124374	102064488	75925544	45181208	34339988	50083436	20878694	35921500	17517146	12318145	369396	93599712	4899971	40404896	61156660	434122	27965304	14954185	16304854	43301008	33222806	35926996	24036130	22634280	17456064	7021074	13212184	13272459	3130440	409381	14766896	1030528	253128	931566	6149112	407807	2143913
68	Gly-Phe	Peptide	Dipeptide	HMDB0028848	Meta_292	3.534	223.107	[M+H]+	Positive	55.42	22813694	767533	2378206	28100150	63827176	9741169	4105116	68563072	67773592	8198542	6915816	1759458	667329	73981368	5165173	80395976	27868754	381390	29987826	2486685	10688135	23043762	54718840	17024934	13702687	58827112	11658556	16405183	6926981	15244932	561008	1790818	16429954	564005	1466761	682787	376316	289054	1064647
69	Cadaverine	Amino Acid	Lysine Metabolism	HMDB0002322	Meta_30	1.057	103.132	[M+H]+	Positive	108.55	256321584	68742712	24234536	69923576	65526532	71366328	36382656	70754864	53303152	31736716	60222504	212759344	4675925	440940768	52016428	222634896	115099920	55192832	25238242	11621698	22693406	72469152	142090512	20751214	154948672	76912944	32003864	199773824	80878816	69769368	18681176	102307112	93879072	127119016	151501840	112436640	17710104	84754392	25539304
70	Pro-Hydroxy-Pro	Amino Acid	Urea cycle; Arginine and Proline Metabolism	HMDB0006695	Meta_301	0.943	229.113	[M+2H]2+	Positive	29.42	3305810	2275212	114843	692654	199037	25314291	1678445	12044408	501847	20852383	2697785	5593263	0	12213795	94122	4162630	36602228	335112	16031107	8763600	80968	9234850	2733824	12490456	1920819	1303905	1337249	255610	7496137	131160	0	0	2541127	630410	0	118081	299734	139242	6609785
71	Dodecanedioate (C12-DC)	Lipid	Fatty Acid, Dicarboxylate	HMDB0000623	Meta_302	6.382	229.144	[M-H]-	Negative_FA	70573.1	8522329	5226882	931155	8784772	15265924	12879952	2167268	3655268	14052858	1664441	4163564	5305888	2800761	15176143	2643857	5141625	5222952	4442488	3134077	3130369	2258092	8109568	5163103	2623943	9982320	1938900	3965370	3701388	3610413	5982785	1418841	8893802	4362324	3029098	6064067	3435910	4011011	2412859	1111325
72	Val-Leu	Peptide	Dipeptide	HMDB0029131	Meta_304	3.66	231.17	[M+H]+	Positive	2222555	209457744	23977830	26064924	54669404	399533664	358916672	56871020	165540832	431004960	300320736	62760172	44253104	11401935	127101672	16740784	351305376	624680768	7418653	74308968	44831328	8073602	117247984	189475104	115139344	61863332	246131984	91527992	109386376	64548676	135326528	2911444	18185920	129096512	4392810	10846114	13708810	968961	774042	3436387
73	Thr-Leu	Peptide	Dipeptide	HMDB0029065	Meta_306	3.041	233.149	[M+H]+	Positive	4755.51	74288592	4674334	12747303	19015596	98851024	21847534	6763799	43397508	195372016	29380196	5652462	2363446	3698531	73413576	6010984	139845904	56751092	1089551	17248424	9308093	1769117	31951576	69728616	18019548	16871164	146609632	30785378	28290374	14158256	50368904	275499	4332135	66576488	586292	1560227	3683649	236836	873316	630178
74	Formylkynurenine	Amino Acid	Tryptophan Metabolism	HMDB0001200	Meta_307	1.998	237.087	[M+H]+	Positive	17.41	5300777	53403	596067	2229853	7198077	534356	691936	2343478	5045327	502671	833937	88226	63184	1580000	146562	573241	469300	378305	202583	216640	499219	564607	1596888	513236	103986	5297796	2000340	301080	179576	2523722	0	1723048	13291830	2408005	4018662	3006053	1325026	467498	189288
75	Ala-Phe	Peptide	Dipeptide	HMDB0028694	Meta_308	3.627	237.123	[M+H]+	Positive	38.86	30420830	92567	1043174	12291368	24303290	2119954	1255006	14110271	56738518	8514883	2720430	306180	43347	12044040	2086305	26947636	12352675	383154	3277828	1768297	216302	7687254	14639620	3038999	5694944	4255792	5313838	7358469	1572609	8856731	0	1064566	36589200	0	962007	864556	23442	25280	0
76	Gamma-Aminobutyric Acid	Amino Acid	Alanine, Aspartate and Glutamate Metabolism	HMDB0000112	Meta_31	1.196	104.071	[M+H]+	Positive	49.9	66498101	98630347	10639472	82075221	126194928	56005348	46408143	60675790	170939922	26322059	153650116	57037398	26994078	55162867	44868358	68746855	78819594	67518703	37398502	33985688	100045201	35343411	50724849	30069275	299121539	135559908	42743188	49558561	172919401	123256679	12552109	48082356	121499753	54883468	90724811	14520018	31304266	385511206	17876841
77	Gly-Tyr	Peptide	Dipeptide	HMDB0028853	Meta_312	1.726	239.102	[M+H]+	Positive	92.35	22752698	12278848	7536642	46566728	15667598	184735952	127032600	93888904	34792588	101507208	117534592	67405904	2878837	105311440	8719050	49074612	138268928	1853322	51819312	39672088	15190844	52211396	75631424	106497952	40118788	40200300	81213520	6430377	53135992	5213925	13115831	40572	19229228	5204419	668494	1552103	9899872	4272024	9988753
78	Pyroglutamylisoleucine	Peptide	Dipeptide	HMDB0341381	Meta_315	4.615	241.119	[M-H]-	Negative_FA	1630.4	1222643	272887	215776	5780938	35220302	1148574	66292	1838495	1435417	1544858	83594	17070	289971	160104876	121397	3722982	1831887	57485	1452072	223804	450713	2416029	2839800	1624892	901367	6894725	4941570	1176157	615490	2160330	455639	15240	3663734	58523	0	516392	784011	326740	0
79	N,N-Dimethyltetradecylamine	Unclassified	Unclassified		Meta_318	7.681	242.284	[M+H]+	Positive	257643	3859638	1274876	157385	6288669	14499218	6285474	389823	4070260	2257116	1755765	357449	1183429	775860	16254461	529734	5371429	1519203	302198	6630206	2781855	4342541	6752270	2936466	3960988	3237462	1823887	982409	3178842	2292094	2914322	311599	1764230	361547	815164	310194	1221347	424858	393066	284829
80	Lumichrome	Xenobiotics	Natural Product/Food/Plant	HMDB0254199	Meta_321	5.783	243.087	[M+H]+	Positive	28.57	6103243	5367741	392333	4430415	16033425	3663371	34474	1384173	9672968	712998	3074637	1299394	8374313	31555487	1754032	6439811	1043406	7450586	850104	3466451	1496410	7583773	3139980	1149063	6818276	6362718	3044272	17243688	5614062	4988753	944849	15772626	5074376	12255865	9663160	4971936	3659037	194318	2294359
81	His-Ser	Unclassified	Unclassified		Meta_322	1.026	243.109	[M+H]+	Positive	20.52	955410	1139212	0	1241326	1120643	11678987	6700053	5010243	2154930	4335608	2990031	6333957	54534	2896341	101052	4299586	8220535	17296	2998226	3157530	454003	1637850	3694543	5502440	3208782	2887015	3146816	369557	2253826	580064	261965	198223	102849	150959	150021	117271	0	0	426015
82	Glycerophosphoglycerol	Lipid	Glycerolipid and Phospholipid Metabolism	HMDB0240316	Meta_326	0.946	245.054	[M-H]-	Negative_NH4HCO3	73.76	9051	318234	168049	48292	19808	292061	90802	29858	569096	0	977945	635684	67716	597394	11284	129412	99991	19943	59754	50227	543142	47950	26088	0	66993	775072	875408	40509	3807165	33657	61451	28035	9354817	594174	44349	60008	8393318	11401938	1382047
83	Leu-Ile	Peptide	Dipeptide	HMDB0028932	Meta_328	4.853	245.186	[M+H]+	Positive	1979022	209518976	18390596	34144096	237491872	657490752	155007568	58362064	384388928	567216640	287557728	56599724	44303680	10726309	237208144	18168136	469964032	538280128	10864827	117067184	53588120	14532110	232945968	251190528	160417536	75906176	341124320	105913464	222357616	51002836	192069456	3708568	20149680	227604224	2915391	15981668	18748456	1118611	825868	7141490
84	Glyceric Acid	Carbohydrate	Pentose phosphate pathway	HMDB0000139	Meta_33	1.119	105.018	[M-H]-	Negative_FA	41.57	27770986	24791970	32494208	24886846	18770200	25649642	31200102	29257008	30937796	28063578	50360396	28652550	34751048	16562059	21747810	25322704	27827648	28685698	21505090	31426866	136908304	27226270	25059306	24417984	27069232	22082982	25778746	23041778	24477550	24079476	29004478	24617624	45026644	44680944	24376986	24080456	55228952	31162280	33527970
85	Leu-Gly-Gly	Peptide	Small peptide		Meta_330	1.451	246.141	[M+H]+	Positive	206795	17061564	2638341	4050993	14576558	46001252	24275236	6272306	53320568	36369976	11823541	4705154	10129629	385354	50728364	10348333	33337560	87918208	1275625	31429534	3847506	12919622	13967382	38187312	43920516	10418936	41585396	24776678	41086748	22964282	13133134	328959	821088	29406752	1036764	6720390	1164483	6286088	0	428300
86	Ile-Asp	Unclassified	Unclassified		Meta_332	1.539	247.129	[M+H]+	Positive	68.91	42317333	6418289	10633120	34154078	45847221	40396307	10508981	67244658	118319461	21361185	16182370	17140224	5856570	230847769	14275860	111306627	107511244	3997513	22173167	10861156	593103	65400438	79388145	23722330	45092732	119754526	28891671	10336087	53883540	23442335	1443228	1039723	75766920	6246105	1096775	2435245	4620263	355050	4978688
87	Asp-Leu	Unclassified	Unclassified		Meta_333	3.151	247.129	[M+H]+	Positive	34.85	46275296	2069359	8147364	15354752	41713808	16042886	3803072	32419008	46105416	10512352	4615054	3559903	2776546	53215532	6039313	58452320	21497146	2411912	12445572	4958962	6002185	27463566	36240688	12481875	34495428	35604992	35939052	2763706	12593018	28380636	2094590	2606152	42990700	3442461	1594874	1438832	2211548	781387	1541110
88	Val-Met	Peptide	Dipeptide	HMDB0259742	Meta_337	2.46	249.126	[M+H]+	Positive	9.46	3760816	98600	47717	518404	17219564	1221455	217618	69388	185643	1347334	88315	107826	0	7460691	206142	6692537	1623827	146974	1326010	0	2005870	1277763	3941930	591872	261917	700277	1704984	1650291	155708	2705373	0	141879	155692	258004	0	440081	0	25980	0
89	Met-Val	Peptide	Dipeptide	HMDB0028986	Meta_338	2.821	249.127	[M+H]+	Positive	10.72	3867407	38954	295221	518368	28975254	2483452	199102	67325	51890	4449015	152475	348425	0	19922921	968672	10998292	3427592	89864	2262418	0	499074	5017838	5737263	2087702	2494286	715129	3946261	5246274	117755	6656965	0	489210	30010	0	49899	440065	0	25975	63423
90	L-Serine	Amino Acid	Glycine, Serine and Threonine Metabolism	HMDB0000187	Meta_34	1.308	106.05	[M+H]+	Positive	20.34	16737594	23317910	34378612	10727947	16710024	22201752	44883356	24640276	114792976	39318316	26152792	29356450	16136940	24523270	15643625	43618708	31409996	14139324	15453726	15515140	16353718	21058338	23875114	23717524	21217590	84846936	15583985	9789034	37307112	18714782	20209918	18910320	72983104	25939778	17145914	12837004	79446136	68414320	27866806
91	Ser-Phe	Peptide	Dipeptide	HMDB0029046	Meta_343	1.779	253.116	[M+H]+	Positive	24.15	11092086	361401	1900875	5352904	66908964	7835638	1901266	12827728	33509678	7174870	3981243	1179284	8247190	37980072	1692414	20408588	10048152	476623	7028411	2056445	10209595	8919176	11869934	6095196	5631586	37743428	7116228	5797548	1286313	7791850	64269	1911322	14873752	263824	3601410	1588365	2483952	877592	49037
92	Liquiritigenin	Unclassified	Unclassified		Meta_346	5.876	255.066	[M-H]-	Negative_FA	107380	12298134	5303640	1705297	54591600	17023298	26187	12444958	8881327	25990	17932	520207	17687	6130661	228928	1945278	23733	295	260811	14292356	0	2436929	14735	1058235	4594187	0	2116592	175016	169157	17499	0	2887580	0	92737	530520	7524040	2096776	275500	1945962	0
93	Ile-Gln	Unclassified	Unclassified		Meta_357	1.494	260.16	[M+H]+	Positive	18548.6	14465000	1351866	4090271	7896248	70220377	9200850	6158147	18134893	43066624	9618162	3119921	3004265	321336	49363509	917909	42852624	20899092	954606	8736962	5840468	0	16516672	20417868	7259864	4338277	40552397	11087799	9772896	8577032	11961678	143977	1553631	24570032	452038	933904	1251909	289875	72691	0
94	Gln-Leu	Unclassified	Unclassified		Meta_358	2.884	260.16	[M+H]+	Positive	36.67	7394609	213482	2527618	11317619	21999548	2655608	4731700	6003301	46172112	2262508	4285091	1708415	464661	5568196	1276636	16016093	12497648	346996	2781059	2958872	0	5763944	8659528	1913807	1886961	43213630	3774759	8351159	1965455	4525871	0	1742972	23722000	34814	679729	520584	49473	0	48120
95	Lys-Ile	Peptide	Dipeptide	HMDB0028954	Meta_360	1.625	260.197	[M+H]+	Positive	178852	22127116	356537	2536444	15857319	54231032	2562152	2352961	20242378	82763616	5876768	3140345	1655062	440240	34675888	3024403	38874648	37165876	413315	4338664	2661268	0	12454472	20637198	3780494	16115799	98522392	10009376	9139635	3134132	9676842	0	2877756	43987624	199014	534014	768993	45715	0	104394
96	Diaveridine	Unclassified	Unclassified		Meta_361	3.182	261.13	[M+H]+	Positive	93.12	50973868	3739084	63367404	168418848	732303488	19749326	5164795	23553342	37191436	7128738	41660788	1709157	7580758	34986276	96564448	110675416	33147788	19368922	7975770	4493980	2253183	27740634	185495040	13198225	18135876	215056240	70990512	21605562	12316477	34175724	8494601	21666584	12443138	209696384	5587545	356852736	105014336	271829824	4797786
97	Leu-Glu	Peptide	Dipeptide	HMDB0028928	Meta_362	1.711	261.139	[M+H]+	Positive	19.29	33819497	1389536	8239987	14538980	79310996	6911639	6552885	32168699	136934851	7740521	4156107	6848522	2749628	267818809	5274493	135231466	37132402	2185901	10703191	5243901	67595	36108377	66588620	6943814	13548863	137288108	36587358	11946156	15528559	24418470	380471	1548348	54430336	2658756	1527130	1849679	47728	104938	9961552
98	Gamma-Glutamylleucine	Peptide	Gamma-glutamyl Amino Acid	HMDB0011171	Meta_363	2.767	261.144	[M+H]+	Positive	15.19	14970811	291439	3674694	4109524	95574024	1598288	699833	8365789	29877748	3101952	538119	264202	741551	126334920	766531	36032360	5379186	53399	10739832	3630622	4189127	6074652	15963135	1824722	3030122	26609912	13732575	4317356	6748462	12561280	167348	103585	51969544	632877	958259	626194	0	34451	1195025
99	Gly-Trp	Peptide	Dipeptide	HMDB0028852	Meta_364	4.079	262.119	[M+H]+	Positive	10.42	2234146	39746	0	1879478	6667850	828296	144458	2628963	4630948	529294	66482	0	0	4396994	50963	6471345	1795069	0	2161063	49943	244607	3002179	2870166	1132924	48875	4736875	2121816	1637179	39323	217323	32536	0	77213	57223	133742	0	0	0	0
100	Met-Leu	Peptide	Dipeptide	HMDB0028977	Meta_367	4.453	263.139	[M+H]+	Positive	40.24	11679483	2523817	2108837	145122204	26920354	63021216	23993372	109131751	19382808	14933490	80089734	78606383	2192746	93349992	121362	12380986	68734207	1401992	137841432	18333451	69727424	71985742	81925301	47240680	64103966	26278176	9130678	41954391	23652157	1811689	10967134	1559804	73869853	2746286	3314485	1199408	5505553	1743579	5701178
101	Met-Ile	Unclassified	Unclassified		Meta_368	3.701	263.139	[M+H]+	Positive	17.69	5160124	39279	207483	42179	40146113	1418942	619592	2420914	7376545	1619100	153763	49030	0	14227320	451929	16262515	4356417	138734	2291841	39043	323530	4047771	8835479	764133	1929434	7270572	5291986	3533684	222375	7504467	0	232419	5704826	0	291493	165665	38064	92666	0
102	Val-Phe	Peptide	Dipeptide	HMDB0029134	Meta_371	4.144	265.155	[M+H]+	Positive	62.03	25190848	977906	4475712	12959884	96923736	11660061	5038424	28959566	57206196	18738924	5105316	931922	1144074	41271968	3178868	48101608	23584456	826623	13244666	3223990	3464304	18781626	26752758	11179102	9294757	102181000	16022308	27862784	4392456	24229806	197507	1903462	56578428	517967	2561629	2053534	36989	184661	318107
103	Thr-Phe	Peptide	Dipeptide	HMDB0029068	Meta_373	3.645	267.134	[M+H]+	Positive	126.17	21175588	1629469	10566786	19642445	50129836	258735525	78539555	38412077	107171988	373138539	78231091	16149514	189737	41486485	2142712	64542552	79257872	956444	40807680	24000537	37986612	19094292	34713738	247199716	8825062	89390352	14545624	7262590	27194658	17772714	3399579	295998	42155505	742647	803010	1115604	216573	262325	1434057
104	Ser-Tyr	Peptide	Dipeptide	HMDB0029051	Meta_377	1.644	269.112	[M+H]+	Positive	27.82	7878572	255977	1142755	6533327	24877062	1658898	1627710	7337526	37035260	2907522	3105761	488548	2690820	11771931	734529	19246942	4122550	189781	1527749	700134	1894687	5279166	9678699	1960981	2077206	40283688	5692618	3242869	1468089	1243347	0	243011	31775176	157315	270138	726884	98386	1411079	0
105	His-Leu	Peptide	Dipeptide	HMDB0028889	Meta_378	1.551	269.161	[M+H]+	Positive	51.78	27483098	3235916	2735409	7472086	81957064	7282148	4116166	17294714	52306408	10066628	2496880	2750983	724407	37397988	1423978	43399516	21009766	659685	7280913	4185840	64491	8544583	17736950	7162078	5992906	58605872	10473363	8223352	7106033	15320946	159646	1620352	32807550	430763	642398	567698	105155	0	2557281
106	Heptadecanoic Acid (C17:0)	Lipid	Long Chain Fatty Acid	HMDB0002259	Meta_379	8.869	269.248	[M-H]-	Negative_NH4HCO3	42.8	3741770	3990526	2844338	5116312	10312850	4517441	4415793	3345586	4538071	2819014	2398302	4735153	2927387	5751574	3842959	6396350	4346003	2530175	3625472	2567708	4242277	5849832	3675545	4041813	4678604	2318032	2447467	9788985	7180590	5601693	4183940	4449224	3985861	3063704	2647467	4458949	2387082	2659848	3164724
107	Pro-Gly-Pro	Unclassified	Unclassified		Meta_380	1.578	270.145	[M+H]+	Positive	350768	9449348	8315161	1293353	58466728	2360555	104448128	39806020	106847104	9320710	19722014	61303184	90709264	946282	254633520	1157720	5910608	190769632	288905	91647848	14349304	21455996	77817952	35546656	74941136	240230480	11694400	23192710	45375244	69406736	4547318	1952924	102411	9623730	4773315	192947	5190218	2489412	1094301	10413049
108	Naringenin	Xenobiotics	Natural Product/Food/Plant	HMDB0002670	Meta_382	6.061	271.061	[M-H]-	Negative_FA	661554	1208809	638361	0	13154506	5097480	307410	502944	398343	242200	0	5703762	623830	4798789	70355	1582552	5250338	339567	568919	12852949	96489	7189247	31823	4147106	4734320	10804163	485607	22687	26151	3528849	36375	719592	0	0	8087684	84454111	320030	1426426	307423	0
109	Phe-Leu	Peptide	Dipeptide	HMDB0253025	Meta_386	5.352	279.17	[M+H]+	Positive	164.37	99430920	20417672	10769368	109587082	232052800	93624480	69123348	133375985	268691955	175748415	48722500	62223546	12740497	167496327	20051293	175309558	914939255	8940663	81365943	27168470	11848210	115034315	99535341	106707409	109817795	24366028	46582885	76319353	3371555	18200607	3795652	9717081	150435141	1608060	6366390	9136857	5928973	3578440	4707458
110	Phe-Ile	Peptide	Dipeptide	HMDB0028998	Meta_387	5.092	279.17	[M+H]+	Positive	96.13	24259546	854985	1963501	105790520	153689456	16902742	5094094	45495984	46589652	14514499	3491909	5007281	1319237	54283916	4803924	72400848	32524770	1638655	23494198	2838596	903315	17347844	43579940	20234770	26042650	120081472	16756710	25750062	7596260	26566070	133961	1412868	64151624	418767	1953967	1264773	5703961	3529618	86133
111	Linoleic Acid (C18:2n6)	Lipid	Long Chain Fatty Acid	HMDB0000673	Meta_388	8.407	279.232	[M-H]-	Negative_NH4HCO3	167.14	17383769	8006841	840438	1829932	29154491	9295175	850375	4399462	5744608	3956837	1740596	4129488	1460639	53105445	1158719	8844087	3462045	479225	36198056	3729857	129375416	32619647	4038392	9963177	8483748	1462350	857888	64215332	29397296	7127361	600485	43756550	744536	1001453	604927	1832305	1240178	422287	853307
112	Phe-Asn	Unclassified	Unclassified		Meta_389	1.716	280.129	[M+H]+	Positive	18.71	2324164	1734328	1182633	1495514	6563883	2394688	744179	5964614	8073890	2170788	409499	0	0	6141314	73074	7729039	182178	174220	2021372	780021	222008	2739819	3396018	1244414	523645	8852803	2730095	103805	245236	155293	0	153625	2732667	2460169	50640	135952	39881	0	0
113	Uracil	Nucleotide	Pyrimidine Metabolism, Uracil containing	HMDB0000300	Meta_39	1.447	113.035	[M+H]+	Positive	12.88	23425018	4221658	5423619	9702071	79949392	8246850	3085614	4933390	155270896	4641738	5000336	3519871	10039909	91173656	1718937	3692104	1268652	7775892	7279645	7883371	4666230	5135502	8336634	7400744	9754840	204857536	8020568	4527312	1909932	4306820	4274345	55553036	74797448	15813296	4654918	7594440	13562607	15443897	2672301
114	Myristoylglycine	Lipid	Fatty Acid Metabolism (Acyl glycines)	HMDB0013250	Meta_397	7.045	284.223	[M-H]-	Negative_FA	131702	173824	25414	721750	51676	262795	344818	19328	164707	99026	0	0	0	0	245577	36399	41130	63103	54057	43431	40530	0	156500	38424	55786	46504	1156372	39706	192916	31475	351787	0	571661	0	0	29865	71126	39325	0	21946
115	Xanthosine	Nucleotide	Purine Metabolism, (Hypo)Xanthine/Inosine containing	HMDB0000299	Meta_398	1.54	285.085	[M+H]+	Positive	14.46	2744621	391752	0	2318891	3804130	704973	0	3698989	962837	547267	490290	392449	51966	6008099	833801	10983320	7898136	33242	253187	67584	845046	7006426	4366855	456048	4987633	2446881	2076738	2123980	2294000	1823902	0	0	2038734	49497	538144	0	0	0	0
116	Hexadecanedioate (C16-DC)	Lipid	Fatty Acid, Dicarboxylate	HMDB0000672	Meta_399	6.616	285.207	[M-H]-	Negative_FA	174089	4849069	3091482	1121922	7731788	3457613	3014081	9895940	3799730	10579355	1342778	32105112	5344924	3161018	9850378	4116313	3668398	4369624	4484546	3077045	2769384	27184784	4368926	7003369	2398426	4081478	10449622	4531032	2803924	2363738	4593301	1894397	8333932	4140096	2772619	3314997	3931304	5874932	3322882	1191197
117	Propanoic Acid	Carbohydrate	Propanoate Metabolism	HMDB0000237	Meta_4	1.041	73.0283	[M-H]-	Negative_NH4HCO3	4116.34	3409682810	1600506255	179941538	5194861562	2199991241	3116576467	1253847370	3973880679	423661925	1821058929	3917080554	2689708165	28411942	4448823736	669951484	3075618359	1810965197	2008152103	2562413690	2113042379	1034681957	4750375198	2999499156	1235124494	5797537584	306984513	2358432118	6812030647	3489338884	4667134797	420337271	78036385	299054254	118249812	2317059451	1615324752	380450090	24368379	289293340
118	Arg-Leu	Peptide	Dipeptide	HMDB0028713	Meta_402	1.65	288.203	[M+H]+	Positive	125719	35554864	3188447	936693	27485230	160616400	13785224	6535516	13044857	77339408	35901160	12167742	10032887	2201447	27202628	2331760	47295712	39789392	129039	4427338	6498466	0	8267224	23579526	18824734	6766473	101601824	8298040	14367366	4697306	11050330	111814	2985966	98433368	93121	1726335	2503771	221161	39986	82386
119	Lauryl diethanolamide	Lipid	Endocannabinoid (N-acylethanolamine)	HMDB0032358	Meta_403	6.746	288.253	[M+H]+	Positive	116457	1627764	1784133	1339824	2880324	1705741	1172609	3143410	1362212	1243956	1062666	7833247	2093656	2306183	2013773	1380122	1560848	2576599	1609721	1669102	1090312	13704322	2786970	2050010	2261371	2589529	1988353	2310957	1882285	1342199	1380152	1403535	1637724	1955401	1683236	1738113	2048052	3850256	2984097	1537163
120	6-Gingerol	Xenobiotics	Natural Product/Food/Plant	HMDB0005783	Meta_407	7.424	293.176	[M-H]-	Negative_NH4HCO3	380.93	28724484	27329705	22611679	30865697	23665999	47318260	35739912	26418633	27661471	44998100	23494943	36735190	31574029	37462745	32075756	32801179	48325761	25488203	41807178	35732238	43732579	38700923	31787805	42573339	27997036	31006288	32581290	24267073	47547270	36193874	18843823	36705175	23023744	31730335	31394118	31698107	31596995	31798645	25025286
121	Gamma-Glutamylphenylalanine	Peptide	Gamma-glutamyl Amino Acid	HMDB0000594	Meta_410	3.878	295.128	[M+H]+	Positive	31.64	12279039	235520	2648070	6932216	18420540	3823131	2683038	5720974	27535952	3353086	14256826	3087464	268124	27585160	4293856	33317172	7035299	668290	2874834	825488	29893974	5332971	21015434	2976470	11339821	25779154	13314963	10984170	2450059	9144202	750113	94867	17695756	328908	273789	122259	8405731	2879226	145541
122	Phe-Glu	Peptide	Dipeptide	HMDB0028994	Meta_411	2.342	295.129	[M+H]+	Positive	62.16	38351354	352811	4120259	7950841	23162636	4235405	4548491	32693476	44310939	7244605	2069154	156581	1269395	133868147	4114590	65223658	13113851	1429520	6667960	3628082	115271	21395705	36184760	3588154	6317046	46503270	18372175	5433097	7297841	18479685	469673	159554	7933775	1274458	66778	786444	0	29039	1998385
123	Tyr-Ile	Unclassified	Unclassified		Meta_412	4.239	295.165	[M+H]+	Positive	68.45	20350526	1414989	4255208	18038776	93045968	123581512	25934954	25772700	73592240	159300496	36155768	27395340	542360	40194900	3992859	58291076	101539784	880481	16384761	7178714	5313323	21176128	35227696	54707520	18205974	70875032	18159082	24959018	18584696	23186184	1250063	3389218	40228024	1264210	1550372	1524578	194915	162224	200395
124	Ile-Tyr	Peptide	Dipeptide	HMDB0028919	Meta_413	3.557	295.165	[M+H]+	Positive	47.8	21877108	1249917	2433700	38574632	105961856	36143164	21725168	33537480	87851128	51408752	47565912	18594112	1267799	28211606	6019318	52935776	50415232	1031127	14200014	6019436	3304608	32077496	31223726	24435468	19327912	67350520	11531809	22521298	6998802	19728886	1669630	2100310	53849880	113572	2257058	1823403	280029	156451	176959
125	7-Methylguanosine	Nucleotide	Purine Metabolism, Guanine containing	HMDB0001107	Meta_418	1.559	298.114	[M+K]+	Positive	38261.3	1373592	692962	0	844406	6671528	128695	0	1864845	6808045	1009832	186688	119394	0	431932	0	6005050	1716552	0	673873	478916	0	2236352	1738890	736083	248710	6712639	839755	1291171	126154	1851590	0	0	873707	64979	87889	109157	303609	392246	0
126	Perfluorobutane Sulfonic Acid	Xenobiotics	Chemical	HMDB0246220	Meta_419	7.114	298.943	[M-H]-	Negative_NH4HCO3	1278.99	32789479	31673669	43731306	37211102	22874742	27295738	40195531	26426548	33097082	37859998	31474174	33214719	32443266	39902178	35146026	30421493	31655307	28708277	36061743	33720077	22591465	23899311	48814423	26570285	38149073	39081377	18349833	26067707	38569115	21463080	30891858	30061529	35242132	30829959	40580666	39140244	27456446	47638793	30045219
127	Palmitoyl ethanolamide	Lipid	Endocannabinoid (N-acylethanolamine)	HMDB0002100	Meta_422	7.44	300.289	[M+H]+	Positive	120714	2213672	128720	87833	3248866	20465846	2115180	0	2550564	487819	196431	53486	559852	78142	5574096	177912	7652468	1666268	64140	1687996	154392	3805732	1307378	877543	1132569	2715846	167203	44299	3594078	1012759	1125808	46655	368653	69876	50464	76166	77568	112419	132710	0
128	Tetradecyl diethanolamine	Lipid	Endocannabinoid (N-acylethanolamine)		Meta_426	7.076	302.305	[M+H]+	Positive	560606	11097559	2552078	652666	12459707	29686799	5357157	534589	5360722	1051930	1040729	989431	6394962	1056726	11598902	711294	6768271	3018556	713511	4455830	922342	42734223	7696687	1944082	5385506	5507930	1083802	1516639	15789061	21738135	2766326	714040	913950	1924537	574614	618654	714837	1426913	2066722	588282
129	12-HETE	Lipid	Eicosanoid	HMDB0006111	Meta_428	6.913	303.232	[M+H-H2O]+	Positive	95688.7	21581757	27201298	3756256	3529792	105732410	53916915	944084	17058522	38276681	41623044	1163811	2894785	1373053	30262809	2480486	11437129	11150390	454882	91667691	18337567	2420912	25177327	6299891	30818500	20497426	19364274	3542332	9392506	11742431	22898259	3693558	17241089	48555	1027145	2549061	4513537	246726	83177	470959
130	Arachidonic Acid (C20:4n6)	Lipid	Long Chain Fatty Acid	HMDB0001043	Meta_429	8.409	303.233	[M-H]-	Negative_NH4HCO3	57.6	2315606	223057	0	49477	8189308	1702070	24570	1728523	25749	507202	25396	241954	159663	34050544	20022	1975646	275345	31366	2593656	433628	1083494	6741626	54180	1463160	3731310	28431	33891	8191338	9678440	3564470	0	7725920	31710	27267	20602	28815	27710	33172	25743
131	N-Acetylneuraminic Acid	Carbohydrate	Amino sugar and Nucleotide sugar Metabolism	HMDB0000230	Meta_430	1.204	308.099	[M-H]-	Negative_FA	202322	11031006	5097450	3809844	143557840	8029863	79330464	45713088	94914520	3116854	100585032	36543100	66578700	15678982	20622376	904259	4083680	9503181	6254568	10670498	17332292	46682232	10195200	78318856	56095820	3110937	6577422	2993769	7995804	61376092	2063634	2665374	0	138760832	124866	2136454	3691208	37902848	15773098	2355254
132	Octadecadienedioate (C18:2-DC)	Lipid	Fatty Acid, Dicarboxylate	HMDB0000782	Meta_432	6.571	309.207	[M-H]-	Negative_FA	133158	11415282	4865810	177730	12228462	17343410	3904068	2719214	3855535	38910076	1545153	9412194	6778092	4419862	11258754	4486430	8776278	8725851	8678490	4160554	1392862	11782288	9033919	7336066	1707212	47789512	34105948	3397468	5872658	1861435	9699972	1368419	15098940	13786917	3399370	6926064	4932994	10330912	6708506	732817
133	Triptophenolide	Unclassified	Unclassified		Meta_435	6.919	311.168	[M-H]-	Negative_FA	220.97	44735802	46553941	33377477	59063288	100966851	50594035	45044163	38746481	30949403	51252072	30356894	34149266	21997219	66515289	42406191	87751444	67856067	55057950	39406821	34190723	41870577	37829264	32474340	42215764	118175996	35245697	33239899	41221218	39858333	53098215	19970372	34994848	27672346	30170015	29013376	47136102	36497942	28852070	33802822
134	Octadecenedioate (C18:1-DC)	Lipid	Fatty Acid, Dicarboxylate	HMDB0304442	Meta_437	6.654	311.223	[M-H]-	Negative_FA	104791	56276593	26294805	2032652	22850396	22939324	9978725	8324070	18373679	266188030	10012073	33923616	30375534	14376610	29857037	10223458	20499890	25410405	17169150	11330938	8041199	35349431	29662528	17943131	6232744	99344540	239037344	15013958	12069331	9380186	39023447	7263655	86292903	35379629	5987763	16324599	11338642	52328671	16551304	3920343
135	3-Methyl-2-Oxobutyrate	Amino Acid	Leucine, Isoleucine and Valine Metabolism	HMDB0000019	Meta_44	2.263	115.039	[M-H]-	Negative_FA	121.32	46386780	19761884	45024812	124744896	119865992	35182416	24585054	58826624	48042940	31262348	136731376	52987876	22094352	113481920	27291130	47414268	79516256	23726724	28627604	20270158	417741824	38221896	56070632	43829328	33995200	118145016	31079712	67027124	29668784	38630892	18665776	95177016	62873876	31650878	69532720	27103000	66020992	34437320	15261641
136	12-HEPE	Lipid	Eicosanoid	HMDB0010202	Meta_442	7.818	317.212	[M-H]-	Negative_NH4HCO3	21343.7	240744	232531	0	0	1926542	103485	1451798	330877	1568402	508627	1051215	33282	0	174533	216815	263405	179251	0	771805	77533	89188	923164	87822	93903	211686	509894	40732	10334432	424909	176406	0	112638	27751	0	27060	40122	0	0	0
137	Leu-Trp	Peptide	Dipeptide	HMDB0028940	Meta_443	5.42	318.181	[M+H]+	Positive	27.17	20623670	869589	4637340	14232281	47127260	12521028	6300984	18520548	35075432	14188698	4875010	4255988	145977	12308122	3132950	36153280	27970804	245350	11554246	5784652	1090587	14913188	19029970	16747952	10712017	41736580	10781575	9648408	6642122	17544878	488135	1782554	4123714	101689	1483528	418727	0	0	151264
138	8-HETE	Unclassified	Unclassified		Meta_444	6.918	319.228	[M-H]1-	Negative_FA	2196302	28564262	42200252	4807072	6753856	207566400	93705448	1290630	27146596	47715704	55102228	1759881	3616548	1794379	67230280	4313996	15119825	13454707	1296678	151097696	29212472	2205408	39964980	10571704	52551452	37272972	43138728	5938913	10975298	15435511	20483762	5197514	22179460	141839	1871300	1860819	8984285	183372	321157	616350
139	11-HETE	Unclassified	Unclassified		Meta_445	7.896	319.228	[M-H]-	Negative_NH4HCO3	156440	4163378	16510773	1035639	477098	24128885	21191658	107583	2930563	12232784	17301982	24331	329993	147407	7178646	474790	1953259	2174884	0	37827611	2927670	316782	5824646	734275	6024999	6770189	4068926	539110	1740895	2712855	4687078	688852	2985977	0	92124	190155	862850	21976	0	0
140	Linoleoyl ethanolamide	Lipid	Endocannabinoid (N-acylethanolamine)	HMDB0012252	Meta_446	7.122	324.289	[M+H]+	Positive	190990	3801742	624153	0	3881478	17801778	1231965	40812	1207720	291740	48093	180827	2082263	103803	8127407	35759	2799917	1235708	73448	1370936	106279	9591249	2917815	350737	1064204	4018903	414630	220556	4445872	4764780	1041912	66642	471198	464819	77934	92558	0	421592	596115	0
141	Dodecylbenzenesulfonic acid	Xenobiotics	Chemical	HMDB0031031	Meta_447	7.051	325.183	[M-H]-	Negative_FA	154.46	40016673	35645290	31822802	40893724	93895703	38519535	35705750	29650309	22015519	42877393	19886392	25681025	20192230	56806371	34811263	73321695	54805977	31516204	31693811	24380971	34571455	28597806	26223264	35079166	66280478	26158150	24706971	35202651	39221815	47601985	18751534	26331183	26169017	24608537	18929406	29647462	27487394	25518013	33974468
142	Caproic Acid (C6:0)/4-methylvaleric acid	Lipid	Medium Chain Fatty Acid	HMDB0000535	Meta_45	3.961	115.075	[M-H]-	Negative_NH4HCO3	900.22	975242311	12431003	9154666	102288393	662004580	543322485	9037568	293650603	1212730	224699610	10888466	59216092	5401173	1000458811	266714504	364645093	1152292399	15616699	315824588	55302317	2022164	277583166	268101507	141488387	163716316	1601907	69433324	3689737403	163760782	2539213286	19289642	88013777	2455770	1936767	790997710	34404649	151300	1297076	11541203
143	Trp-Glu	Peptide	Dipeptide	HMDB0029082	Meta_452	3.228	334.139	[M+H]+	Positive	145465	5109316	203057	786221	6298752	7847663	3510753	884335	9892723	3611496	609647	1916427	1642022	42576	19429298	2934478	20481650	9045477	1337342	2981665	1334078	7434866	7006858	12841102	1633949	2523786	4022760	2280332	2830950	3778010	4992680	91646	0	351437	4302094	55421	325910	0	0	1141484
144	Sucrose	Carbohydrate	Polysaccharides and Oligosaccharides	HMDB0000258	Meta_455	1.021	341.109	[M-H]-	Negative_NH4HCO3	373.11	0	28417	64803	0	0	30546	322993	13974	21598	0	9253458	0	0	0	0	0	40464	54638	22943	17108	156851621	0	14399	18365	21482	107548	70024	0	53736	0	22984	0	280874069	187871	0	2274696	132555	169226118	27729
145	Prolinamide	Xenobiotics	Natural Product/Food/Plant	HMDB0253910	Meta_46	1.07	115.087	[M+H]+	Positive	13.58	3468475	2844745	2480478	4488771	29398711	11230537	24216914	20521394	5733049	14082978	13637714	24602524	1503428	55140783	2761210	3341253	33420336	9784009	20383023	21674060	5446265	11458088	8725398	22386130	3756002	7859763	18243945	2738418	3764769	2859585	11245444	5182926	20087914	37760021	2448665	12041090	4352382	12908391	21717494
146	Deoxycholic Acid	Lipid	Bile Acid	HMDB0000626	Meta_468	6.913	391.289	[M-H]-	Negative_FA	2168491	2645091	1013250	744128	2355969	2025374	3102711	1159524	2514002	6838359	3061271	2059961	1050208	10011625	9230272	1360209	1762416	3697638	1280191	2317714	3216078	1488544	2408463	2318896	2722452	1298264	6174328	1568395	1395341	1896029	1391578	1992419	1328743	1531370	3196245	5321814	2445559	2215690	1187152	1526150
147	Cholic Acid	Lipid	Bile Acid	HMDB0000619	Meta_470	6.653	407.28	[M-H]-	Negative_FA	133876	804736	225479	0	955935	141448	245350	140796	345608	7406234	180345	573476	27623	394800	1254991	307057	0	1634716	28343	265735	152452	0	436331	318456	997314	145469	6597708	123236	115144	73190	606101	120548	409508	349772	332605	12991388	0	208796	229756	116417
148	DEHP	Xenobiotics	Chemical	HMDB0249243	Meta_471	7.95	413.266	[M+H]+	Positive	379178	23237536	14515378	14318445	23978978	23257828	23289212	21295436	21190335	22934988	22718491	23929425	18072006	22551956	23397080	16166169	22242376	21750402	21622933	20983813	22376443	23769414	20269817	23075904	23633315	14943768	20706624	24267159	10917234	12534259	14566818	21913518	13881674	24523109	24261151	23472532	24683898	25086160	25159404	15677971
149	LPG 18:1	Lipid	Glycerophospholipid (lysophosphatidylglycerol)	HMDB0240602	Meta_480	8.358	509.298	[M-H]-	Negative_NH4HCO3	270536	3113723	3387378	3270255	3155315	1172494	2143412	3387755	2099671	3391366	2399592	3320028	3345775	3095425	2899250	2067957	3621670	3407321	3291505	3215939	3314034	3176515	3275903	1561036	3333739	1646295	3128921	3405939	3493097	3515601	2270568	3653470	3310426	3280046	1916398	3264197	1594614	3087671	1613121	2056838
150	LPC 18:0_sn1	Lipid	Glycerophospholipid (lysophosphatidylcholine)	HMDB0010384	Meta_484	7.588	524.371	[M+H]+	Positive	144094	5416391	1493735	1642340	4167938	36314032	3825663	1509840	3078464	2385918	1915956	2193853	2323193	2187859	9083583	1247265	2683268	2277651	2813690	3285970	2649834	4769048	2764822	2902410	3029114	2117174	5038864	2867008	4946786	5107436	1739948	2226696	1968947	3791486	2466381	1779513	3039167	4311373	4656488	1798101
151	SM 34:1;O2|SM 18:1;O2/16:0	Lipid	Sphingolipid Metabolism	HMDB0010169	Meta_487	9.836	703.574	[M+H]+	Positive	277647	26355384	4689580	0	15151425	65614494	13707724	52706	11568526	8343254	2302826	197987	3021339	594108	34654675	423754	21694129	7426062	0	12173107	2981526	4869497	14285825	6088593	13778561	20446184	2521552	953124	11393946	17087807	14045237	0	3437232	0	1056122	151498	1040844	0	0	0
152	PC 34:1|PC 16:0_18:1	Lipid	Glycerophospholipid (phosphatidylcholine)	HMDB0007972	Meta_492	10.451	760.582	[M+H]+	Positive	49642.2	15183420	2721058	41542	8731779	27256677	5821359	78390	4998034	2369558	577069	522505	1629153	162988	24432317	822458	15118388	2866833	50798	4156440	1235782	27816821	6306412	2596293	5136627	3629599	1317216	435152	4119400	13260957	3530042	44048	776097	51998	122513	214707	461188	380409	157374	48064
153	Guanidinoacetic acid	Amino Acid	Creatine Metabolism	HMDB0000128	Meta_56	2.282	118.065	[M+H]+	Positive	12.07	33790344	10055261	2142095	24976664	69178352	27368024	11845823	30021488	19626164	12262763	27174270	26001044	2374605	113123296	10476891	33300548	47678892	4280766	22136858	6307153	14600021	29307688	34618184	18323336	37412520	28316304	13620535	15400658	13899029	38701564	2712164	8735152	18098104	2688462	6892600	4037494	9063521	2577239	1098002
154	2-Hydroxybenzonitrile	Xenobiotics	Chemical		Meta_60	2.145	120.045	[M+H]+	Positive	14.21	7474790	187626	54687	16497262	21807916	5815897	3812411	10050997	3760587	1424210	50463392	1544480	1358015	11446561	4971898	2607394	0	88478	156690	2526102	17199300	5262472	8176790	6390771	1837322	2798679	435044	24577766	586386	11550478	848294	529127	569968	274668	50691	2244311	25262570	181704	411963
155	L-Threonine	Amino Acid	Glycine, Serine and Threonine Metabolism	HMDB0000167	Meta_62	1.053	120.066	[M+H]+	Positive	12.9	3296113	11232792	17069264	5600427	14261904	1253002	7636367	1177225	87066909	6337184	1659863	13829890	6174499	17697943	9356426	4435932	2990787	2795505	2891371	5047229	891185	10786524	1171436	2447714	14709777	70133894	8698338	10648595	9420009	11390541	4237487	8004379	61333323	13835919	4944873	2582452	11986484	15108780	9587265
156	Phenylethanolamine	Xenobiotics	Chemical	HMDB0001065	Meta_63	2.295	120.081	[M-H2O+H]+	Positive	1031.87	3585480871	1327512325	289188880	2176350929	6361051038	2905355518	1466323982	3251503926	2059030835	1520734873	2921790815	2974030126	210985821	10646958774	1194725745	4329291111	4900987556	345024764	2561450327	577090740	30462106	3040237229	3758788604	2113819968	4040985607	2240724405	1415970332	318263301	1562583339	4579560740	328870122	1032233045	1634417233	209503771	486849648	327401867	694340724	54803673	88174595
157	Phenylacetaldehyde	Amino Acid	Phenylalanine Metabolism	HMDB0006236	Meta_67	1.426	121.065	[M+H]+	Positive	127.46	38015036	38003552	24705492	40390768	24731604	134953408	77732968	40996112	38895236	71038384	529792672	74585544	29909622	91321760	46242708	37520912	98356016	48781984	39561780	85212544	49233068	33112410	70890592	125758920	51311192	30873580	56570020	20039528	38471932	31724704	81724064	17936824	38532536	33209494	41027644	47117880	68881792	114387624	26045100
158	Benzoic acid	Xenobiotics	Benzoate Metabolism	HMDB0001870	Meta_68	1.48	123.044	[M+H]+	Positive	155.03	235772506	290867987	45726836	146973460	46579309	302385888	194825885	276680459	127473208	127023572	260522560	418113413	57488558	937862549	89228027	290899938	331915673	145607628	183742280	170089087	43865119	243327889	287090011	172169174	332365380	130896596	164762398	10090861	169737907	227564015	56494866	5652155	104009144	34376473	30304527	11429777	136322770	21510856	83906967
159	Dimethyl Sulfoxide	Xenobiotics	Chemical	HMDB0002151	Meta_7	0.97	79.0185	[M+H]+	Positive	295.76	43317676	24513524	894025856	59724108	36859244	44865184	77913720	39231352	149450752	26160332	208513280	42310696	354935776	9776404	20742136	25195044	22923826	224371984	9117275	47264480	193446656	22097554	38967860	43440020	15414268	280762560	86499424	21595840	22302350	17007262	158826784	25609216	747648768	104223800	127170656	87545216	552275968	881899904	36501832
160	1-Methylcytosine	Nucleotide	Pyrimidine Metabolism, Cytidine containing	HMDB0243939	Meta_73	1.424	126.055	[M+H]+	Positive	12.86	17892924	17054676	10073620	36308684	40519408	23446202	21702836	14002178	16397709	11191195	42748280	12204074	23367880	30568456	7104676	15004420	14907180	13594838	7228860	18352884	79474256	9590105	25719202	16892216	8725039	25023378	16901830	11750781	8368270	12224241	14742194	12409372	17682846	14988929	16160177	15643466	16294965	20727976	14360020
161	Dl-Coniine	Xenobiotics	Natural Product/Food/Plant	HMDB0030285	Meta_77	2.354	128.143	[M+H]+	Positive	4.46	57440	58499	638751	443567	156237	266430	54803	397952	66194	60778	46823	75941	915327	273790	33904	217109	88012	395094	176781	427816	109625	53267	75060	54324	0	269463	215013	67303	50979	43009	723112	57678	1075781	335464	63890	720800	903856	748881	119405
162	2-Pyrrolidinone	Xenobiotics	Chemical	HMDB0002039	Meta_8	1.595	86.0606	[M+H]+	Positive	54.21	106611174	85737726	94751299	116888836	80647877	118956531	164121344	102420336	78077240	109672437	305453330	22639726	95902179	176979566	7794340	10720747	12862433	143908858	97962507	117452385	697808082	133168540	114382432	90903207	43575131	141778392	97081739	134359083	17501425	35784016	109003449	13462351	113582801	99818685	79257402	100312464	183599186	170454664	106959209
163	Pyroglutamine	Amino Acid	Alanine, Aspartate and Glutamate Metabolism	HMDB0062558	Meta_80	1.208	129.066	[M-H]-	Positive	25.21	11213723	83303847	7798735	10325876	26668474	7433314	1187673	17134461	83416033	9208673	55533792	8007520	22218835	6745158	19093596	16429114	25832984	29146515	24532924	12917733	141504235	1149359	15224318	19674986	20189714	64082128	24441619	3997260	23092534	3830330	5999945	8579976	27153700	13712023	15023043	25727023	15972109	17400998	1820186
164	Pyroglutamic Acid	Amino Acid	Glutathione Metabolism	HMDB0000267	Meta_82	1.444	130.05	[M+H]+	Positive	87.73	51299412	105108072	34768928	57595272	35280496	59739392	116511408	91030336	116073536	28251244	89007344	89081536	16209682	219838672	25829488	88275688	139194864	37827980	42195468	55377436	219940416	85363552	96134296	42653988	254578896	125390224	70781704	23560740	114320560	23309324	36634176	15697394	206411344	112462800	11311423	34819304	340128352	378290784	63948936
165	Ornithine	Amino Acid	Urea cycle; Arginine and Proline Metabolism	HMDB0000214	Meta_91	1.137	131.082	[M-H]-	Negative_FA	39.71	9179131	20945046	3232610	6662223	7509702	45562988	24201638	50486608	19302420	15877521	11183120	20099514	2259839	106155280	726918	22095160	43836592	1713903	35181856	24919348	3168239	24140178	16404622	23845386	10073833	24867862	17819808	1149158	54406696	6741682	7193888	21668	4409578	1741052	577643	283804	6132526	3945305	26155382
166	L-Leucine	Amino Acid	Leucine, Isoleucine and Valine Metabolism	HMDB0000687	Meta_96	1.736	132.102	[M+H]+	Positive	2529.41	5063064064	82158664	380711008	2969438720	13533162496	1229375488	1094519296	4138986240	4513885696	1159447552	424246432	582963200	143536304	23526602752	1513776896	7913391104	6129695744	103212656	3162588160	146078544	131733992	2849995264	5658150912	2316504576	3678858240	5179220992	976220672	818519168	2085432192	6756872192	37428140	3676040960	2886974720	223679152	2297915904	103640952	57344272	59595612	72507984
167	Trans-Cinnamaldehyde	Xenobiotics	Natural Product/Food/Plant	HMDB0003441	Meta_98	6.582	133.065	[M+H]+	Positive	12.7	22561100	17516654	8995942	25750378	25084936	15913324	16685400	18075432	21673534	12631746	24785728	24531132	19812770	26871144	20238916	17222038	19081626	13573660	18237994	14351119	25577626	20813962	17326354	18314432	17137282	23035378	23483102	42978872	18166970	19351616	13664482	15941083	22611548	21887696	19551922	20348724	27321172	14386282	14777158
#N/A	1-Methylguanine	Nucleotide	Purine Metabolism, Guanine containing	HMDB0003282	Meta_170	1.321	166.072	[M+H]+	Positive	75.92	26536460	15087165	1025541	43604004	59333252	17972722	5727314	30583374	34925320	6146624	9432347	8496259	9322882	28583346	13005390	27627946	18406698	8385298	21099452	11359533	1940080	17693262	15976781	11403991	29403498	36779932	14660452	35233820	13357120	37103264	3760759	23335294	8167726	14290487	24340160	12222638	6677584	9623248	2903882
#N/A	1-Methylhistidine	Amino Acid	Histidine Metabolism	HMDB0000001	Meta_181	1.068	170.092	[M+H]+	Positive	19.49	6961155	2483627	806107	5474512	6257602	4515447	140634	1861918	9630471	1513899	1493699	6022671	1888133	10206072	151640	97693	6181747	521457	2071646	2660346	189186	3017657	2098183	1520124	11293854	5153411	7154607	334131	4049115	2567199	478707	1486516	959441	4029680	6395390	743822	3685105	7993100	939358
#N/A	10-HYDROXYDECANOATE	Lipid	Fatty Acid, Monohydroxy	HMDB0244272	Meta_269	5.595	211.13	[M+H]+	Positive	30.46	4322288	68292	72502	2269722	19342914	3710094	1019642	2872659	2032286	661586	2678656	6608686	1486353	7881480	1340796	2459386	783665	1557252	1599076	4278580	11242618	1885136	1882289	1635854	4506584	2848422	598832	2262558	2044573	12985058	35106	781920	897284	56978	501665	814058	1819540	220617	0
#N/A	10-Hydroxydecanoic acid	Lipid	Fatty Acid, Monohydroxy	HMDB0094656	Meta_226	6.274	187.133	[M-H]-	Negative_FA	19801.2	2156733	4229318	244186	1817838	8312009	2573020	711293	2182473	70112657	699835	3128470	1940612	1934893	3731398	621572	2923945	2271274	974335	1495600	1177897	554581	3587535	2542111	1136415	2995912	51998131	1665988	1149314	2008714	4476481	413306	2825487	1209841	1160748	1125313	1372488	1044346	2976804	9722925
#N/A	13-HODE + 9-HODE	Lipid	Fatty Acid, Monohydroxy	HMDB0004667	Meta_415	7.81	295.228	[M-H]-	Negative_NH4HCO3	207.68	6057234	17210381	667450	808492	29441038	3950629	340650	3055453	101552007	5398309	2944668	1842912	237895	10343081	918913	9772959	4295474	2111176	5219732	1192958	16520446	49134839	1566692	1954810	26245503	77208062	880197	2096256	2518484	10122389	481796	10944005	101649	400297	885686	1906309	603754	219405	159841
#N/A	13-HOTrE	Unclassified	Unclassified		Meta_409	6.875	293.213	[M-H]1-	Negative_FA	102034	48985636	59301940	2838124	24404014	371424032	46390956	6839662	54246712	208539600	28915944	32782728	60413488	5509724	20058352	17334976	49510244	52029996	54812000	123273416	23038008	61755144	153656800	41556984	37794112	555100992	176846048	30986070	20999604	15066927	57344988	8604331	34698880	4669286	6179268	7557470	21715374	14181654	6050732	3466958
#N/A	15-HEPE	Lipid	Eicosanoid	HMDB0010209	Meta_441	6.877	317.209	[M-H]-	Positive	407036	51773824	65536396	3559094	24854454	489326688	44700740	8712627	56766068	206503696	33716584	30512350	63352876	5692795	21765514	22745790	58807856	60419680	52273420	133997448	25855104	46195060	134362448	41340820	38451864	642040576	162739552	31032464	26027182	18722498	66478636	9274078	40094856	3429752	11324642	8638912	24843314	13237275	6184792	4653680
#N/A	2'-Deoxyuridine	Nucleotide	Pyrimidine Metabolism, Uracil containing	HMDB0000012	Meta_295	1.459	227.067	[M-H]-	Negative_NH4HCO3	48.9	5816644	33357	0	0	12178030	44115	0	0	0	0	180389	0	0	4358778	0	807614	25505	0	419222	0	1574896	333959	61451	24396	925870	0	20376	44931	0	1325528	0	0	0	0	0	0	0	0	19445
#N/A	2,3-Dihydroxybenzoic acid	Xenobiotics	Benzoate Metabolism	HMDB0000397	Meta_140	4.562	153.03	[M-H]-	Negative_FA	105.56	2797094	1565102	83160	31756770	16521613	9560063	11362942	1951197	399046	1019493	75670584	18741774	9916827	104612352	10218440	3079557	5394064	26206348	4771510	11204929	104157112	35144552	14369602	8559299	16292514	4653586	4407553	5092186	8185658	1064587	2335691	7100467	393945	3178384	4385126	7996398	1402243	65741	5563324
#N/A	2,4-DIHYDROXYBUTANOIC ACID	Xenobiotics	Natural Product/Food/Plant	HMDB0000360	Meta_59	1.238	119.031	[M-H]-	Negative_FA	92.99	10443606	3600987	171125	18415132	13652059	7334326	38484821	12766275	6491139	3050599	724761713	7538842	4509001	6071218	4846813	6506456	9568412	3579832	5536548	7016215	986160561	5790984	10523643	6434752	6565911	8246985	5244760	6411383	6351963	4379620	2776681	6382086	11493111	9944064	7792556	4955469	20984952	11539506	2169850
#N/A	2-Aminocaprylic acid	Xenobiotics	Natural Product/Food/Plant	HMDB0000991	Meta_153	4.921	160.133	[M+H]+	Positive	2663.82	1281714	703179	0	1036053	4866007	423234	46379	362595	2720610	94050	780704	668071	339349	3089156	43056	41680	607960	245327	323491	146772	0	35242	701494	476254	11538213	2962035	423269	787035	115391	2319757	49223	61531	654159	0	156052	213852	1577399	39120	53914
#N/A	2-Chloro-4-phenylphenol	Unclassified	Unclassified		Meta_254	4	203.032	[M-H]-	Negative_FA	28.09	32035	39991	70485	18542048	21558	20494	17485	0	19601	16927	70535	18786	533241	26573	20901	37497	27438	1436486	73809	38212	0	18505	85989	25650	32626	23938	17014	18631	23864	16195	19790	14618	24410	20846	1206385	17882	49073	24050	29790
#N/A	2-Ethylhexylparaben	Xenobiotics	Natural Product/Food/Plant		Meta_340	6.98	249.149	[M-H]-	Negative_NH4HCO3	37.84	0	23196	0	1779722	0	0	0	0	26866	0	0	0	22472	0	0	0	0	0	0	0	0	0	0	24559	28219	27836	0	0	0	0	0	0	0	0	0	0	0	25246	0
#N/A	2-Hydroxy-2-methylbutyric acid	Lipid	Fatty Acid, Monohydroxy	HMDB0001987	Meta_50	1.286	117.054	[M-H]-	Negative_NH4HCO3	158.04	40349340	30647616	3581537	50204362	88094518	11183066	7030593	33140435	46510862	7387806	83432722	49457167	6590444	37159655	63423271	63104180	97715568	17830723	16293503	7556751	88436693	25335596	47602224	39638900	43401986	24099806	12263112	73771102	47294419	114216407	3143974	57720322	26947729	8636844	213599120	8897417	19956652	16839400	5573085
#N/A	2-Hydroxybutyric Acid	Carbohydrate	Propanoate Metabolism	HMDB0000008	Meta_28	1.683	103.039	[M-H]-	Negative_FA	49.42	48894794	32177623	5847771	37809158	42313171	53299265	6053103	26209717	20661104	10662575	140361114	17596961	9549353	241300744	13606868	10069652	98126379	11156083	41319235	14260583	478445996	39051101	22447620	24847161	26994797	25944479	17568155	58798286	33956854	39456671	9136764	4279263	70554586	10236127	13036661	16511232	71728787	77656277	7226544
#N/A	2-Hydroxycaproic Acid	Lipid	Fatty Acid, Monohydroxy	HMDB0001624	Meta_90	2.15	131.07	[M-H]-	Negative_NH4HCO3	405.41	105420053	22353916	8567385	85226184	465971242	9531342	13201022	82390708	64253226	9027201	61492126	79855677	12362925	131248268	117842951	326626855	276730464	15209811	8019070	3077585	14295720	24901080	146935393	7386664	168855867	35260418	13880164	75540993	61144776	155052284	2209070	135520239	35904909	24125873	211078974	9866932	12733582	13114384	6831505
#N/A	2-Hydroxyglutaric Acid	Carbohydrate	Citrate cycle (TCA cycle)	HMDB0059655	Meta_125	0.882	147.029	[M-H]-	Negative_NH4HCO3	1157.94	14637320	519471031	42570621	49042408	18340192	97569701	116394141	233461292	161723988	30904513	380483387	239119240	35929721	67664698	34966860	85250984	127067553	121737433	30394970	72168895	208663691	55138032	84787443	42579937	156252896	161473528	32348082	7888814	121255711	15256182	38698954	10957521	209035000	126173150	13103095	15901387	232911446	188024628	180800350
#N/A	2-Hydroxyisovaleric acid	Amino Acid	Leucine, Isoleucine and Valine Metabolism	HMDB0000407	Meta_52	3.402	117.055	[M-H]-	Negative_FA	792.94	262733968	127815224	26028736	474818176	715399744	123523440	37611400	225228560	222071952	45485812	314834144	206657824	53829560	538752064	183899552	240278048	344571072	153143472	128994416	69877440	100648464	145109488	370874528	294539264	146460256	363612672	108852984	343017120	153460272	269163840	24732940	233567904	316288768	76154072	663381120	94232880	242793664	269247232	32134216
#N/A	2-Hydroxymyristate	Lipid	Fatty Acid, Monohydroxy	HMDB0002261	Meta_323	7.675	243.196	[M-H]-	Negative_NH4HCO3	208.55	58829	56598	0	22849	184867	30931	329364	26161	564451	24404	2486855	88232	23274	29540	0	28904	27156	0	24586	26401	49251664	21777	33063	28458	43531	169257	27411	28557	33545	165826	26010	25803	0	25378	33632	0	25425	26644	0
#N/A	2-Hydroxyoleate	Lipid	Fatty Acid, Monohydroxy		Meta_417	7.985	297.243	[M-H]-	Negative_NH4HCO3	243.43	36693800	6021725	302177	2497849	95569413	2506880	3513189	9670448	38710433	2524986	4134051	4855612	1105542	17699968	14360873	25342422	17457249	3193613	3116885	2007684	2431003	5402142	13669942	1097417	21748804	18081095	1400759	13038415	5363132	24612739	869743	73822869	194132	799460	3935617	2131767	444218	121598	320799
#N/A	2-Hydroxystearate	Lipid	Fatty Acid, Monohydroxy	HMDB0062549	Meta_420	7.116	299.259	[M-H]-	Negative_FA	1701193	186615164	14327785	2679618	6939282	465790375	10596129	2747543	17093991	24730170	7568625	5282431	8877956	4629670	21224442	3302328	31338105	12753872	4170384	15379117	8134232	7911356	15669478	19061314	8047148	13614387	15842862	4430884	16248574	9218846	32686764	2904869	20553559	3356323	3668612	7569402	8552144	4516454	2841142	2505009
#N/A	2-Hydroxyvaleric acid	Amino Acid	Leucine, Isoleucine and Valine Metabolism	HMDB0001863	Meta_51	1.427	117.055	[M-H]-	Positive	27.99	8098990	5063758	3275980	10255698	12592093	5470114	86225264	5180676	8238917	2867416	226318144	55929988	7704844	16393371	80102928	11241702	4825146	5938462	2883374	4767248	347130112	6767858	80031280	4552036	4381662	7879006	13022943	7029040	2411422	2247885	28614044	14065432	18429678	4318794	4178310	6670701	128782680	72195568	2981938
#N/A	2-Isopropylmalic acid	Amino Acid	Leucine, Isoleucine and Valine Metabolism	HMDB0000402	Meta_194	4.096	175.06	[M-H]-	Negative_FA	205.2	25511760	96278488	7172430	149614688	137411152	152171088	6952740	31879278	51965952	5806008	123281936	58129148	47773688	1050101056	13871924	33700008	43335784	52886788	73293976	74927824	279209984	81675608	33972096	74829304	135265520	66915000	31560090	71148216	118354952	18697180	13911871	21218006	42016660	133190384	16055542	70429400	129535216	77173736	27325526
#N/A	2-Methylbutyrylcarnitine (C5)	Amino Acid	Leucine, Isoleucine and Valine Metabolism	HMDB0000378	Meta_331	4.187	246.17	[M+H]+	Positive	268854	0	16629982	116105	9379040	79798	15484162	931386	14929651	792892	1528389	3817323	5847848	940649	1334786	286848	513371	2250381	191247	12126840	3925393	13206340	4322280	1539590	15062739	0	2213320	9062700	188825	8622640	0	215227	0	3032802	0	0	432093	1924328	2970938	292813
#N/A	2-Methylcitrate/Homocitrate	Carbohydrate	Citrate cycle (TCA cycle)	HMDB0003518	Meta_261	0.839	205.035	[M-H]-	Negative_NH4HCO3	62.84	2195194	2735691	96639	126890	10243629	1057027	34197	372710	265361	66348	1431643	169132	2276403	16981106	541423	1081605	963110	20444	1013463	3219058	3629227	2142043	936423	769535	543819	219450	3630516	1822239	5853659	477770	154541	1022947	340209	2555667	50291	1341953	44485	169889	102006
#N/A	2-Methylcytidine	Nucleotide	Pyrimidine Metabolism, Cytidine containing	HMDB0242132	Meta_352	1.231	258.119	[M+H]+	Positive	41157	636629	3455976	0	6720927	0	4661380	64597	8095322	605003	1085289	1257790	314994	213713	4192507	0	69642	6202227	0	4305279	1257756	151490	66138	570535	3729574	2143326	4463551	1540964	51562124	5823352	19503562	0	108946	21489310	429012	86225	350623	9274659	82286444	141644
#N/A	2-Phosphoglyceric Acid	Carbohydrate	Glycolysis, Gluconeogenesis, and Pyruvate Metabolism	HMDB0000362	Meta_219	0.856	184.985	[M-H]-	Negative_NH4HCO3	18.76	34794	759351	0	20057	0	1341193	22043	94046	0	210835	51348	141397	1660153	4265503	0	0	149562	0	269273	101791	0	831515	43887	1463895	241904	0	41569	0	718627	48806	18208	0	36197	0	0	0	57628	160560	124629
#N/A	2-Piperidinone	Xenobiotics	Natural Product/Food/Plant	HMDB0011749	Meta_20	2.2	100.076	[M+H]+	Positive	6034.76	19891294208	2378427136	537574528	30043662336	13322088448	15839254528	11484290048	20026775552	2634620672	9747598336	7878548992	12090939392	2979556864	88964423680	17538555904	10365644800	39814385664	2945394688	18597345280	3248256256	1839907072	20264556544	25790375936	9745293312	33344917504	3250069248	14303746048	52162904064	11902099456	20332892160	6817249792	21204207616	7409230336	5708824576	16171038720	4665925632	2114389888	1364705792	1031953408
#N/A	3-(3-Hydroxyphenyl)propionic acid sulfate	Unclassified	Unclassified		Meta_325	3.657	245.013	[M-H]-	Negative_FA	16.43	1180458	0	0	9055148	4822156	83988	0	844817	605892	16454	0	92737	0	5425706	18882	133326	1926229	0	20122	42529	0	457515	361980	189812	2649277	1610838	21927	1053981	38807	3785111	0	672347	187678	0	880912	42104	0	28890	0
#N/A	3-AMINO-4-HYDROXYBENZOIC ACID	Secondary metabolites	Biosynthesis of secondary metabolites	HMDB0304941	Meta_137	2.107	152.034	[M-H]-	Negative_FA	24.43	1450690	1195150	139754	7603600	2514758	3780349	336317	2151552	3318744	593614	1496101	743344	935007	53272024	194241	1591172	5617216	340524	3418681	1744374	8264128	3454144	2002011	1753470	3622635	990947	1537374	1761862	2524758	5962928	1008171	595912	4789806	20003	323889	672978	1673989	242214	194685
#N/A	3-Carboxy-4-Methyl-5-Propyl-2-Furanpropanoate (CMPF)	Lipid	Fatty Acid, Dicarboxylate	HMDB0061112	Meta_311	6.272	239.09	[M-H]-	Negative_FA	36.46	7030214	2645681	699468	3141086	5639680	7179642	1086140	2377416	5670560	1105502	5278012	5425056	1787515	12192240	676362	1159313	6341657	2006064	1925286	2865100	8706915	2904098	1427614	1584043	2919718	4520438	4223450	2802759	708503	4122434	523725	2033532	388424	966926	2428310	1002937	1389958	354949	1105308
#N/A	3-Hydroxy-3-Methylglutaric Acid	Amino Acid	Leucine, Isoleucine and Valine Metabolism	HMDB0029169	Meta_154	1.481	161.045	[M-H]-	Negative_FA	63.94	9414796	3244409	2103428	23703396	16306821	6710481	13529872	12977922	13899501	4677388	204380336	6314254	2899421	32557530	5773858	13643426	13858213	4050140	6521648	4339350	697866688	12695508	9955927	4963837	7896304	10899478	4245890	11160036	5442784	3800122	32343172	5212695	46897360	3948929	7868860	9385882	16871722	255861984	3356977
#N/A	3-Hydroxy-l-kynurenine	Amino Acid	Tryptophan Metabolism	HMDB0011631	Meta_293	1.26	225.084	[M+H]+	Positive	15.21	0	0	0	4284857	255595	3527260	1489158	3691629	87366	4104867	146678	2478270	0	0	0	0	166005	113124	4995814	1039625	6213916	104156	269679	1816858	141145	71554	0	0	2043300	0	98462	0	1015449	0	140644	171892	1437696	533504	248414
#N/A	3-Hydroxybutyric Acid	Lipid	Ketone Bodies	HMDB0000011	Meta_29	1.381	103.039	[M-H]-	Negative_FA	42.92	14265702	326487	726913	17710847	10450164	4107588	339624	8352428	15075990	1661045	140400292	5032567	2673379	241394302	563405	1911208	15246634	4419333	1803833	5298894	478445996	544855	11906085	2435814	23939336	16205927	6623612	2086349	2263152	382783	4631610	1025891	116520311	5390808	1407344	3439586	16306828	9258185	3836319
#N/A	3-Hydroxybutyrylcarnitine	Lipid	Fatty Acid Metabolism (Acyl Carnitine)	HMDB0013127	Meta_336	1.468	248.15	[M+H]+	Positive	40.19	752762	3230227	57568	3212544	89313	3566909	274728	3399680	212225	5466687	6418730	9316750	970061	28357365	0	1915908	50484052	263191	787665	1964124	0	818577	3042090	3917011	15290193	368151	5432964	751174	14372133	0	362674	0	44730	494600	0	436191	32147532	4058053	1779214
#N/A	3-Hydroxycotinine	Xenobiotics	Tobaco Metabolite	HMDB0001390	Meta_240	1.298	193.097	[M+H]+	Positive	58.05	0	402395	0	1400471	89590	0	4280781	166554	65262	0	20055675	16965450	51990	178209	83971539	203454	0	9740664	133110	60311	17251641	79814	52307396	369966	0	116922	28301585	1664952	168490	74450	4433176	1338605	49141	0	526355	0	2023592	111184	0
#N/A	3-Hydroxydecanoate	Lipid	Fatty Acid, Monohydroxy	HMDB0002203	Meta_225	7.351	187.133	[M-H]-	Negative_NH4HCO3	21.11	690975	621431	155444	485367	1593789	1721491	360148	492013	220841	222607	497437	366019	172875	838558	625343	243952	602681	339172	737650	361224	815067	724536	442671	526728	752713	67243	424929	2819319	836259	1475251	64654	1322639	321344	745250	763474	252336	49735	109781	1169200
#N/A	3-Hydroxylaurate	Lipid	Fatty Acid, Monohydroxy	HMDB0000387	Meta_278	7.554	215.165	[M-H]-	Negative_NH4HCO3	40.35	349463	52271	42532	28512	659104	77555	1417995	156154	293742	50280	597619	60869	36397	234014	153975	211155	60107	92051	22152	20463	2067478	109851	23647	117246	194306	145728	54217	604542	30739	522770	90803	624247	50942	34234	94836	283874	32486	63717	71852
#N/A	3-Hydroxyphenylalanine	Amino Acid	Phenylalanine Metabolism	HMDB0059720	Meta_205	2.585	180.066	[M-H]-	Negative_NH4HCO3	13.89	117667	20241	0	24698	183453	49864	50437	123219	37365	18611	33503	247713	20967	1003786	28621	564357	785659	0	78137	0	103256	145360	122980	28748	963699	0	0	24591	55039	795223	0	0	0	0	22234	21565	0	0	0
#N/A	3-Indolepropionic Acid	Amino Acid	Tryptophan Metabolism	HMDB0002302	Meta_236	5.997	190.086	[M+H]+	Positive	2361.7	16601614	7324868	697651	12871400	56710107	9026126	4011615	17123095	33245	16366186	6981418	3900605	2137101	50537651	20492196	10301275	18107001	1704036	9662685	5289205	10753535	25135136	16553269	5065477	12909533	125559	7824192	56347604	6273487	51845212	4588966	22714912	127404	830149	86225726	2544425	474162	0	659196
#N/A	3-Indoxyl Sulfate	Amino Acid	Tryptophan Metabolism	HMDB0000682	Meta_271	3.785	212.002	[M-H]-	Negative_FA	13.37	844846	168414	18817	14767905	3638767	3223321	21034	2794606	670797	433844	180065	335159	161401	17721610	393339	1428225	2058337	457852	629585	738858	0	2404114	1690496	1366147	2211456	1498439	551452	1539838	1439844	759985	329402	264130	0	241728	768564	1869824	435158	24121	414562
#N/A	3-METHYL-2-OXINDOLE	Xenobiotics	Chemical	HMDB0304943	Meta_130	5.784	148.076	[M+H]+	Positive	33.47	11006754	373912	306585	5758274	50660	220371	41769	12842027	5327235	942706	1243605	1147265	41130	1342170	1826131	1481325	2746192	168894	0	32354	16558251	581820	2404788	0	883484	5159826	1384770	4527090	3121358	4257096	239546	3009367	100971919	0	8637479	613874	1673380	14428039	53598
#N/A	3-METHYLCATECHOL	Xenobiotics	Benzoate Metabolism	HMDB0301753	Meta_69	3.131	123.044	[M-H]-	Negative_FA	23.88	95118	202605	84713	9208801	367124	42951	126671	81659	17924	43212	1118329	152808	148399	695644	42656	149447	74846	204376	35067	40930	236212	69510	367154	53946	67280	43514	327142	62639	179295	134155	127192	100150	57068	23612	2373616	130133	19261	56104	188155
#N/A	3-METHYLSALICYLIC ACID	Unclassified	Unclassified		Meta_135	4.113	151.039	[M-H]-	Negative_FA	289.61	251201840	5173688	3148382	286000000	84842536	31842352	102794184	80413944	6719188	39334768	101643952	46337524	2863293	214737296	150728144	81253752	175269056	41099100	45655436	11860990	73332704	83403176	132366032	21138526	218788144	7783798	95109056	255032256	53743604	109323648	13515659	137576576	12646863	35260252	127520224	11816498	40688184	4022300	5657724
#N/A	3-Methylindole	Xenobiotics	Natural Product/Food/Plant	HMDB0000466	Meta_94	3.318	132.081	[M+H]+	Positive	11.11	22513393	6126597	49558	15018427	15791716	4788640	9742035	19440003	9503339	675586	872259	7513334	589444	36887075	36517948	4703339	2133029	646826	6837649	1387787	1259615	3154990	21667376	5481936	10753406	9016827	2312038	7083680	4306394	1925149	570464	147065	810224	45681	5669818	1311511	1073788	352884	2135217
#N/A	3-O-Feruloylquinic acid	Unclassified	Unclassified		Meta_462	4.538	367.104	[M-H]-	Negative_FA	129047	700718	0	0	6816531	96397	0	0	0	0	0	92809	0	4248833	31221	0	0	0	18785	25015	0	225624	0	0	0	24572	0	0	0	0	19146	0	111228	0	0	42598	154457	0	0	0
#N/A	3-Phenylpropionic Acid	Xenobiotics	Benzoate Metabolism	HMDB0000764	Meta_133	4.689	149.06	[M-H]-	Negative_NH4HCO3	3025.65	1017988760	31863739	32262255	151541619	1349074709	848027529	38690735	1253319289	3148202	424283179	102896871	169759860	2962273	1584527071	682519500	609343037	1245963136	37781054	502652103	212574054	131234482	1161543665	552267445	210625112	366091654	14205108	143949187	3843370186	269073855	2961963823	101469654	179616874	100852298	582819	2098667701	59376367	4199687	34213643	55273588
#N/A	3-Sulfo-L-Alanine	Amino Acid	Methionine, Cysteine, SAM and Taurine Metabolism	HMDB0002757	Meta_174	0.91	167.996	[M-H]-	Negative_NH4HCO3	54.04	4014992	965553	216425	2391310	532808	421798	824928	3894996	6421121	294121	1519016	1915370	819540	125347	1344479	2379655	2049561	197629	223629	435411	0	860163	1424710	274647	561551	3787978	627719	720872	2348753	2536573	219079	866397	4027672	286436	5198067	716830	1975188	739230	211881
#N/A	3-hydroxybenzaldehyde	Xenobiotics	Chemical		Meta_64	1.313	121.028	[M-H]-	Negative_NH4HCO3	58.44	44382482	2706147	445336	68089173	14713077	5050067	9059801	15913611	1578136	6055117	6380652	5342433	437417	59639497	30039677	16550361	41745258	8153706	6529094	2056301	547265	15393326	11698592	2800429	60075473	1523369	17387669	43135059	6685974	17334958	1453736	21517078	1380182	7980931	21948586	1316895	8305137	697148	1458032
#N/A	3_24_dihydroxyphenyl_propionic_acid	Unclassified	Unclassified		Meta_209	4.912	181.05	[M-H]-	Negative_FA	23.67	10577743	2130612	420129	27318888	19511646	3576709	3504558	5218228	274881	1857859	21978848	7221214	1843067	11960472	9464350	6432694	8745272	1743000	3436210	1622469	62399440	7314046	7736514	1568188	11121742	740801	2032011	15107555	3446060	14472569	629932	9875238	1932615	1384796	18833286	1542985	1730234	705077	502351
#N/A	4-Aminohippuric acid	Xenobiotics	Benzoate Metabolism	HMDB0001867	Meta_243	3.053	195.074	[M+H]+	Positive	14.72	0	0	0	50898	332320	1610648	721997	2183561	0	1618717	1748644	0	50685	128732982	0	39265	53499	2608608	11925262	515530	383590	903796	8855751	5146359	1420609	24899	0	3976031	1787204	0	0	0	535309	0	0	607678	165964	0	1953032
#N/A	4-Guanidinobutanoate	Amino Acid	Urea cycle; Arginine and Proline Metabolism	HMDB0003464	Meta_122	1.239	146.092	[M+H]+	Positive	68.46	33920296	34616604	369205	26326010	26470256	8718777	10569795	20716014	9450765	12260294	161158736	32385256	39307404	24611632	12797223	9286111	56599780	23929478	11884690	7123013	400260224	10724411	23851762	13758928	16916090	9506992	15087405	10027403	22240456	11994112	7187326	7691410	43598724	5352010	12072860	5159672	6038666	6327874	5371173
#N/A	4-Hydroxyquinoline	Xenobiotics	Natural Product/Food/Plant	HMDB0246466	Meta_120	4.743	146.06	[M+H]+	Positive	27.25	11665492	455747	44687	43987876	9196750	1877589	1140539	37677952	5321082	1845859	20668360	1868528	3679	14456823	4807996	13122162	14070011	129139	1066623	362579	11638568	4408355	8204474	441068	10558524	4851434	2288849	14452429	10086322	17521300	435636	7441303	40527244	81289	9870529	1263402	2999907	2796601	64475
#N/A	4-methyl-2-oxopentanoate	Amino Acid	Leucine, Isoleucine and Valine Metabolism	HMDB0000695	Meta_79	4.36	129.055	[M-H]-	Negative_FA	369.38	78994144	11106290	229509856	443682816	445382304	64542928	75902040	161257664	197244032	85303952	55185968	206213024	44966316	301327424	68160088	188226064	284889248	26043076	37169752	18051878	87208160	37208756	233935264	199877792	41946780	372529632	80822992	61976244	42792484	39194920	12398366	874387904	77999152	480367104	211946464	68023408	109734264	31633908	14242566
#N/A	5,6-Dihydrouracil	Nucleotide	Pyrimidine Metabolism, Uracil containing	HMDB0000076	Meta_43	1.282	115.039	[M+H]+	Positive	53.33	11178896	68208	1720559	595903	34791301	22890014	173115	15610074	39553348	4039999	4818833	220744	13707001	15276313	1314018	12194343	354654	1088416	27333854	13927022	1371131621	9629804	27526212	14514583	303025	41932062	20398626	13185718	239262	78776	2186957	15306444	35776763	3651702	394388	995958	15804524	46012345	750024
#N/A	5-Carboxy-cytosine	Unclassified	Unclassified		Meta_144	1.147	156.042	[M+H]+	Positive	382.44	115288255	239336219	21921588	75253963	79679046	148485238	48145069	86846916	41731294	56944256	94709095	112042798	60694430	313591208	60058071	75591514	250381129	204690963	102853304	61104525	91400383	182735576	69227535	63669224	270778077	24443371	99363841	434959091	155946800	210545853	44932518	104964028	53885404	14874846	181806367	233346968	72677835	32046696	100350810
#N/A	5-Dodecenoic Acid (C12:1n7)	Lipid	Medium Chain Fatty Acid	HMDB0000529	Meta_247	7.729	197.154	[M-H]-	Negative_NH4HCO3	19.44	715263	833994	265811	205353	952329	615592	364265	278555	406570	164838	355563	313718	245278	869573	323545	358944	470863	414573	336592	477387	720783	608821	215473	498819	469658	221100	464825	827901	932898	780758	520060	5142616	161190	518330	265945	218955	260465	300695	237109
#N/A	5-Hydroxyindole	Xenobiotics	Natural Product/Food/Plant	HMDB0059805	Meta_99	5.157	134.06	[M+H]+	Positive	16.39	16526332	596467	838708	8250855	6621836	1061238	163717	6842151	3405935	839169	2084982	554493	86743	6250367	1473224	2707171	2762402	727938	158261	302968	5016414	1316914	3241075	400510	1695823	5035760	410888	9768108	165599	9527338	1545439	6226102	23203398	714177	4333432	1395374	1742984	2950138	1504100
#N/A	5-Hydroxyindoleacetate	Amino Acid	Tryptophan Metabolism	HMDB0000763	Meta_238	4.821	192.065	[M+H]+	Positive	19.5	6608350	0	45566	32166373	1557428	391837	410072	7941804	262580	39387	3335363	132333	0	6183250	2559109	1904946	1190560	0	192312	0	23814917	1301218	1936312	0	2004593	640840	1198439	8004560	9069602	10153228	0	4229935	23004143	46191	6879488	51304	1909518	1807475	0
#N/A	5-Methyluridine	Nucleotide	Pyrimidine Metabolism, Uracil containing	HMDB0000884	Meta_354	1.397	259.092	[M+H]+	Positive	9.88	667414	0	0	3331950	1060612	4085861	0	5064464	3732217	200954	0	15133	161986	25892632	105691	4669509	948158	0	2078274	648112	988	2469349	2250148	946256	2001223	3922768	2628365	118299	1367361	0	82644	0	1396489	3623098	0	0	1205297	527225	395109
#N/A	5-Valerolactone	Xenobiotics	Chemical		Meta_23	1.225	101.06	[M+H]+	Positive	497.19	3445130059	525547460	113184061	2866326452	1590673102	2392866394	628215405	2205715242	371411621	1097508937	889801825	2016540202	376242516	4807132346	1001194618	1571280902	4569097809	710769187	2288830684	885886873	86502817	3126729475	1721804094	1128100451	3243554324	393175513	1446301665	5350754165	1894071213	3340269964	472683993	748861657	792020382	677298895	1844319882	634962268	665071201	113305382	350835227
#N/A	6-Phosphonoglucono-D-lactone	Carbohydrate	Pentose phosphate pathway	HMDB0001127	Meta_349	0.901	257.005	[M-H]-	Negative_NH4HCO3	22.42	0	0	154171	0	1148657	0	0	0	1451189	849150	2365367	20364	0	0	0	1893357	0	0	0	38329	133716	0	0	18468	0	1049932	1081509	40559	451716	0	0	0	890155	0	0	0	69708	34611	0
#N/A	9-HODE	Lipid	Fatty Acid Metabolism (Linolenic acid metabolism)	HMDB0004670	Meta_414	6.876	295.228	[M-H]1-	Negative_FA	104533	59973080	49373716	5736984	16632339	148697632	30778234	4766376	37884448	576654208	20386838	29920050	30278924	6912778	102125456	11702497	33174578	32468804	27472004	46530208	15552762	79024680	395213088	25993978	21188080	181759328	466453088	12360663	21749850	13310901	51892000	6944741	100060456	2403999	6956526	10239030	25535650	16572420	5400342	2677050
#N/A	ALLOTHREONINE	Amino Acid	Glycine, Serine and Threonine Metabolism	HMDB00004041	Meta_54	0.995	118.058	[M-H]-	Negative_NH4HCO3	38.39	453681	17452	426363	139517	1492767	38125	703286	331062	3166406	366129	45592	197612	20420	2809604	42430	1847592	1572489	56325	98256	20860	1334681	277350	1109249	162518	257093	4905436	80575	88139	454795	649651	21040	21988	3316466	183050	652174	127511	103733	39417	27218
#N/A	ARABITOL	Unclassified	Unclassified		Meta_195	1.279	175.06	[M+Na]+	Negative_FA	51.11	5552706	136459	23629	80481832	5051728	10105040	26839816	8778662	10317080	8088354	96596416	3143822	3295249	732693	787432	7132470	22058934	16625036	4059227	2079048	50075392	20297700	3817034	4548919	2903026	12280877	1609737	2280451	4152617	2847108	174709	2769430	6751696	1953083	3673363	529778	6434722	3371110	105124
#N/A	Acesulfame	Xenobiotics	Natural Product/Food/Plant	HMDB0033585	Meta_158	1.901	161.986	[M-H]-	Negative_FA	1553.47	3132103	3543618177	0	367253	26349	0	192848	837079	225595	65953	0	0	22936	2745932	0	0	24253	20207	22797	59595	0	4706902	185896	19074719	367848187	33038	3224497	0	808163	231782	1866327	0	0	1613587	22396	21043	3562797	328724	0
#N/A	Adenosine	Nucleotide	Purine Metabolism, Adenine containing	HMDB0000050	Meta_374	1.444	268.103	[M+H]+	Positive	157879	7871550	2817102	0	6837439	24401368	1655197	89833	1953996	3779282	137430	1029086	0	24778427	6420817	1650737	2808525	229785	282194	2416492	2580106	351786	2801870	2628884	3888119	627542	2494348	1478945	1404937	3917395	124449	417273	943830	222502130	1207576	1489522	3269105	3384961	14707730	93946
#N/A	Adrenic Acid (C22:4n6)	Lipid	Long Chain Fatty Acid	HMDB0002226	Meta_450	10.549	331.268	[M-H]-	Negative_NH4HCO3	20.84	2826417	5677798	7638351	12130896	9249513	25142759	22303419	27122992	16227236	22197167	9664445	7296137	11251408	9736977	7443144	6608871	14808741	20972390	11392522	9771808	4804479	11345190	7413949	7389621	4433590	4712468	12022280	20574428	9612105	8604232	5613918	8285379	10402215	16132537	4355971	9099576	9314760	3440038	13459310
#N/A	Allantoin	Nucleotide	Purine Metabolism, (Hypo)Xanthine/Inosine containing	HMDB0000462	Meta_146	0.928	157.036	[M-H]-	Negative_NH4HCO3	91.94	10454	9535355	64048	178469	257852	574619	804710	3385525	5361312	946034	67608	426305	578388	1173951	548417	447175	1503114	102336	1459757	799436	252180	929021	241065	1388232	907946	4754044	1012459	1647415	3415782	90587	120740	95476	1619797	230725	0	2276028	1317729	739913	1381297
#N/A	Alpha-Aminobutyric Acid	Amino Acid	Methionine, Cysteine, SAM and Taurine Metabolism	HMDB0000452	Meta_24	1.013	102.055	[M-H]-	Negative_NH4HCO3	33.53	1828011	1772581	49139	2308566	3127593	648045	810460	1808404	3168113	593234	3184871	1568748	147391	2825850	1094203	2293571	4449566	1307837	864616	300228	650037	775420	1509785	468478	36785396	2763498	551850	2068582	8587057	13966452	77665	177781	1595614	131864	3113176	333215	11897389	2759932	198079
#N/A	Alpha-Hydroxyisocaproate	Amino Acid	Leucine, Isoleucine and Valine Metabolism	HMDB0000746	Meta_89	5.045	131.07	[M-H]-	Negative_FA	1415.51	1097014650	215394325	116065987	1464467084	5480307168	191373269	140413201	885288441	661003800	102927851	629054822	614372136	169077330	2218487889	821745390	2081923515	1787858728	295878778	164272245	81071801	141254783	321494386	1973630643	156972940	979683992	100026745	256655696	1088038663	399684903	1011806323	54029810	1089428719	753267977	352051962	1872603917	202493602	381108473	394381586	78391190
#N/A	Alpha-Ketobutyrate	Amino Acid	Methionine, Cysteine, SAM and Taurine Metabolism	HMDB0000005	Meta_21	1.06	101.023	[M-H]-	Negative_NH4HCO3	72.33	518760	1027300	378090	2908481	389892	1052925	724445	4896257	781949	600798	4234589	1572242	124273	757129	339813	350251	4098167	284794	1269405	789074	687121364	841340	941996	398217	979198	284725	1007148	568943	3315238	386517	512308	439997	20628247	247105	1693760	561602	1139926	23002886	576131
#N/A	Alpha/Gamma-Linolenic Acid (C18:3n3 or n6)	Lipid	Long Chain Fatty Acid	HMDB0001388	Meta_385	8.218	277.218	[M-H]-	Negative_NH4HCO3	19012.3	585503	998219	0	2244504	1776001	1061957	31128	344088	1483767	188017	1304192	1114810	24779	15491950	315268	1841558	922772	0	1015972	404546	27826609	2983620	449024	755442	10614710	35662	0	11920519	2991377	754688	0	3595615	27011	0	0	366775	30256	24206	29320
#N/A	Aminomalonic Acid	Amino Acid	Other Amino Acid Metabolism	HMDB0001147	Meta_53	1.616	118.022	[M-H]-	Negative_FA	114.61	1704966	10595225	1941164	1089361	6276820	8938319	15460741	7387249	2936404	2937369	36691492	24633254	1258844	59649436	1422423	1487511	147036240	1755472	18111466	1489676	127296912	25676606	3950108	23813622	10961858	3048574	3947166	8101781	61157216	10853400	1865225	1185075	64373672	2009516	1048230	1094848	44439652	54648692	2800014
#N/A	Aminovaleric acid	Unclassified	Unclassified		Meta_58	2.761	118.086	[M+H]+	Positive	44.31	2005486848	360704896	82935168	1259782784	842824448	1019394624	342910656	1294041984	333620416	580191808	540963072	1083249920	197429536	1073621376	662896512	1114878976	3665838336	301683968	1228487296	428971456	138363888	2342024192	806320000	594977088	2980392960	130191328	621853120	4107091712	1225660672	2822934272	229033312	487808320	199271616	239899696	1106150400	334811648	206329136	45998936	182440928
#N/A	Anthranilate	Amino Acid	Tryptophan Metabolism	HMDB0001123	Meta_61	5.038	120.045	[M+H-H2O]+	Positive	8.01	1952520	723859	49137	8897537	12979046	1761387	45181	1203235	493507	51318	1314283	387903	1194210	3907499	37134	1212095	1369609	1237894	961902	3269754	189198	4650946	1304532	954588	9213096	111054	989663	6704618	1702874	66462	46944	1249807	70734	783139	642982	2910728	2530491	217325	537468
#N/A	Argininosuccinic acid	Amino Acid	Urea cycle; Arginine and Proline Metabolism	HMDB0000052	Meta_406	0.83	291.13	[M+H]+	Positive	9.67	1116689	254949	138865	1195365	941658	5847014	0	4017876	722183	2252350	0	873569	902617	677350	0	0	1429576	1170920	3502302	1208390	528170	1274449	1075459	4937188	78434	27883	1857803	226660	533795	170233	108036	86145	830911	1818064	297737	1174836	0	50198	0
#N/A	Ascorbic Acid	Cofactors and Vitamins	Ascorbate and Aldarate Metabolism	HMDB0000044	Meta_192	0.824	175.024	[M-H]-	Negative_NH4HCO3	175.62	1203241	5581508	18555	8574563	3261111	2560876	759854	20646769	6152238	442268	48596120	1460024	834877	4443543	3258869	4615725	5052110	23541	697637	1140508	42464946	2445177	3630351	161492	57197865	1254249	682519	5717309	26588195	1035979	95151	1860800	32867969	112162	342057	378572	429776168	6896893	22647
#N/A	Asp-Glu	Peptide	Dipeptide	HMDB0028752	Meta_366	1.199	263.085	[M+H]+	Positive	68482	817190	0	0	0	597511	222169	110214	1247945	3391795	0	10850942	107735	74997	0	50338	202357	98586	97564	0	150982	9334034	188258	660205	0	108340	2260019	0	329988	0	58190	56946	303325	3346246	3255467	384592	1607870	1852188	121086	423206
#N/A	Asp-Phe	Peptide	Dipeptide	HMDB0000706	Meta_390	3.635	281.113	[M+H]+	Positive	41.99	4655482	33549	964580	7523723	9261574	852198	514332	427661	6359961	166356	252622511	133425	50572	7295495	772134	8239663	1454906	311961	1042065	294003	268172403	2456127	5036938	371433	1882333	6002418	5971852	104098	565998	4657295	46420	156641	12627742	286251	123655	321064	410522	105542	0
#N/A	Azelaic acid	Lipid	Medium Chain Fatty Acid	HMDB0000784	Meta_223	1.169	187.097	[M-H]-	Negative_NH4HCO3	36.61	2297149	3534103	452216	6542545	5069572	789438	700650	428509	3242713	498157	924617	1174349	2344258	932537	359572	4409753	875385	180177	740437	705299	874424	1868850	1615310	374858	1186136	1945567	3024625	467977	1027270	1987804	126968	589130	2156187	2276771	3664608	681592	1956629	688657	82066
#N/A	BENZYL ALCOHOL	Xenobiotics	Degradation of aromatic compounds	HMDB0003119	Meta_36	2.229	109.065	[M+H]+	Positive	8.33	5361720	128341	55900	5481675	14921650	4516728	113489	5435514	3036809	83899	881484	156916	489774	20555664	42149	5029222	6030333	678618	3623482	1212983	2163048	4161167	6404189	3545441	3955644	5635650	2021204	53054	83301	4028013	520563	175823	3959524	531452	431487	1201277	2207823	480772	62010
#N/A	Betaine	Amino Acid	Glycine, Serine and Threonine Metabolism	HMDB0000043	Meta_110	1.183	140.068	[M+Na]+	Positive	174.22	191797216	39551112	8789855	284748288	147318432	84551936	18039664	114284568	67023728	54083556	104934704	46678896	14553231	321312832	67541464	63368004	173493200	124577032	188930032	39552604	311558848	179898112	84611472	47551744	195793760	49358180	47910804	682974272	155104624	211950368	22737214	62801172	59699244	15887659	195322704	157661616	85444488	33066588	14427164
#N/A	Biliverdin	Cofactors and Vitamins	Hemoglobin and Porphyrin Metabolism	HMDB0001008	Meta_485	6.48	583.255	[M+H]+	Positive	516446	76674	2994441	0	0	2948504	3445433	0	51799	0	3447747	68995	728839	734442	12733826	291499	3727418	273511	1885043	919430	34371109	0	1994407	5626668	1225805	1075024	0	596787	333518	3454268	61220	41647	67940863	0	0	56833	0	0	0	2720291
#N/A	Butyrylcarnitine	Lipid	Fatty Acid Metabolism (Acyl Carnitine)	HMDB0002013	Meta_305	2.861	232.154	[M+H]+	Positive	20.01	0	14706830	1048409	8642442	150162	18317772	1005670	9201625	76018	4726374	4283880	4178428	1177024	2848824	0	0	2116919	37239	7595580	5871412	1423374	3050967	1734216	11811688	0	1778356	7093552	0	5701412	0	1440076	0	9063646	331628	0	479554	3147786	7590997	1103014
#N/A	C-Glycosyltryptophan	Amino Acid	Tryptophan Metabolism	HMDB0240296	Meta_463	1.975	367.149	[M+H]+	Positive	27914.4	2160592	1311161	270299	1529516	3517215	1988623	295438	1646492	3337088	639788	351055	181589	395194	7037400	96114	2293900	2307253	411786	1854693	431642	192712	1723602	1676285	1061791	1166532	3433916	1398785	188290	1610966	487094	106324	432564	1307074	158556	567514	624155	616730	342508	184878
#N/A	C12-AS (TENTATIVE)	Unclassified	Unclassified		Meta_369	6.773	265.147	[M-H]-	Negative_FA	11318.1	1479917527	619351200	33095512	479569008	76119813993	683839696	185533574	711811108	815103854	229544974	41254419	90468386	562800035	1772458365	35226346	65596170	113549932	208907345	921133678	60818505	39386951	587056198	94969655	509107978	2948526875	690064546	590772307	1745654539	154717461	26475521	20321569	430085125	37124627	385591081	228426274	127872559	76616634	25958144	49183406
#N/A	Caffeic Acid	Xenobiotics	Natural Product/Food/Plant	HMDB0001964	Meta_202	4.433	179.034	[M-H]-	Negative_FA	38.14	693830	1065663	899818	27386712	1149932	470149	1711105	543104	404231	441049	12969532	912644	22054128	1487085	482245	461405	322646	12595992	968814	426078	17440784	1308635	1371783	856285	21411256	926677	502439	475376	515609	433280	895002	485707	322973	475533	3095672	367961	529501	795502	825846
#N/A	Caffeine	Xenobiotics	Xanthine Metabolism	HMDB0001847	Meta_244	3.932	195.087	[M+H]+	Positive	1080.86	332533	0	2372060	895760	511531	0	974074	47329	601946	88468264	5619267072	1934920448	18956792	1801191	95163	127937	75525840	30602420	187664	149311	983842	222544848	76423504	769825216	105933336	2234060	27393416	1695649	92087	16894632	722784000	89708	369939	5668151	0	491647	109546128	416586	0
#N/A	Carboxyethyl-GABA	Amino Acid	Alanine, Aspartate and Glutamate Metabolism	HMDB0002201	Meta_200	1.358	176.092	[M+H]+	Positive	100.66	25459546	60594784	19523800	18625060	7239466	4760436	54531992	91923824	77782080	28266344	78229360	29019450	11767469	94301728	2823648	58346716	68540696	20249624	61802316	39594240	34355460	47213388	4440267	40240080	6677941	9444793	13236300	591834	85303872	17591112	24043902	1289150	381912448	1670144	3136906	10417328	20208388	5248348	85472720
#N/A	Carnitine	Lipid	Fatty Acid Metabolism (Acyl Carnitine)	HMDB0000062	Meta_161	1.179	162.113	[M+H]+	Positive	33499.4	7751140	170047062	18837270	38174609	5836123	99490032	57312747	115171221	142947950	61603805	63909163	96894756	80904814	43629283	32382661	103681044	55299042	17162919	75802211	55786608	22636461	35821943	53878493	92453942	4457413	129283409	107409600	12759478	56531639	16478239	30730382	10667009	64287122	23350912	4029105	33579277	4922332	172823705	70760450
#N/A	Carnosine	Peptide	Hybrid peptide	HMDB0000033	Meta_297	1.138	227.114	[M+H]+	Positive	21.86	10231534	688573	924428	4383384	6963996	9607425	3003403	7820030	14276552	6369983	2360742	2173629	251553	3923584	153668	11188928	14247923	85678	1153082	1576933	2191	3558480	4074430	4072058	1694868	11720755	3151735	1347221	3162842	3901765	53851	1582260	4131497	216230	1205786	399069	58551728	93509784	680057
#N/A	Catechol Sulfate	Xenobiotics	Benzoate Metabolism	HMDB0059724	Meta_229	2.363	188.985	[M-H]-	Negative_NH4HCO3	21.43	1091410	8375234	0	3207171	34295	1406360	1414052	2209068	873588	2457662	13533869	2434862	2114943	1417006	1138644	54862	48722432	59471	1645834	230027	5110084	2241715	1475679	4150872	14792122	218352	260724	0	775595	60188	1103955	0	103070	0	0	939249	0	25078	649819
#N/A	Choline	Lipid	Glycerolipid and Phospholipid Metabolism	HMDB0000097	Meta_32	1.138	104.107	[M]+	Positive	1304.88	4466617286	3753930443	660671162	1847073670	2979077241	1263660539	1474086648	2399294424	7169552677	1396174813	1074112816	2280081547	1418744849	1278936470	1947527253	566699172	2463994324	2516538150	1395195719	464898730	1064374340	2365515334	1283642237	1631373306	2641749080	6480234098	1934303484	85708444	1668984020	3050355361	1280432286	881599100	1514608675	1694248112	919685075	717389617	3048420266	2258488554	124274897
#N/A	Choline Phosphate	Lipid	Glycerolipid and Phospholipid Metabolism	HMDB0001565	Meta_216	1.14	184.073	[M]+	Positive	26.22	16960109	4736426	1867621	0	17124490	5533954	7136153	187285	13552287	675003	1500020	769009	69262	2850506	1076440	956560	1260129	5049048	17541156	8104563	2720729	1448776	2435423	8986574	234198	13684651	2811597	6786578	1042148	968590	4884303	1749439	11478379	521849	532404	6865199	11129416	3739982	7252514
#N/A	Citraconic Acid	Lipid	Fatty Acid, Dicarboxylate	HMDB0000634	Meta_78	0.894	129.018	[M-H]-	Negative_NH4HCO3	153.88	2214058	44225077	4139194	3636270	1384174	4040014	25144297	14784738	30926052	1959602	373456641	33667355	1526983	3105164	6122928	4669904	7933712	9304677	2494313	5261113	711215736	4883530	14360692	1728319	7306406	20545851	3823863	725145	8299095	279897	4492480	667295	21251651	20494491	1351436	5588384	54277209	14163260	9670377
#N/A	Citric Acid/Isocitric Acid	Carbohydrate	Citrate cycle (TCA cycle)	HMDB0000193	Meta_237	0.847	191.019	[M-H]-	Negative_NH4HCO3	106.17	42529	570151	393649	283475	561654	10508393	351907	571907	4423320	74780540	7213940	744454	1163901	5873184	44577	27660	482106	110312	809955	1815821	636752485	900323	1183897	3312864	1410842	537556	725094	212841	38553921	240206	121478	28003	4975996	99844	144163	362149	33841	1134933	767995
#N/A	Citrulline	Amino Acid	Urea cycle; Arginine and Proline Metabolism	HMDB0000904	Meta_148	1.23	159.076	[M+H-NH3]+	Positive	26.66	11484107	32221154	10157638	1233755	3022004	22711307	25023812	41672518	43132421	11503780	21713634	7489795	5658908	35913728	251495	22915447	20560824	3727270	22913907	18164733	9957996	17648867	8800180	17792523	3092909	24941183	15532237	341005	7082568	1518232	11988224	83119	2524847	3045482	1672518	1924095	9067441	38563919	48316071
#N/A	Cortisol	Lipid	Corticosteroids	HMDB0000063	Meta_460	5.647	363.195	[M+H]+	Positive	16.15	36739	0	335159	432242	3586620	0	52740	0	965081	0	0	0	1557232	38088	60122	0	164499	0	1501447	37355	3210837	61068	384132	1681824	0	3944616	816153	2617633	84911	52487	37034	87268	48287	1289383	0	2012473	1558150	1221280	0
#N/A	Cortisone	Lipid	Corticosteroids	HMDB0002802	Meta_459	6.048	361.2	[M+H]+	Positive	11.73	1032331	664090	0	3959148	2916372	2208617	705776	3471604	170656	1414482	348494	2471288	1380666	2962467	2160239	1734373	1901215	543193	2171849	1250832	1154969	1184684	1808498	3828380	1003087	169955	1080287	6731504	934328	757179	316954	1004844	1687501	418013	567448	2707367	937954	128004	538865
#N/A	Cotinine	Xenobiotics	Tobaco Metabolite	HMDB0001046	Meta_201	1.435	177.102	[M+H]+	Positive	489.29	0	1626998	598195	607361	1762478	603363	37164302	746776	55397	56646	189155934	284764640	63593	191702	503217800	357698	390520	98800128	311026	158020	258269456	439392	393077370	1953977	1137401	168700	181077413	86930	1006809	77000	51347378	17337063	2693635	219566	1025684	1385852	57212033	153057	4915886
#N/A	Creatine	Amino Acid	Creatine Metabolism	HMDB0000064	Meta_95	1.244	132.081	[M+H]+	Positive	338.9	193066992	232915360	26071220	174495360	66825188	277578816	647491712	325926976	824517312	139149216	173821072	511755648	177144304	210237584	637879168	260959440	219734528	78296592	205842688	162497120	75035976	123108456	596369216	212183648	321028544	729441280	274861824	55909600	162440480	91376232	134940800	78804440	147219504	10369780	21746284	271334560	1642908288	2210909696	187256704
#N/A	Creatinine	Amino Acid	Creatine Metabolism	HMDB0000562	Meta_40	1.191	114.066	[M+H]+	Positive	99.2	96302576	100366504	21114392	220682528	80381936	205514272	57412484	372931584	177389200	143679200	84917928	159116144	93873816	203590288	161220608	141836576	196068608	71087008	239661056	144663568	55207976	124865904	258804352	154921360	241117872	152979008	224355520	118506488	143292224	219271520	41970036	152445024	66486568	52431356	112832816	161263728	415279232	628151808	178766560
#N/A	Cyclo(L-Val-L-Pro)	Peptide	Dipeptide	HMDB0240493	Meta_246	3.932	197.128	[M+H]+	Positive	28	14218853	4565428	1158554	22368206	20049016	17757502	12045786	9382040	7587316	8411607	10493314	13330325	4572610	35751064	15414691	9288711	14002843	8619440	13468516	10567153	21548366	17317062	19560928	21431344	18276274	9258645	11041393	17223258	3745690	18003228	3678080	6111598	14697354	2711924	4733588	5167220	7639798	856357	1959108
#N/A	Cyclo(Leu-Pro)	Peptide	Dipeptide	HMDB0034276	Meta_270	5.012	211.144	[M+H]+	Positive	27.58	17737540	4253881	1069403	13020472	13223588	17401006	5373645	8470898	3009680	9984248	7342331	17381586	4386424	24950380	14447716	2504349	19855388	8613884	15737023	8050354	19996126	13830620	15397330	23187990	13453673	3639866	8367310	12194855	3572230	12141365	3036674	3172396	2483364	1524211	4417488	6980066	8151790	1297241	2066589
#N/A	Cysteine S-sulfate	Amino Acid	Methionine, Cysteine, SAM and Taurine Metabolism	HMDB0000731	Meta_250	0.909	199.969	[M-H]-	Negative_NH4HCO3	18.22	10932	45986	0	0	15433	0	0	124368	0	0	0	0	0	0	391017	108461	0	16477	11612	0	0	0	194530	20553	0	0	14319	96335	0	0	0	0	0	0	73167	0	86694	21396	0
#N/A	Cystine	Amino Acid	Methionine, Cysteine, SAM and Taurine Metabolism	HMDB0000192	Meta_310	0.944	239.011	[M-H]-	Negative_NH4HCO3	86.93	0	0	0	0	0	0	0	19841	0	0	3073752	0	0	0	0	0	0	0	0	39219	4836098	0	0	0	0	0	0	42157	0	0	0	0	0	0	0	0	0	0	0
#N/A	Cytosine	Nucleotide	Pyrimidine Metabolism, Cytidine containing	HMDB0000630	Meta_37	1.24	112.051	[M+H]+	Positive	8.63	42771352	10988392	3867659	25573448	180853728	30917670	7726152	60252852	55637484	8548469	12221787	5981793	59642964	24810306	4639016	66393272	18696380	6765416	17666218	25879352	6896178	30876896	35669376	12758935	13107918	53703152	16976702	12109374	33054120	8082573	3124358	7012722	64974960	27872298	9199495	15793224	7625846	13363101	5471893
#N/A	D-Gluconic Acid	Carbohydrate	Pentose phosphate pathway	HMDB0000625	Meta_242	0.927	195.05	[M-H]-	Negative_NH4HCO3	163.19	753024	1193015	301663	873030	921706	880271	1891713	1368571	2980987	457269	13576508	1338714	2510450	1212924	569539	996007	1400250	715625	398962	524187	53485068	555173	587659	725131	3429484	1958213	712485	477078	1579089	569318	161232	580711	12359967	986103	227447	975396	2846862	6245547	373703
#N/A	D-Ribulose 1,5-Bisphosphate	Carbohydrate	Pentose phosphate pathway	HMDB0304322	Meta_431	0.94	308.97	[M-H]-	Negative_NH4HCO3	85.13	0	0	0	0	46969	61601	0	0	0	0	38193	20207	0	34455	0	21746	0	0	0	0	2291155	0	0	0	29038	0	0	11284	0	51261	20808	0	0	0	0	0	0	0	0
#N/A	D-Ribulose 5-Phosphate	Carbohydrate	Pentose phosphate pathway	HMDB0000618	Meta_300	0.9	229.012	[M-H]-	Negative_NH4HCO3	30.94	215201	0	0	706142	238183	41661	0	45564	52926	116022	1867848	128774	121647	166906	45614	45367	204573	0	265577	0	378850	119206	94709	86261	200784	0	35170	893034	72410	773593	0	0	580756	0	20130	35444	1072561	448930	0
#N/A	Daidzein	Xenobiotics	Natural Product/Food/Plant	HMDB0003312	Meta_345	5.934	255.064	[M+H]+	Positive	65.76	463652	28239586	53580	7717510	2876544	1410938	381631	1921874	657864	2067801	995991	1098264	11283498	2550860	80133071	3812837	53662	10163731	47177599	5904771	220392	172823	35954786	15471336	104826	46546	923411	2179947	63881	16974382	233272	1085306	103909	493549	25141562	855088	4962999	579454	487360
#N/A	Decenoate (10:1)	Lipid	Medium Chain Fatty Acid	HMDB0041012	Meta_179	7.499	169.122	[M-H]-	Negative_NH4HCO3	16.71	539612	301496	34094	74290	742253	93411	0	66994	185467	166211	61556	31354	102670	191540	54510	181514	2084419	143410	124927	0	995959	191592	31562	150392	288668	229248	86240	628490	546526	698283	72508	3192678	23593	518468	236553	220143	0	29677	23971
#N/A	Decenoylcarnitine	Lipid	Fatty Acid Metabolism (Acyl Carnitine)	HMDB0241072	Meta_440	6.556	314.24	[M+H]+	Positive	108698	2098840	1674434	272761	1340637	1689212	1511961	189341	477928	9425245	661020	652219	1089491	656116	1533839	242444	809500	1257204	709505	394135	605077	812968	857250	559118	1626496	7579998	6801414	436731	157033	400854	1910752	478757	3106884	1512037	284252	466604	369239	2082876	880011	319358
#N/A	Dehydrocorydaline	Unclassified	Unclassified		Meta_461	5.9	366.169	[M]+	Positive	75287	425961	45665	0	1470317	27958226	40654	44330	41579	0	146316	431190	268845	4310645	0	0	0	0	0	69533880	107244	0	197208	46166	21764163	0	0	0	357373	100444	0	33303	0	0	0	4391445	0	0	31771	0
#N/A	Dehydroepiandrosterone Sulfate (DHEA-S)	Lipid	Androgenic Steroids	HMDB0001032	Meta_464	7.356	367.159	[M-H]-	Negative_NH4HCO3	22372.6	64858	27624	0	30635	24118	280669	169939	670813	0	0	395353	230971	0	423201	146251	1007420	258453	0	265952	28565	143268	213637	293528	102522	403648	0	216241	517744	436107	425845	0	77391	0	0	26130	44210	0	0	0
#N/A	Deoxyadenosine	Nucleotide	Purine Metabolism, Adenine containing	HMDB0000101	Meta_342	1.44	252.109	[M+H]+	Positive	246518	16457061	5895468	51082	18210872	114981409	3605181	147198	4559181	63580	260857	1885491	183493	77839158	1968779	5223252	13120717	478534	105805	16080571	8004069	2641031	11226531	8571576	10567491	116983	847191	1293327	1185316	4683176	977080	811183	50439	4747944	702862	1924216	4249988	2345361	0	689733
#N/A	Deoxycarnitine	Lipid	Fatty Acid Metabolism (Acyl Carnitine)	HMDB0001161	Meta_123	1.188	146.117	[M+H]+	Positive	655.09	315394688	254868544	16617347	288842720	912903936	182293104	98539152	252860976	254193088	128145392	162378352	262974096	83374664	270368512	305427424	614841856	368472896	255840144	215089024	89646720	32235236	233558960	394955232	163345088	511173952	259566512	235786272	746519296	158008480	627533888	67605688	533646368	130331848	156327600	425919456	556661440	185422576	306758368	63966240
#N/A	Deoxycytidine	Nucleotide	Pyrimidine Metabolism, Cytidine containing	HMDB0000014	Meta_299	1.248	228.098	[M+H]+	Positive	21.88	2291666	75306	0	3581276	14307423	2155783	2259544	5401361	619670	247217	3451099	1340295	3594523	1232994	93486	4742756	607666	800251	2143820	2324758	21432356	1938981	2837323	569981	162796	58880	570335	4321255	1286315	722947	0	0	7444591	955053	0	1916309	3015898	2342936	585271
#N/A	Deoxyguanosine	Nucleotide	Purine Metabolism, Guanine containing	HMDB0000085	Meta_372	0.923	266.004	[M-H]-	Negative_NH4HCO3	58.69	0	0	0	0	31105	0	437569	84799	653111	0	101612	108430	0	0	0	67464	231639	0	0	45868	553892	0	12666	31990	141971	384707	27343	0	184401	0	22454	0	416715	0	0	0	3935195	3407300	0
#N/A	Diethyl-phthalate	Unclassified	Unclassified		Meta_287	6.318	221.081	[M-H]-	Negative_FA	139.75	33325454	6277634	2329058	7831587	56734782	3749554	1746567	14635669	9089990	1360292	2703312	2454618	6043506	13932382	3611065	14494926	5882915	5116885	21487150	5108518	2850828	7329473	10271413	8681499	13899568	10198434	8448693	11921868	4055257	13826874	2843448	15570083	2113159	41225463	38766427	54228429	3416566	3381161	6403186
#N/A	Dimethylarginine (SDMA + ADMA)	Amino Acid	Urea cycle; Arginine and Proline Metabolism	HMDB0001539	Meta_259	1.163	203.15	[M+H]+	Positive	4957.87	34512193	14176087	763545	13602165	64271937	7149441	2353485	4041150	11651809	2725457	8381794	2524149	12935093	35265028	9026534	37688375	5248875	4300624	4774132	3983226	235291	8158059	15398535	3245195	22976578	9743372	12355191	22303636	12863403	42508682	1886455	7356075	3362936	2890652	26358675	9180961	1475143	2492994	2849420
#N/A	Ectoine	Xenobiotics	Natural Product/Food/Plant	METPA0797	Meta_112	1.262	143.082	[M+H]+	Positive	41.16	1124577	1635671	409692	717579	4171818	487209	9478050	4640939	2261808	65724	158906688	1746711	1723386	18277508	2039857	218607	712632	1446617	679142	1737940	422939239	2376019	1280520	1257679	360733	7872962	1559513	1350318	321181	282107	1585201	4440023	9552690	1893620	538057	2037367	2342319	8959173	119803
#N/A	Eicosanedioate (C20-DC)	Lipid	Fatty Acid, Dicarboxylate	HMDB0242141	Meta_456	7.406	341.269	[M-H]-	Negative_FA	118574	929532	309587	77973	108520	1418724	788228	0	618677	381002	143111	0	123821	325727	1355643	31983	158717	151666	0	1178403	525521	1230908	759817	216526	537029	92521	0	41325	1328543	645167	324348	30381	1401727	0	216091	0	324282	51998	37974	31433
#N/A	Eicosapentaenoic Acid (C20:5n3 EPA)	Lipid	Long Chain Fatty Acid	HMDB0001999	Meta_424	7.897	301.217	[M-H]-	Negative_NH4HCO3	14.47	0	111336	0	0	442799	250493	0	0	30343	244408	0	0	0	24623	0	0	0	0	707481	26766	0	37457	0	41107	59432	0	0	0	0	28244	0	23200	0	0	0	32841	0	0	28257
#N/A	Ethanolamine	Lipid	Glycerolipid and Phospholipid Metabolism	HMDB0000149	Meta_2	1.143	62.0608	[M+H]+	Positive	93.43	1151659	35826777	4269593	8958474	403865	51778440	69607744	360961	144906966	53069894	33062919	58411169	742641	244636	10838870	136471	8668781	1792828	133461	5593894	13262529	15381636	13108930	97066239	1166450	145997358	14255033	696682	51532293	879838	35662405	798307	33196523	2300902	2277346	1115783	26913496	9857808	5218575
#N/A	Ethylmalonic acid	Lipid	Medium Chain Fatty Acid	HMDB0000622	Meta_86	2.544	131.034	[M-H]-	Negative_FA	41.39	11065057	532125	1041177	21112413	9608683	6681875	6727440	10034686	6092090	3607258	205954381	5263450	2753596	22921627	5911483	12732330	15508261	3866707	7149896	4249430	734078562	5972357	11917099	4456934	7228539	7510867	8651620	21963669	7050004	10332112	6890374	5941188	8924750	8130474	6562400	3935796	8178746	1248436	689780
#N/A	FA 18:2+2O	Lipid	Fatty Acid Metabolism ( Oxidized fatty acid)		Meta_436	7.587	311.222	[M-H]-	Negative_NH4HCO3	79.12	4699382	3865171	135576	735084	4367289	130149	480182	1659406	54498832	1464907	1867573	4565985	471016	1142796	676094	2258961	2771563	2035037	734235	496189	5849620	2524291	1710420	187034	24135606	20378520	645959	1192494	1731839	6202366	397646	7797567	2606315	318524	913360	450046	2651394	710700	311655
#N/A	Fructose 1,6-Bisphosphate	Carbohydrate	Glycolysis, Gluconeogenesis, and Pyruvate Metabolism	HMDB0001058	Meta_453	0.897	338.988	[M-H]-	Negative_NH4HCO3	14260.2	2214689	36527	22897	45040	124558	112440	0	272812	983507	0	0	45170	39565	1052986	576382	31633	0	0	301982	0	69368	121423	98317	54671	1100108	382224	0	0	72700	333400	45003	314228	162633	0	118328	0	0	122673	0
#N/A	Fumaric Acid	Carbohydrate	Citrate cycle (TCA cycle)	HMDB0000134	Meta_41	0.903	115	[M-H]-	Negative_NH4HCO3	123.95	5664404	1066150	1890936	687110	573254	854521	5294375	518261	1339038	921550	15101215	950754	517827	197118	935598	541587	513961	1707226	174235	823368	910042020	231171	786159	256867	99694	1202237	298647	195295	5623397	150175	158605	847052	1261731	1381971	126990	2716310	5579316	5716125	791544
#N/A	Gamma-Glutamyl-Cysteine	Peptide	Gamma-glutamyl Amino Acid	HMDB0001049	Meta_341	1.442	251.054	[M+H]+	Positive	28.23	4632012	1375424	0	0	13852559	0	391681	148835	72328	0	0	0	162944	473799	0	152223	257404	77727	149627	0	1024445	0	97565	0	0	201037	1348323	0	248213	85348	0	594422	0	69281	0	52558	133140	595200	41740
#N/A	Gamma-Glutamylglutamate	Peptide	Gamma-glutamyl Amino Acid	HMDB0011737	Meta_384	0.723	277.104	[M+H]+	Positive	13.81	1838739	0	0	1694997	1339115	2143855	206671	1592202	101873	103054	0	271996	1178422	700833	0	86448	1763995	1937130	2745972	2359079	110836	247329	1297239	2378030	0	75354	3850846	157696	239820	0	0	0	1882462	2278894	119476	1906783	0	46982	102369
#N/A	Gamma-Glutamyltyrosine	Peptide	Gamma-glutamyl Amino Acid	HMDB0011741	Meta_434	1.728	311.124	[M+H]+	Positive	32.98	7356728	422151	929803	2236129	7871728	14341788	10316399	7293861	9691176	3686096	73560	5782097	87224	13412628	461872	11102960	5259444	562473	5939783	2743507	189705	2535200	6274653	1210203	147016	10885072	4827967	51147	8856736	1278764	3343158	42298	6509959	326357	0	538052	532878	75514	3562044
#N/A	Genistein	Xenobiotics	Natural Product/Food/Plant	HMDB0003217	Meta_376	6.139	269.057	[M-H]-	Negative_FA	562311	1645624	39515700	89630	103345720	7831072	367910	1808639	677300	5680000	203267	7033122	528517	29087438	1601574	89669944	6501109	1779185	18882474	49222680	1045108	1466517	684121	50557284	16107377	1841179	6790327	1203494	4541994	2153578	210389	1131534	346807	32851	1213739	5648760	2973718	1894927	10506275	210248
#N/A	Gentisate	Amino Acid	Tyrosine Metabolism	HMDB0000152	Meta_138	1.447	153.018	[M-H]-	Negative_NH4HCO3	70.86	25904	0	0	5338065	486770	133333	2117705	25186	0	43564	18592029	2912239	1367300	3535475	2256722	348291	115201	5730733	76054	537005	40583879	4054998	1122331	317723	2309714	0	146530	23112	1072041	20829	126838	999006	25489	34357	1156121	590038	26300	0	20671
#N/A	Glu-Pro	Unclassified	Unclassified		Meta_296	1.291	227.1	[M-H2O+H]+	Positive	17.95	15519863	5576587	2922922	32830042	15301420	20066700	28622632	22765416	5849223	6854594	24539034	30666680	1163204	18625168	2926588	16147022	31942612	1512341	20432656	15476277	11812739	16263514	13264972	13248913	12423292	8529292	11365726	8003771	8921741	8020418	3785653	1909908	28123826	2854443	1685940	1087154	66806376	98930800	6520639
#N/A	Glucosamine 6-Phosphate	Carbohydrate	Amino sugar and Nucleotide sugar Metabolism	HMDB0001254	Meta_351	0.909	258.029	[M-H]-	Negative_NH4HCO3	48.56	0	0	22076	54757	25422	0	472637	0	723323	48603	1524064	962145	34366	0	0	30916	0	0	0	0	213471	0	57558	0	0	600732	0	0	454678	0	29871	25073	4463689	23384	519455	0	2719302	840401	28410
#N/A	Glucose	Carbohydrate	Glycolysis, Gluconeogenesis, and Pyruvate Metabolism	HMDB0000122	Meta_203	0.965	179.055	[M-H]-	Negative_NH4HCO3	708.64	1803640	3490018	500793	415679	483481	1031470	174167990	1882702	8583953	988505	3104172750	633287	5057086	763533	1217221	934391	3284588	506379	606989	1211900	462332440	4080798	538586	1193319	5670323	7296603	1127243	1307917	10148503	882293	781209	277204	59544051	791166	441181	247798	6618496	53509181	1323444
#N/A	Glucose 6-Phosphate/Fructose 6-Phosphate	Carbohydrate	Glycolysis, Gluconeogenesis, and Pyruvate Metabolism	HMDB0001401	Meta_353	0.893	259.022	[M-H]-	Negative_NH4HCO3	83.47	6145915	2582622	441638	7878457	9413051	3849132	1301074	2447035	19774154	5245868	1447906	1783982	1652438	7495825	376025	3124497	7218646	834180	2633532	758742	16092080	4367399	3186183	1489434	5402687	7522088	2432389	4066587	7616321	6233808	261965	1230410	11370348	154513	105060	177527	2607263	9815528	352929
#N/A	Glucuronate	Carbohydrate	Amino sugar and Nucleotide sugar Metabolism	HMDB0000127	Meta_239	0.921	193.035	[M-H]-	Negative_NH4HCO3	50.65	208406	506680	0	332020	130616	529166	309396	781622	2941111	483753	2255930	483461	7731985	190100	273021	1447377	586200	704151	470395	162986	6357625	94009	495852	163047	1656627	1498190	234655	543360	689605	61131	0	519708	1137425	1326825	53389	490023	139502	119886	112692
#N/A	Glutarate (C5-DC)	Lipid	Fatty Acid, Dicarboxylate	HMDB0000661	Meta_88	1.949	131.034	[M-H]-	Negative_FA	89.99	150777430	6619934	2379638	18668870	33207404	13334782	5077039	113397839	13699238	33590316	32459280	8578562	8872189	12914874	28002848	10861240	35925347	7486802	11652811	6386128	116870308	21489568	38557551	9958122	11287822	24238310	10212764	28044724	9109540	103145181	10950384	18292999	83859628	31628279	19360951	7681987	10055249	7512247	774681
#N/A	Gly-Pro	Unclassified	Unclassified		Meta_190	1.272	173.092	[M+H]+	Positive	99.08	14355095	53175040	11136881	129052623	7515284	182340233	127605355	177607323	29571941	57151674	102964622	118969526	6720910	72041718	14901234	19193161	129477895	2617782	174687549	59158162	41622496	153974367	80723874	175400332	82932121	32280002	49287057	24593524	61119361	8509805	33582665	2011919	32733905	11746431	2809053	3077583	26080214	10297379	31812761
#N/A	Glyceraldehyde 3-Phosphate	Carbohydrate	Glycolysis, Gluconeogenesis, and Pyruvate Metabolism	HMDB0001112	Meta_177	0.884	168.98	[M-H]-	Negative_NH4HCO3	49.89	1909351	1557588	163039	2681405	2966911	1140509	1135292	1036050	4590738	1011053	10504241	1811985	1888252	1557550	2717276	5900991	1821100	335771	734190	753227	19421848	1451319	3020361	407692	2520863	2429373	1796560	2356579	2476482	1394796	125331	1316060	4475239	4151773	5052577	1412770	586775	2231567	42126
#N/A	Glycerol 3-Phosphate	Lipid	Glycerolipid and Phospholipid Metabolism	HMDB0000126	Meta_182	1.14	171.006	[M-H]-	Negative_FA	22.3	4244028	7079912	6564400	4418430	9406744	10498032	3287026	4739050	5503564	10590372	3291924	9877583	9470738	6587752	488258	2778128	4416418	1217918	3489646	5505702	3264422	4823634	2590171	12778547	836255	11254448	3357054	623085	11073897	1106911	3173482	349602	17021600	4279098	297461	1294523	12252446	25794630	5476890
#N/A	Glycerophosphoethanolamine	Lipid	Glycerolipid and Phospholipid Metabolism	HMDB0000114	Meta_274	0.969	214.048	[M-H]-	Negative_NH4HCO3	25.9	2184821	611386	27962	540110	794936	1156875	17923	1319396	149244	250082	479161	5039015	0	9252025	625162	757281	8409543	23337	735464	125015	837743	3741732	881980	207373	5624717	49069	647451	7862859	1874054	5012281	21447	18222	3301675	0	1011648	40962	5508307	1283543	22656
#N/A	Glycerophosphoinositol	Lipid	Glycerolipid and Phospholipid Metabolism	HMDB0011649	Meta_451	0.912	333.063	[M-H]-	Negative_NH4HCO3	115984	0	86485	0	1968607	30057	143099	265580	0	334385	444420	2724383	1413492	0	0	0	0	0	32116	0	88108	7551884	0	0	0	0	201223	0	0	502305	0	0	23235	3675358	0	0	0	781876	327574	0
#N/A	Glycine	Amino Acid	Glycine, Serine and Threonine Metabolism	HMDB0000123	Meta_6	1.184	76.04	[M+H]+	Positive	12.05	127889064	185177105	124293219	16300772	9707849	91572265	206677886	39524017	84521144	53556144	109206414	124516273	62126861	269071323	103539732	36469387	44553622	46343320	77360759	45726331	103606232	26826114	54925792	55993941	85282360	69413407	92955286	46138975	253515501	87457220	58117316	59478386	26314643	47692325	47354440	21634661	98802636	34072231	284303350
#N/A	Glycocholic Acid	Lipid	Bile Acid, glycine conjungate	HMDB0000138	Meta_475	6.511	464.302	[M-H]-	Negative_FA	213571	537430	594958	0	382957	403483	260956	23291	0	14708130	0	276486	0	0	479740	0	0	709626	0	26747	0	0	0	39816	404523	727475	11343503	0	516477	104133	0	0	26759	0	0	0	28934	93261	0	516668
#N/A	Glycodeoxycholic Acid	Lipid	Bile Acid, glycine conjungate	HMDB0000631	Meta_473	6.677	448.307	[M-H]-	Negative_FA	295026	2612727	609912	0	682728	0	2027824	88830	138184	30068488	179905	950743	354140	31201	3308174	46309	31897	2737299	0	468953	163759	0	797699	252639	780554	272985	22616743	75208	1168096	641998	271475	46737	124108	51076	40611	66996	321939	47894	37107	739507
#N/A	Glycolic Acid	Carbohydrate	Glyoxylate and dicarboxylate metabolism	HMDB0000115	Meta_5	0.955	74.9608	[M-H]-	Negative_NH4HCO3	7.08	13302782	2276499	5386521	23250145	26447664	4497191	3150628	18263445	17972881	16110938	3767759	3604784	3026340	6284065	19371631	8860797	2756419	18152456	15306452	12485499	13449620	10109764	13995749	15062774	2331666	15639981	4108310	21560387	10633042	6292451	4220200	17313810	5421233	8112758	21544383	33502816	13415626	1285671	5555221
#N/A	Glycyrrhizin	Unclassified	Unclassified		Meta_497	6.421	823.41	[M+H]+	Positive	283923	1604253	867003	54099	7439364	2814445	45191	4270231	798973	52995	149427	222746	0	284536	0	0	46273	239821	0	1253500	0	6342367	43734	0	275456	134273	59029	0	244943	102635	62865	0	0	0	0	0	0	0	0	0
#N/A	Guanosine	Nucleotide	Purine Metabolism, Guanine containing	HMDB0000133	Meta_395	1.457	284.1	[M+H]+	Positive	195363	1084000	0	182202	2511408	2008415	773308	0	2101688	2034768	633688	0	140369	5448707	2544470	112797	5025022	2093667	0	409506	114592	5014872	1148591	1158803	859606	318583	1111285	399353	567179	841150	656515	0	276305	64791977	0	94474	222377	547017	1124565	0
#N/A	Heptanoic Acid (C7:0)	Lipid	Medium Chain Fatty Acid	HMDB0000666	Meta_81	6.634	129.091	[M-H]-	Negative_NH4HCO3	11.64	1079595	3431571	261457	546079	797289	700110	262045	558822	280384	686865	1047347	394269	278010	1205370	2607903	814546	1504121	875590	284997	348640	31003523	832556	1640296	360707	1218783	185265	541968	1922248	944627	2294390	175613	1781025	679723	445066	681825	2335849	62180	75875	260522
#N/A	Hesperetin	Xenobiotics	Natural Product/Food/Plant	HMDB0005782	Meta_423	6.75	301.071	[M-H]-	Negative_NH4HCO3	111.57	324814	0	0	175872	122499	0	35450	0	0	0	1093906	0	517366	0	0	4310708	25909	0	4941835	0	218186	0	1371324	1566775	0	0	0	0	2676467	0	0	0	0	2592851	35034441	0	0	0	24200
#N/A	Hexaconazole	Unclassified	Unclassified		Meta_439	1.27	314.084	[M+H]+	Positive	651889	0	82739	0	6093571	100226	0	7857000	0	7276137	4112899	10833798	2726104	1539975	0	101955	156100	0	186812	174204	6834345	94225640	83801	161844	6599177	0	7936895	0	0	188616	0	2109022	0	2443703	365765	171750	0	695368	1664834	0
#N/A	Hexanoylcarnitine	Lipid	Fatty Acid Metabolism (Acyl Carnitine)	HMDB0000756	Meta_359	5.427	260.186	[M+H]+	Positive	23034.2	44343	2501672	0	590466	0	2570917	0	1814827	0	520023	584191	1308860	39548	524639	0	0	65941	0	1689280	1213452	1354252	565774	37764	1963217	0	214516	1031198	0	1231082	0	0	0	533836	0	0	0	261111	785286	0
#N/A	Histamine	Amino Acid	Histidine Metabolism	HMDB0000870	Meta_38	1.065	112.087	[M+H]+	Positive	65.32	31097627	19616729	257944	23766710	42434893	4930392	31173642	4056542	43629342	7969600	223245264	41726636	2371543	429563	189200115	7433941	65689514	10307012	5179069	2777254	19591701	5817360	88872702	7017888	230507341	50876190	5934324	15180595	5690124	15020851	4898813	20509050	58573806	4715458	99098265	6349125	3562848	71070742	1695739
#N/A	Homovanillic Acid	Amino Acid	Tyrosine Metabolism	HMDB0000118	Meta_210	3.317	181.05	[M-H]-	Negative_FA	88.97	178536368	92707712	18445872	366849312	245887376	96321936	25194844	97472088	17616970	32243712	192268560	167997696	31595204	362804640	42773976	130393576	124813032	146474976	85830464	40495840	358283296	83124232	187612704	71077744	120662096	59170668	51840428	84978584	46283100	56918160	21257432	60642104	142679856	160978752	62732704	45316564	178105632	121840064	25913392
#N/A	Hydroxy-N6,N6,N6-Trimethyllysine	Amino Acid	Lysine Metabolism	HMDB0001422	Meta_264	1.062	205.155	[M+H]+	Positive	19.6	2381424	701995	0	137479	1369279	567542	368571	757497	315689	376846	448895	1362799	0	19998726	558071	1636188	2501654	99871	842036	347843	0	993786	1451644	621675	8695078	1106236	939204	2060057	1031806	5457621	165787	410804	602803	0	2336735	487181	0	0	209873
#N/A	Hydroxyhexanoycarnitine	Lipid	Fatty Acid Metabolism (Acyl Carnitine)	HMDB0013131	Meta_383	1.674	276.144	[M+H]+	Positive	25311.1	2687312	823108	0	563000	47652	234579	101896	1752262	111662	206045	55606795	0	958873	990752	43933	188428	441467	0	242042	77462	24933859	285413	109059	338642	103164	641104	48440	99475	143280	82281	50645	49631	55745	0	317431	155736	595016	726950	0
#N/A	Hydroxyphenyllactic Acid	Amino Acid	Tyrosine Metabolism	HMDB0000755	Meta_208	1.304	181.05	[M-H]-	Negative_NH4HCO3	1109.38	151995165	157786078	12791831	151306596	119076103	59924247	32683144	93014836	16154090	45269566	156769221	271032094	22600012	135769108	73738608	205339863	193852428	88365011	79034527	32452453	17108239	96987848	118158807	53284698	265897692	18984454	36045260	70208127	102946032	134098902	18121302	51673186	52320183	120767309	61258736	19188008	63633477	32641188	39084611
#N/A	Hydroxysuberic acid	Lipid	Fatty Acid, Monohydroxy	HMDB0000325	Meta_230	5.324	189.076	[M-H]-	Negative_FA	59.25	3481982	5779812	460351	7824456	12038355	5316902	605621	2548570	3900312	603391	5125708	2821336	4555421	34138164	2416104	4552047	3863932	5584228	3536546	4821819	12204201	6318795	3417467	3922193	21009156	4497468	2736969	3666924	4454366	2742364	997818	3170198	2229697	6542771	3070710	3690242	8011783	1890058	1177646
#N/A	Hypotaurine	Amino Acid	Methionine, Cysteine, SAM and Taurine Metabolism	HMDB0000965	Meta_35	1.312	108.02	[M-H]-	Negative_NH4HCO3	26.79	5582822	410502	50760	7792499	1778493	649787	2523639	2752640	168188	487351	1239593	708784	48725	7120245	1752232	2232129	5259100	583684	451246	485668	681425	1216210	2094515	198466	3601784	84882	1314856	3648243	1394531	2158992	339107	2795161	308728	654684	1720765	83967	717683	19025	239562
#N/A	Hypoxanthine	Nucleotide	Purine Metabolism, (Hypo)Xanthine/Inosine containing	HMDB0000157	Meta_105	1.418	137.046	[M+H]+	Positive	129.39	265281456	19584056	11967829	28188342	749880512	54433916	12322049	83891200	343900736	10505198	16961890	6807464	58585600	248194192	4520714	95699216	30658688	25136860	43848036	28681576	6228084	36640416	45304604	22307534	29155692	341509600	25848562	23597050	27583978	43607972	9744535	37972288	139566480	27269026	8882022	41081148	18853638	26175372	10877711
#N/A	Indole-3-acetaldehyde	Amino Acid	Tryptophan Metabolism	HMDB0001190	Meta_151	5.421	160.075	[M+H]+	Positive	10.31	4326814	355021	314543	2085927	5371665	199150	40306	1400889	85965	123966	1024247	659565	44706	2083009	1463775	3210136	1419958	468337	393748	36675	560483	751332	2200939	208332	171474	82796	307535	4359630	618478	5047570	0	7064189	49198	1160101	6697229	362779	41682	35150	44405
#N/A	Indole-3-carboxyaldehyde	Amino Acid	Tryptophan Metabolism		Meta_121	5.558	146.06	[M+H]+	Positive	34.96	57198900	2482208	4078127	29846008	29426104	5785482	3779464	28595494	19507714	3819966	5188740	1830033	1195836	63168144	12118872	13384751	15886877	2997380	5273142	1759618	16372003	9907808	12931823	2768580	14788838	20891120	6036234	56054168	17883104	47224592	475464	103489728	12080846	9064047	44661352	2463872	11510617	8180848	183311
#N/A	Indole-3-carboxylic Acid	Amino Acid	Tryptophan Metabolism	HMDB0003320	Meta_159	5.535	162.055	[M+H]+	Positive	10.57	6873214	250839	0	811395	1217623	139469	65992	6582817	2304457	56542	595933	50227	347073	865226	94197	1348874	1209336	353160	83851	131620	4032507	686439	546138	50847	722688	1334954	73171	4893278	1052312	4863775	38373	21608284	220410	695294	4910065	76806	704046	27308	48916
#N/A	Indole-3-ethanol	Xenobiotics	Natural Product/Food/Plant	HMDB0003447	Meta_160	5.754	162.091	[M+H]+	Positive	18.36	4170440	297699	0	5623487	4958130	96477	599666	2347942	123151	64924	1198782	226399	250968	2825241	1752211	599889	605659	1186366	141434	142739	14725786	761443	614179	155037	4981497	526547	811011	3614100	153193	4860831	94030	4131130	44968	2105670	6174682	626626	947935	129364	0
#N/A	Indoleacetic Acid	Amino Acid	Tryptophan Metabolism	HMDB0000197	Meta_199	5.749	176.07	[M+H]+	Positive	800.08	213748040	5493668	3642023	602537499	220180321	101498771	178042175	174949168	31164	112043327	57375460	29481870	21794319	910317572	488896899	99248270	265117307	25843139	127340440	30550279	24070134	281727797	302171330	48334524	529156795	1515213	176295253	1093226543	71068116	274928120	35543521	530176147	1544013	5073001	598161810	34929161	42174158	41675	8223205
#N/A	Indolelactate	Amino Acid	Tryptophan Metabolism	HMDB0000671	Meta_266	5.453	206.081	[M+H]+	Positive	69.26	30765271	4153550	2407454	11539488	52652293	1997875	1062066	8752009	1240365	1704874	9465233	5213349	1217021	13685357	10540206	21778933	10612032	3724230	4282274	1498588	3851678	6448747	16480811	2405572	4032793	2816648	3218499	30426252	4593640	25250664	942637	47676897	2086471	8457263	42354307	2653873	2467406	1003760	1032714
#N/A	Ketoisovaleric Acid	Amino Acid	Leucine, Isoleucine and Valine Metabolism	HMDB0000019	Meta_42	1.5	115.039	[M-H]-	Negative_NH4HCO3	16.54	6780343	2253308	7758912	20098963	14709523	1287441	3769907	9511071	9379634	4047499	11477195	12975609	1316927	8958258	5238090	12310636	15721567	741710	1353990	1281268	101090288	3506592	7218378	7130768	3118460	7623441	3824177	8038350	5620088	4849785	1236655	26478511	5391489	2355256	19860718	1386720	2626958	1964934	741828
#N/A	Kynurenate	Amino Acid	Tryptophan Metabolism	HMDB0000715	Meta_235	3.669	190.05	[M+H]+	Positive	9.52	4222582	1026001	0	5351135	8690383	1530067	44932	1828463	4197661	402734	2109298	98765	339726	6647789	1271963	560177	1342241	494184	3084503	984091	200680	1493533	1956366	1712243	3402934	4888123	1340372	4078508	1231249	4907012	361998	6141443	1184550	441168	3355304	1387427	515860	566703	0
#N/A	L-Acetylcarnitine	Lipid	Fatty Acid Metabolism (Acyl Carnitine)	HMDB0000201	Meta_260	1.273	204.123	[M+H]+	Positive	614769	309430	137945943	21047894	56893724	417715	215128248	55909616	143088980	4928975	194622260	65804058	125745944	40841471	19881249	4642837	3107087	30058219	6216561	101419512	154038571	49095675	37685401	20897346	184410352	0	25204059	158033589	116512	68308500	360457	25214245	59324	81612191	2171321	0	10832105	34295509	107280433	113745644
#N/A	L-Alanine	Amino Acid	Alanine, Aspartate and Glutamate Metabolism	HMDB0000161	Meta_15	1.214	90.0456	[M+H]+	Positive	27.93	80217922	113188952	34997002	94847806	79923778	42678157	100833121	272645261	315578864	37669193	121300211	69340314	30664774	130339539	34192635	203315318	216572333	26279726	78625244	46818386	50309764	8692583	58523100	74388606	13435753	43938762	54667745	7544015	108896161	31713247	34817455	25250093	157367330	77974661	64080017	70795614	22178480	140229073	45114877
#N/A	L-Allothreonine	Amino Acid	Other Amino Acid Metabolism	HMDB0004041	Meta_165	1.049	164.029	[M+H]+	Positive	10.53	195727	74947	54773	715417	686044	917947	0	354778	4538958	0	0	80974	44527	82543	0	0	0	774373	94358	598631	171886	0	77975	459689	0	3008517	60278	0	0	0	0	164710	1122348	82270	598250	163242	0	37885	0
#N/A	L-Arginine	Amino Acid	Urea cycle; Arginine and Proline Metabolism	HMDB0000517	Meta_196	1.131	175.107	[M+H]+	Positive	110.71	59574972	46599316	37885764	20256008	163916928	13927516	123684416	103674104	47521608	644796928	83686864	105432720	43671316	93079488	11508086	131911768	42132184	12763799	90294216	110130104	183405216	77992496	33424358	101098112	40952604	50544920	57907280	14424052	304236160	63478516	24709030	11799214	67373400	14472105	15423923	9448987	12502345	7943078	58238288
#N/A	L-Aspartic Acid	Amino Acid	Alanine, Aspartate and Glutamate Metabolism	HMDB0000191	Meta_93	1.184	132.029	[M-H]-	Negative_FA	35.06	15911871	3952845	4826363	6340635	16959948	28594322	15323780	11065185	25521544	17817198	3963645	14642413	4261316	18363230	1920680	27520169	19619119	3069963	4046207	10610091	8541551	5017059	16737218	15475492	7395584	35027687	8021722	4811052	19836650	3211316	2993009	2219660	41025205	6852711	2764997	2982317	9676152	6250236	5665578
#N/A	L-Glutamic Acid	Amino Acid	Alanine, Aspartate and Glutamate Metabolism	HMDB0000148	Meta_129	1.226	148.047	[M+H]+	Positive	218.52	20293964	29680008	19792190	17638750	23666382	15069620	140617600	42612732	129613904	14964960	283988448	117557928	12045177	19218362	7343858	45410788	166184800	11972382	23474784	15057615	315011136	31338232	24081232	20247080	203590464	114377464	19349278	12685830	64091220	26934208	12195167	7007878	114892136	25601486	13018791	6943221	783535232	873905536	34464020
#N/A	L-Glutamine	Amino Acid	Alanine, Aspartate and Glutamate Metabolism	HMDB0000641	Meta_127	1.094	147.071	[M+H]+	Positive	115.18	13287645	11426658	9002109	40941068	12441277	113786328	82832536	32234288	17117250	39769592	65443244	101351280	1377603	39326144	1158640	30775776	73037128	4769220	43265600	31123902	539831	16601670	55484024	51917612	69932632	26038216	22431154	724191	34633056	4499352	4188988	2249459	12644359	7156476	1300744	3144337	6886488	9137320	23464648
#N/A	L-Histidine	Amino Acid	Histidine Metabolism	HMDB0000177	Meta_145	1.086	156.077	[M+H]+	Positive	291.31	26043612	150676128	58776072	130146752	24651030	412344800	299347008	168747344	168839072	137147344	344209664	509605088	30320008	240887120	53197904	51505204	173862144	5639406	57863004	228503600	81814888	129475744	104851600	159547952	44971080	141112448	139217888	4364044	248969792	21344630	168612768	4472680	76370512	12840725	8236190	8290852	182880976	160225536	293441120
#N/A	L-Homoserine	Amino Acid	Other Amino Acid Metabolism	HMDB0000719	Meta_55	1.287	118.058	[M-H]-	Negative_NH4HCO3	30.51	940923	648433	24542	962382	1537903	171864	31648	1156929	1627828	126972	2224299	1118507	24077	1029617	1995338	2115411	2824855	408258	347551	48551	1685979	758810	1419450	942769	1513463	552681	110069	2289523	1096412	2100251	0	1747599	836518	211866	6158834	130031	345106	514352	79260
#N/A	L-Kynurenine	Amino Acid	Tryptophan Metabolism	HMDB0000684	Meta_268	2.085	209.092	[M+H]+	Positive	14.23	4680363	974358	323110	2088862	8534045	3370943	565650	2646018	10394945	250147	1226300	430741	149622	8509054	45110	2106717	3281238	703386	3924837	2273941	13386822	298507	1771486	3250753	434461	11037682	1516076	1670547	375321	3688472	91590	634427	1954145	231607	2134454	810025	159238	1124745	232616
#N/A	L-Lysine	Amino Acid	Lysine Metabolism	HMDB0000182	Meta_128	1.044	147.113	[M+H]+	Positive	489.28	156607744	238959504	82671328	86320952	222931504	458201312	279329920	278195264	291458112	162296336	152766128	348478560	200124176	1382941568	118462576	576937536	225434560	206375408	323289280	207380672	15853376	348666464	355516256	246283840	1153848832	281936928	538780928	103510768	583790400	281800064	160329664	256967136	61156856	658948480	115121808	120405016	48093128	27213700	533243872
#N/A	L-Methionine	Amino Acid	Methionine, Cysteine, SAM and Taurine Metabolism	HMDB0000696	Meta_134	1.453	150.063	[M+H]+	Positive	88.22	139383712	8421679	20912808	26788768	793563712	15765799	9435969	6628615	11150641	9652481	5674486	3128572	17733376	149014144	15983274	153997280	27921202	15155591	17664084	10249222	9105839	20457240	88597224	12129399	11328710	20839016	30660538	18552802	10598736	286183040	8854034	205605904	15257757	19894514	229896032	13808354	16545999	24653850	9577766
#N/A	L-Norvaline	Amino Acid	Other Amino Acid Metabolism	HMDB0013716	Meta_47	1.003	116.071	[M-H]-	Negative_NH4HCO3	1238.16	623678442	140169112	11259829	785163397	176007361	708917166	119773736	368334192	48554790	341236149	179534983	712052391	64841093	928150251	120171625	271839203	2872401383	105907179	815859194	198611542	3217689	1269493698	239957428	194977111	523074440	31341342	363029599	558696520	518346337	791356158	80974580	124868007	66486008	112633108	366004837	84237303	81255496	4661033	60570590
#N/A	L-Pipecolic Acid	Amino Acid	Lysine Metabolism	HMDB0000716	Meta_85	1.216	130.087	[M+H]+	Positive	124.02	379894752	184911216	64761644	52530208	4743112	301221120	6273756	282426464	212684576	220298736	323846016	3042193	196802528	1392555	341074848	496709664	170437088	189519040	249358352	224589728	362111456	272398592	457894976	199844400	881569216	4410947	401552064	277121632	421831424	542292864	143184240	438563264	6097926	379986944	164168864	121254688	6118591	2412710	275752608
#N/A	L-Proline	Amino Acid	Urea cycle; Arginine and Proline Metabolism	HMDB0000162	Meta_48	1.211	116.071	[M+H]+	Positive	1427.75	194025152	712771776	103405872	993155072	266940448	2024258432	1654703104	3009911296	283033248	1948967808	2089133824	5338405888	68158352	6242604032	74199832	309425024	3923108608	175948544	4353057280	608048256	2367211776	1418764416	1612443392	2801557504	8477101568	338358304	390250848	234054960	3418765312	201595216	281299136	61471636	5290432000	113663176	75833944	78937096	6453727744	1409780480	889313088
#N/A	L-Prolyl-L-isoleucine	Peptide	Dipeptide		Meta_303	1.347	229.154	[M+Li]+	Positive	28.23	14737787	16074456	733010	26260192	43830496	16202764	4710536	18738818	22966532	6067124	62415336	7525760	11085892	19536176	6872522	14426347	15508690	8323652	13345554	7694680	216087184	16366164	14489458	11865392	18404336	34002928	10159451	17741882	13760153	17857398	2380808	16469558	20003070	3810008	20125754	17688218	65294368	41972772	1637925
#N/A	L-Valine	Amino Acid	Leucine, Isoleucine and Valine Metabolism	HMDB0000883	Meta_57	1.22	118.086	[M+H]+	Positive	3513.49	19423783861	3246315098	866004192	14972022150	12173448252	12770936633	3713307855	12786628061	3827121548	6017067826	5338432295	11105159060	2472358019	28092666666	5903940357	10128350294	26956627259	4229686014	12688979130	4873539887	813504009	16647445700	10154706227	6436606352	17245004647	4302995271	7761856297	26512237418	11045162101	18853233359	2594188268	5346217070	5888375686	3483323574	10528041725	3951842813	4044495218	1407455576	2120631813
#N/A	LPC 18:1_sn1	Lipid	Glycerophospholipid (lysophosphatidylcholine)	HMDB0002815	Meta_483	7.333	522.355	[M+H]+	Positive	247326	1099856	45351	0	530512	7452158	272980	0	306499	0	0	0	150367	0	3099887	0	832863	202574	0	333794	0	8461127	391927	201220	136291	335763	0	0	960824	1053631	154285	0	0	0	0	0	41882	0	0	0
#N/A	LPC O-18:0	Unclassified	Unclassified		Meta_481	7.888	510.391	[M+H]+	Positive	18	1074656	150025	59476	547395	6999010	593401	36035	549962	64417	46114	137843	55910	53352	1330806	41133	559803	408757	103022	612518	45549	303731	520617	148288	378105	1062610	161371	158083	61366	457106	84434	93931	42062	81532	136048	101828	61820	176490	111212	277730
#N/A	LPE 16:1_sn1	Lipid	Glycerophospholipid (lysophosphatidylethanolamine)	HMDB0011504	Meta_474	7.118	452.277	[M+H]+	Positive	137770	606122	0	49232	279795	762522	101379	101584	143794	71058	0	46549	73590	51850	346115	0	0	0	102040	0	0	334554	0	47444	133143	107580	80845	47127	5527900	0	36370	80202	37341	278710	120467	55606	229431	119746	205512	0
#N/A	LPE 18:1_sn1	Lipid	Glycerophospholipid (lysophosphatidylethanolamine)	HMDB0011505	Meta_478	7.362	480.308	[M+H]+	Positive	261789	2931269	0	0	471883	5304502	76738	0	665701	303808	0	0	51459	0	1699960	0	583479	39052	0	218183	42203	1000525	300152	0	326394	1049285	0	0	3389124	1156317	312424	0	0	0	0	0	53116	0	0	0
#N/A	LPE P-16:0	Lipid	Glycerophospholipid (lysophosphatidylethanolamine)	HMDB0011152	Meta_472	7.578	438.299	[M+H]+	Positive	8.26	1907040	1190	273713	7503758	51640912	1783723	495324	1586918	603225	1005716	35498	436930	3159602	5839401	0	2145415	1786142	546023	720087	1569840	47448	610802	2591582	2462228	2265629	4040060	3306679	3209239	5061524	769530	1434118	337324	200911	3557822	374975	3450973	5100126	5280310	432589
#N/A	LPE P-18:0	Lipid	Glycerophospholipid (lysophosphatidylethanolamine)	HMDB0240598	Meta_477	7.834	466.328	[M+H]+	Positive	221888	3737627	109734	214960	1855711	44234961	1393759	69913	1820668	521706	59798	77995	511220	147919	9176654	44505	2160564	698076	115122	1576000	47628	244748	853803	397576	729982	3760682	338884	246507	1120904	5811370	989271	81795	82327	360862	57585	262727	681793	179425	497224	104364
#N/A	LPE P-18:1	Lipid	Glycerophospholipid (lysophosphatidylethanolamine)	HMDB0240599	Meta_476	7.415	464.314	[M+H]+	Positive	146988	723478	147847	48694	396629	12015994	191514	63137	52540	264628	101120	189203	303244	168672	2165899	82968	122149	46553	215120	439389	318307	258050	40907	67420	110340	567003	371581	0	928417	802544	62882	39248	109642	252209	114839	169852	291244	237640	223379	46120
#N/A	Lacosamide	Xenobiotics	Drug	HMDB0253940	Meta_339	6.451	249.134	[M-H]-	Negative_NH4HCO3	4.85	27199	0	0	0	0	0	0	0	0	0	26121	0	0	26968	26384	0	0	0	0	0	593669	0	0	0	0	0	0	0	0	0	0	0	0	0	0	0	0	0	0
#N/A	Lactoylphenylalanine	Peptide	Pseudodipeptides (N-Lactoyl-amino acids )	HMDB0062175	Meta_309	5.549	238.107	[M+H]+	Positive	8.46	757096	1344791	0	566907	1192058	472707	88413	273068	1494431	38083	15843169	141444	0	997618	120856	50376	926959	559002	777333	83980	25436942	167110	337949	303275	818533	1509009	260398	33444	670101	70915	0	182265	768363	73908	519452	297494	1793689	509217	0
#N/A	Lauryl Sulfate	Xenobiotics	Natural Product/Food/Plant		Meta_370	7.972	265.147	[M-H]-	Negative_NH4HCO3	3621.93	130299461	140260747	6599352	46119408	9212276143	82215640	31592953	97958488	129972889	37581463	3889600	9708943	44462501	176446590	7665148	11199898	21448756	21843525	72891720	8325676	7091686	85386102	6267041	35617613	680453302	59703216	36577276	383921164	20365956	6477298	4486346	69787328	5016797	45080804	35916997	12608096	7999897	3643045	9881725
#N/A	Malic Acid	Carbohydrate	Citrate cycle (TCA cycle)	HMDB0000156	Meta_97	0.875	133.013	[M-H]-	Negative_NH4HCO3	709.91	3735815	37200609	9183626	1830512	3261670	9337422	7170050	2449633	7430009	18810365	50205339	11497429	892085	5772012	2527537	2299266	15613896	173196	3530648	4895694	6529124979	5002128	6209944	8130531	2082885	13316315	3432597	2617870	81086549	2367075	2599413	446002	19564450	12582896	182232	5039315	7213018	51283592	6932824
#N/A	Malonylcarnitine	Lipid	Fatty Acid Metabolism (Acyl Carnitine)	HMDB0002095	Meta_335	1.337	248.113	[M+H]+	Positive	87.49	0	57412	0	62585	0	499696	132718	2042875	0	136930	69456823	22283000	695434	0	0	0	1060626	46417	0	60689	11384029	96544	0	66632	0	0	0	0	143910	0	0	0	21347402	0	234078	0	101773866	84907	0
#N/A	Mannose	Carbohydrate	Polysaccharides and Oligosaccharides	HMDB0000169	Meta_204	1.212	179.055	[M-H]-	Negative_FA	376.96	24308508	3282942	2777186	14345141	9570966	6617406	218505088	20353332	18864760	3422991	3615846912	6678862	10176757	8545868	4994539	5929234	17631350	4452036	4242352	8718642	2540689152	23172898	7448966	3664865	30182896	20862240	4908746	25951650	14088515	3731064	14330618	6202720	226352672	4816490	6777930	5336114	48858208	179319456	1437954
#N/A	Methylergonovine	Unclassified	Unclassified		Meta_454	5.647	340.205	[M+H]+	Positive	100146	940284	2027145	3400139	1801141	14102501	1718605	95457	632996	5931739	441178	346811	0	6410078	737626	1048670	89776	2845659	147053	764709	73284	0	746815	1789583	1676952	59087	11723055	3927550	22584831	4224324	65346	367322	371660	811022	4780800	37755	7066755	2963541	1841768	0
#N/A	Methylhistamine	Amino Acid	Histidine Metabolism	HMDB0000898	Meta_74	1.065	126.108	[M+H]+	Positive	24.39	1222258	1093378	0	75792	1847150	182554	370673	244375	761972	669025	484869	186037	121386	522332	2838156	1677562	878935	29259	270802	0	0	0	2300538	222226	5289077	886003	223219	1424935	346144	977038	56516	318325	0	42898	1519644	340391	78	393060	204039
#N/A	Methylimidazoleacetic acid	Amino Acid	Histidine Metabolism	HMDB0002820	Meta_111	1.237	141.066	[M+H]+	Positive	396.34	251970688	95168816	6899096	1060401600	998962496	90308008	155969152	151529168	50945348	33052530	202665168	357428352	25757052	354346560	160526912	260220784	281601312	130894488	139494144	86550672	40964984	290237248	207500464	74228024	486631136	59137000	242656960	181565232	310784064	284239776	14926504	269046976	171929072	114877072	299396864	250930016	111086880	26092042	13436499
#N/A	Methylsuccinic Acid	Amino Acid	Leucine, Isoleucine and Valine Metabolism	HMDB0001844	Meta_87	0.891	131.034	[M-H]-	Negative_NH4HCO3	131.52	46874934	1558618	393519	6362872	7315613	1497100	1293359	38498617	6392584	16727282	69430590	4324726	1910435	9415019	18266535	6500730	12511995	1349837	3771637	1609786	296660633	8487163	11163066	2565313	7370025	3606347	3518288	18446639	6282991	70043443	3931964	8602902	12925586	8730425	11109997	2219813	2145897	376562	445645
#N/A	Metoprolol acid	Xenobiotics	Drug	HMDB0254682	Meta_375	5.359	268.19	[M+H]+	Positive	602.7	0	0	0	101090	13347292	0	0	0	0	0	0	0	48545266	0	0	0	0	69974506	0	0	0	0	0	64712	0	0	0	0	0	0	0	0	652654	0	0	0	176531990	0	0
#N/A	Myristic Acid (C14:0)	Lipid	Long Chain Fatty Acid	HMDB0000806	Meta_298	8.184	227.201	[M-H]-	Negative_NH4HCO3	241.3	10716475	22051790	15858551	15559990	26872632	22967221	15089365	20581191	18483858	19523366	14744720	16498889	9295377	25050032	9482358	19092144	16996641	14167444	23250111	21966565	20149801	20982983	16654452	20026722	21503360	14516522	14814756	30731839	29664940	20274723	14419794	40269264	7543766	16068668	13218417	17286106	13288599	13223373	16989172
#N/A	N,N-Dimethyl-Proline-Proline Betaine	Amino Acid	Urea cycle; Arginine and Proline Metabolism		Meta_316	1.443	241.155	[M+H]+	Positive	25.79	10595171	9171864	316421	21178602	36525167	4662499	1804293	9113726	15565998	4038115	28914755	3184021	4141178	23352668	7276388	12931844	9262463	4558716	5037693	6485116	102400265	2453366	12213751	9110305	13876991	20993911	8240268	12949015	3634196	21470969	954876	11015044	13782296	2134107	13743624	5380389	9282530	6220478	747450
#N/A	N-Acetyl-D-Glucosamine	Carbohydrate	Amino sugar and Nucleotide sugar Metabolism	HMDB0000215	Meta_290	1.263	222.097	[M+H]+	Positive	7.63	2454255	175132	0	73428	143400	159078	295126	1194844	77512	911598	1436256	196630	0	0	0	103740	0	60455	0	0	1566829	69968	100982	0	0	168901	391610	77898	126324	0	0	45189	148543	191484	4157629	0	293835	96228	47975
#N/A	N-Acetyl-D-Mannosamine	Carbohydrate	Amino sugar and Nucleotide sugar Metabolism	HMDB0001129	Meta_324	1.201	244.079	[M+Na]+	Positive	127327	26395300	546369	702517	24025247	20698190	5681460	798033	17231511	1922493	17894637	4006778	117411	1132562	1030733	1935251	1370036	1426234	2575791	612802	874506	90541077	3140502	2312028	153360	0	2535346	2958512	14159650	10053280	3136028	215095	5249029	17128942	1434036	42431231	4530210	3553830	8006726	988181
#N/A	N-Acetyl-L-Aspartic Acid	Amino Acid	Alanine, Aspartate and Glutamate Metabolism	HMDB0000812	Meta_191	1.3	174.041	[M-H]-	Negative_FA	158.41	3242476	25258874	1555523	10236390	2131645	40671600	8243476	72092480	9437399	15187278	19022458	75136040	5567830	11504708	1195569	1436236	67512176	1475641	16844806	15764602	17283226	8031594	4546944	17502854	1524462	14111611	8824464	1258569	43129684	1208336	3116705	1110819	86426632	4294502	2238698	573637	352654880	25261068	10763677
#N/A	N-Acetyl-L-Tyrosine	Amino Acid	Tyrosine Metabolism	HMDB0000866	Meta_289	3.394	222.077	[M-H]-	Negative_FA	39.38	4490486	1897195	47070	5441106	32663080	2427748	1063075	1436684	2934549	248218	3735999	3460132	1544961	27094432	3881671	4116329	3157845	3277247	1642886	902070	0	2966053	6873993	1131919	6145020	5133197	2364623	3307431	1632645	2247814	240138	2721296	1585707	3037472	5599072	2357757	1479654	687396	151883
#N/A	N-Acetylcadaverine	Amino Acid	Lysine Metabolism	HMDB0002284	Meta_118	1.283	145.133	[M+H]+	Positive	731.1	801745108	428675187	28394758	157814675	432242402	320218894	52961641	200224889	62558467	51968444	99630396	246956757	460061556	1584176413	64435539	334983209	147750500	387861657	132897658	171303666	99182270	501095387	172207526	122203480	220575704	100345298	109120013	1070296170	821935982	246905477	26076377	696847724	110897771	633537902	595709683	281749571	22904821	54386965	173043685
#N/A	N-Acetylcitrulline	Amino Acid	Urea cycle; Arginine and Proline Metabolism	HMDB0000856	Meta_281	0.995	218.113	[M+H]+	Positive	6737.35	829711	0	126112	147137	174728	1405009	1903488	15064950	125812	3326391	1206439	12972929	1286816	25877841	123060	105716	22549661	887193	8452634	5536395	272802	7134599	1575190	3309902	36143111	4748053	4996669	122545	7999533	66633	836796	73396	3046970	1424910	115429	1849068	141236	478403	3031552
#N/A	N-Acetylglucosamine	Carbohydrate	Amino sugar and Nucleotide sugar Metabolism	HMDB0000215	Meta_348	1.188	256.059	[M+Cl]-	Negative_FA	749506	269740573	3825236	1548512	194922797	99562455	76895255	10097127	114826536	4267541	99887176	3957647	21033917	6813575	18406015	7861657	17667485	71122324	6314690	11725010	9612072	24058015	28977547	25367881	8398816	21382595	9546841	25045169	37133006	33957721	18685540	754487	11333414	29608889	9154751	143376339	7311528	19260052	3540148	7400193
#N/A	N-Acetylglucosamine 1-phosphate	Carbohydrate	Amino sugar and Nucleotide sugar Metabolism	HMDB0001367	Meta_421	1.175	300.039	[M-H]-	Negative_FA	117306	19440459	4494107	2708922	8397222	32407461	6224930	2137101	16959020	36048466	3637884	870346	2905182	2270462	12008709	662912	19372919	5637363	1901453	6055665	2189044	346585	5854271	10472426	2825465	4260694	39484261	6358648	3728284	9631779	9245277	639626	1211589	12847985	4529803	17994867	2146186	1385148	1490342	1852544
#N/A	N-Acetylglutamate	Amino Acid	Alanine, Aspartate and Glutamate Metabolism	HMDB0001138	Meta_227	1.444	188.056	[M-H]-	Negative_FA	68.81	10864209	5432466	617963	8330330	7013836	7698122	2221850	9893119	10629801	1416109	11023401	9942937	3568717	32499120	1432774	4057235	9136641	8330879	5163251	4414788	7667177	4706286	5489553	4419413	8999564	15472282	4674949	898491	7314935	5097639	899429	5935376	17831950	3402747	3860215	5112461	22639692	28659394	2318425
#N/A	N-Acetylhistamine	Amino Acid	Histidine Metabolism	HMDB0013253	Meta_143	1.232	154.097	[M+H]+	Positive	63.28	488250	5161124	129480	1573893	12604454	231223	7000939	167345	5781086	0	25681205	2837429	1414849	166108	50232898	351862	3312464	3665877	642088	1657898	711021	916829	25831533	166123	51969227	465188	2519001	1580981	285393	1908339	635232	5771808	4297616	252580	11799262	995795	47591	9092512	79667
#N/A	N-Acetylhistidine	Amino Acid	Histidine Metabolism	HMDB0032055	Meta_245	1.157	196.072	[M-H]-	Negative_FA	16.76	533236	335502	26979	457218	535393	0	278335	327787	2564514	0	174078	641446	81701	540189	23566	352122	770791	413618	53849	0	251	224616	329659	0	699176	4790824	219718	1085182	408429	374692	0	102340	437725	274361	491455	105579	978309	0	49366
#N/A	N-Acetylphenylalanine	Amino Acid	Phenylalanine Metabolism	HMDB0000512	Meta_267	5.394	206.082	[M-H]-	Negative_FA	496.22	32015794	11342978	932430	13236835	369915328	10745758	7020772	5751686	34246948	1744570	39237732	10026103	5092561	272132928	63206356	38437080	8374228	15325792	8324694	6001142	116368128	21445254	69180656	6294045	41908636	46049340	12599353	15444398	9981942	19110412	893267	10433482	4319853	16547468	21476912	15048029	4803938	1254446	715853
#N/A	N-Acetylputrescine	Amino Acid	Polyamine Metabolism	HMDB0002064	Meta_92	1.207	131.118	[M+H]+	Positive	178.57	278311712	84072768	17173156	185881520	244797888	127112368	68004800	131175224	36764420	43969272	62222500	117943600	43062168	1001621760	146942000	158416848	170493472	111672040	146557744	69092400	13345561	225514000	171387040	74791744	336478656	43109112	103494112	310388416	240976080	162360512	20316742	260568512	31693542	133068120	161286448	67181968	15321588	16544934	47516364
#N/A	N-Acetyltaurine	Amino Acid	Methionine, Cysteine, SAM and Taurine Metabolism	HMDB0240253	Meta_168	1.001	166.017	[M-H]-	Negative_NH4HCO3	88.4	1270374	2241274	124843	946065	1368019	2959378	17666364	980176	5815673	9857692	1442663	5993483	13138175	1888898	3289049	2659457	2896676	957709	13514702	10084559	60998	1869193	5385101	10829534	5807051	4654328	10931577	271694	1754798	1880249	2747449	1424304	446720	4676614	730960	3736990	901411	38084	4614546
#N/A	N-Acetyltryptophan	Amino Acid	Tryptophan Metabolism	HMDB0013713	Meta_327	5.484	245.093	[M-H]-	Negative_FA	15025.2	6818194	399212	47983	6044998	6223337	717663	145317	1476070	877871	117943	2946354	926010	645972	6378574	1752078	1534815	1751973	1016074	1137463	518448	3517478	5167250	2441721	619180	5822118	1297122	2911797	4697826	1136679	3750726	319783	1863992	20099	437050	4640132	611353	637018	0	0
#N/A	N-Dodecanoyl-N-methylglycine	Unclassified	Unclassified		Meta_381	6.864	270.207	[M-H]-	Negative_FA	589311	2815283	1467840	605821	7719937	3122001	1539415	2311589	1761751	8244704	854562	16772415	3208986	1285974	3202130	1617353	1404936	1586926	26880366	1962379	1653824	34018930	1426091	2674551	5195792	1589887	6954242	1622638	1643108	1043133	2043316	8888227	16353797	833299	1861198	4058343	2070761	1073490	834175	336336
#N/A	N-Fructosyl pyroglutamate	Xenobiotics	Natural Product/Food/Plant		Meta_405	1.255	290.088	[M-H]-	Negative_FA	621972	2052862	286228	0	14493454	3571640	3562732	45577341	1675965	16476770	8845793	19636909	27025426	6221253	587686	2091482	66804	602568	485551	24726	29071003	65355038	4259826	3419688	42781108	89237	22192922	34739	0	1584250	0	4139745	0	2447514	0	860175	142718	3739496	3159690	88818
#N/A	N-Phenylacetylphenylalanine	Peptide	Acetylated Peptides	HMDB0002372	Meta_396	5.741	284.128	[M+H]+	Positive	75185.9	0	0	0	666256	259394	0	54873	0	0	0	95228	0	0	37127	0	90663	0	0	0	0	137526	38659	40323	0	10414698	0	39045	603022	0	51704	0	0	0	0	0	46247	560172	68568	0
#N/A	N1-Acetylspermine	Amino Acid	Polyamine Metabolism	HMDB0001186	Meta_329	1.044	245.233	[M+H]+	Positive	484732	63410	155125	0	5198566	456936	750593	2810476	1635428	7212519	952434	6439536	7818917	0	7270239	2351589	204810	11981115	0	858400	0	0	552307	3552745	218451	10130208	13398440	117566	103831	833321	150259	0	0	2747041	0	5131162	0	17382765	2413522	0
#N/A	N1-Methylguanosine	Nucleotide	Purine Metabolism, Guanine containing	HMDB0001563	Meta_416	1.552	296.1	[M-H]-	Negative_FA	209179	219309	0	0	349928	452445	1889	0	27062	2134308	28105	232519	19422	202732	39852	0	92571	0	0	0	0	0	0	0	0	0	3710248	0	53230	138229	0	0	0	757210	0	0	0	347425	4243720	0
#N/A	N1/N8-Acetylspermidine	Amino Acid	Polyamine Metabolism	HMDB0001276	Meta_228	1.117	188.176	[M+H]+	Positive	5722.42	5262128	13059544	640923	17657064	31846770	7213934	8255076	6206726	59292676	4263392	29130662	28499226	171714	23360350	34300712	12061913	21043302	1520576	364932	3364484	4191662	515801	32982104	2022234	57838576	76915080	5851850	41333172	10032999	0	534921	1246364	23307344	281250	4661186	239125	82267816	43417076	0
#N/A	N6,N6,N6-Trimethyllysine	Amino Acid	Lysine Metabolism	HMDB0001325	Meta_234	1.089	189.16	[M+H]+	Positive	67267.7	26284712	4576363	633364	6282827	43630322	6804264	2513295	6866987	5404046	2650729	4842077	2014349	7086834	36281705	8681029	30937084	7174230	2046597	6631166	4874366	1037712	6951951	17266584	4677697	23351009	5430530	10740837	26422019	8867757	31657543	2665482	20816815	4106236	4323685	17936005	8481684	1174078	125905	2665577
#N/A	N6,N6-Dimethyllysine	Amino Acid	Lysine Metabolism	HMDB0013287	Meta_198	1.104	175.144	[M+H]+	Positive	40.35	25362682	3059798	606479	1749486	51267084	732579	782802	3623441	8622925	372067	3398277	799104	4045672	33910408	4763944	30804484	5883710	717592	3368714	2351687	0	4568799	10450872	2182974	16569246	7167694	6027236	12676601	3829992	47769124	891385	20822038	1931241	3087119	12506746	2557990	288264	1147625	1830312
#N/A	N6-Acetyllysine	Amino Acid	Lysine Metabolism	HMDB0000206	Meta_232	1.285	189.123	[M+H]+	Positive	2203.17	56364546	25252035	2368567	12451884	70793468	9192304	6693133	9519864	52955845	9569950	10289600	5968544	9250225	19892228	6857772	50197650	28078150	8106886	8975694	5509428	2214973	13473274	10779131	7193066	33228690	60360072	12975349	12231817	18335253	37658513	2368822	40085772	35956530	17818611	32624216	12864223	6972381	14318808	5093099
#N/A	N6-Methyllysine	Amino Acid	Lysine Metabolism	HMDB0002038	Meta_157	1.066	161.128	[M+H]+	Positive	24.83	4290911	7133579	312659	492392	8487290	1831652	396252	1273751	5463906	397806	811537	1069038	2919323	9277046	919110	5598346	3173102	899484	1086169	1078365	0	1493075	3806270	744980	4982391	7298584	3194460	2819856	2270658	5592440	354448	3634452	1324075	1959255	2145791	1094606	562293	232119	336103
#N/A	N6-Succinyladenosine	Nucleotide	Purine Metabolism, Adenine containing	HMDB0000912	Meta_467	2.208	384.115	[M+H]+	Positive	231247	0	0	0	0	0	0	141006	0	5126728	0	0	0	0	0	0	0	0	0	152151	57979	192182	0	0	0	105898	4714231	172316	0	107569	0	0	0	1526716	0	0	0	902700	597182	0
#N/A	Nicotinamide	Cofactors and Vitamins	Nicotinate and Nicotinamide Metabolism	HMDB0001406	Meta_70	1.256	123.055	[M+H]+	Positive	67.03	72975736	28082748	5112537	295537312	280884192	26861612	45929136	42549732	15792855	11118553	58582288	99396568	10510350	93115480	47835052	73102016	82945824	39496872	40383708	26109728	19102182	78274496	63152160	21828266	134946528	21809082	67666696	44351284	85920088	81782120	7477702	72944208	169290752	34935868	89601688	71994400	32969722	16584587	4694577
#N/A	Nicotinic Acid	Cofactors and Vitamins	Nicotinate and Nicotinamide Metabolism	HMDB0001488	Meta_72	1.315	124.047	[M+H]+	Positive	52.18	20827516	20902996	11886629	38311240	12652088	24288330	29377242	27128402	349523744	19745568	33992676	28788066	11925975	752472384	7884333	43709084	23951160	21279356	23121704	15209172	123590072	18886424	40485340	19168214	25486270	401922592	20344142	4984020	24512176	17310758	13319025	10261373	66278880	11002222	9037683	16082916	37188992	6060726	7191364
#N/A	Nitrazepam	Unclassified	Unclassified		Meta_392	1.269	282.085	[M+H]+	Positive	329241	0	1422359	0	9714859	0	9797492	9903376	4232166	0	1868223	10503603	16824537	0	4143776	0	0	18846659	0	7517779	5582785	5134524	6447629	3274003	5795804	2390518	0	1745894	0	2541527	0	0	0	2849299	66503	0	0	79096058	3876406	1503160
#N/A	OMEGA-HYDROXYDODECANOIC ACID	Lipid	Fatty Acid, Monohydroxy	HMDB0002059	Meta_279	6.609	215.165	[M-H]-	Negative_FA	294324	1353417	3855876	151485	2357414	7537022	3002854	11135709	2538952	7487691	1152208	14765738	1821333	1073805	9082071	509088	2780286	2822741	1144766	2085455	1398288	27676762	4035208	3466940	512020	3016518	5625059	2308332	17902908	4474072	7790553	1042876	22759178	1452875	776973	1682152	1495465	950586	2627497	464919
#N/A	Octadecanedioate (C18-DC)	Lipid	Fatty Acid, Dicarboxylate	HMDB0000782	Meta_438	6.688	313.239	[M-H]-	Negative_FA	1873867	51886475	34234546	2021225	11109243	6892524	7560117	3960328	20302655	115411294	9216260	32578564	49968550	10831249	10092740	4740363	32810599	59033680	87315501	14407289	11594917	18912186	60766172	23604202	7741839	29388422	104171905	24400702	17177666	14037268	53331058	8613221	129707437	11395554	3341037	21407352	12691558	73191954	17834423	2984805
#N/A	Octenoylcarnitine	Lipid	Fatty Acid Metabolism (Acyl Carnitine)		Meta_401	5.899	286.201	[M+H]+	Positive	117466	42522	3999750	0	1757613	37318	1949379	226935	889894	37010	1726606	1093959	1533547	51724	2427938	0	0	2985425	522455	1373121	1410887	532406	1433789	530478	4624722	0	51753	985262	52307	1579292	36580	37810	0	423490	0	0	0	222753	358967	288358
#N/A	Oleic Acid (C18:1)	Lipid	Long Chain Fatty Acid	HMDB0000207	Meta_391	8.681	281.248	[M-H]-	Negative_NH4HCO3	201.31	29715112	8571724	6980456	16122019	67436396	13748348	13750838	9092413	10773939	13972256	5867094	18039110	15537949	134360858	7699587	29559497	9191574	14319576	36258481	16578933	26710280	9944856	15046055	16637962	13778222	15110709	13007581	68511139	51299039	11750951	7662221	51408422	13702529	11305662	5520005	7236039	7080988	12633135	13253582
#N/A	Oleoyl ethanolamide	Lipid	Endocannabinoid (N-acylethanolamine)	HMDB0002088	Meta_448	7.413	326.305	[M+H]+	Positive	81246.2	493102	0	0	62894	4038964	0	0	35804	0	0	39332	0	0	1321618	0	198007	0	0	53130	0	391042	45128	0	0	806015	0	0	807131	90839	101965	0	0	0	0	0	0	0	0	0
#N/A	Oxoglutaric Acid	Carbohydrate	Citrate cycle (TCA cycle)	HMDB0000208	Meta_116	0.882	145.013	[M-H]-	Negative_NH4HCO3	82.03	45256	1709427	9176861	1936490	290993	214517	20222688	4125858	1742477	1869998	5899115	11816760	201104	53395	133174	170921	13190220	680242	692690	3372122	22349471	80996	1556312	777003	145472	4459237	980044	93105	5900388	24373	3652628	197663	1353138	1696331	31855	54805	75078402	85041887	10965199
#N/A	P-Cresol Glucuronide	Amino Acid	Tyrosine Metabolism	HMDB0011686	Meta_393	4.786	283.083	[M-H]-	Negative_NH4HCO3	14.24	0	0	0	24093	0	0	0	0	0	0	74708	0	0	0	0	0	0	0	0	0	5019339	0	0	0	22806	0	0	0	0	0	0	0	0	0	0	0	25665	0	0
#N/A	P-Cresol Sulfate	Xenobiotics	Benzoate Metabolism	HMDB0011635	Meta_222	5.022	187.006	[M-H]-	Negative_NH4HCO3	67.31	1517961	5645904	719003	2591828	575810	8905194	567812	14786336	18183373	1145031	1600896	971300	554273	6870547	225801	2824232	7956951	281592	1137730	50554	1277959	7242554	1169011	1171991	5425597	8280887	1954115	0	2942374	2220787	1048586	1011580	922115	0	779210	1977230	21503	678283	1898622
#N/A	PC 32:0|PC 16:0_16:0	Lipid	Glycerophospholipid (phosphatidylcholine)	HMDB0000564	Meta_490	10.473	734.569	[M+H]+	Positive	249714	4190689	513111	0	24612123	15156814	2862827	0	1524190	1149188	85121	0	378078	181716	7941087	61355	6724824	1335302	0	1530634	249866	2823127	2510687	931908	1763372	3943276	464144	0	7980444	4038356	2078009	0	239620	0	0	0	0	0	0	0
#N/A	PC 34:2|PC 16:1_18:1	Lipid	Glycerophospholipid (phosphatidylcholine)	HMDB0008005	Meta_491	9.792	758.569	[M+H]+	Positive	550212	12514200	2286862	0	6652649	11010224	5890904	0	4102949	515102	519340	208056	2848230	173317	23453473	294568	7317935	1909071	0	3330751	857465	59337812	10303870	1061674	2767917	1884289	0	300264	2793409	6889926	2298036	0	407458	0	0	0	538818	0	0	0
#N/A	PC 36:2|PC 18:0_18:2	Lipid	Glycerophospholipid (phosphatidylcholine)	HMDB0008039	Meta_495	10.611	786.597	[M+H]+	Positive	209550	9174368	1142116	0	3319188	12739384	4603530	0	2367752	502975	330088	82986	1399179	0	26583314	77302	6967018	1257061	0	2040585	284206	9141670	6068066	360662	1930632	1153434	0	0	3153272	6068334	1764768	0	169035	0	0	0	75220	0	0	0
#N/A	PC 36:3|PC 16:0_20:3	Lipid	Glycerophospholipid (phosphatidylcholine)	HMDB0007981	Meta_494	9.824	784.585	[M+H]+	Positive	70600.3	3296220	98938	0	955817	3191443	1275199	0	777142	45263	0	0	468080	0	7304261	0	2378943	105057	0	673046	59269	21178142	2410096	0	690274	145033	0	0	371081	2184354	247462	0	0	0	0	0	0	0	0	0
#N/A	PC 36:4|PC 16:0_20:4	Lipid	Glycerophospholipid (phosphatidylcholine)	HMDB0007982	Meta_493	9.61	782.568	[M+H]+	Positive	237485	6860985	190087	0	2872667	12260010	3222019	0	3234963	0	44467	0	737170	0	24237360	0	5903859	97852	0	1985774	69528	1678231	6361639	152337	1535103	644832	0	0	1745751	3459027	250013	0	44783	0	0	0	0	0	0	0
#N/A	PE 34:2|PE 16:0_18:2	Lipid	Glycerophospholipid (phosphatidylethanolamine)	HMDB0008928	Meta_489	9.857	716.521	[M+H]+	Positive	10.51	566176	0	0	1414781	1305688	117578	0	252393	0	0	0	222180	56705	1182842	63292	612557	185423	0	267051	59524	3040211	337900	205763	177106	401749	0	85083	566448	387693	200039	48384	53972	0	60977	0	55084	0	61165	0
#N/A	PIPECOLIC ACID	Unclassified	Unclassified		Meta_76	1.306	128.07	[M-H]-	Positive	105.95	3821838	9343412	1202153	5454448	5192131	4385484	47756530	5204351	6376356	4443142	554050292	16285502	4407159	69554042	3397035	3493763	14092313	7696378	6652827	6391721	2693171059	4555519	2506642	11300117	27076489	6621299	9256849	3846341	1418053	6241182	2979170	21089250	10031959	16025352	6331114	5413408	10148943	9768303	3303855
#N/A	Palmitic Acid (C16:0)	Lipid	Long Chain Fatty Acid	HMDB0000220	Meta_347	8.57	255.232	[M-H]-	Negative_NH4HCO3	3039.61	172775792	264852697	235274612	298052262	226945527	154975145	226051283	309642129	230913303	240252202	216853867	271561491	244393389	268115093	235023341	399392577	282574989	226185172	353845315	130515123	335543690	357020167	128965192	312533630	400264222	230198447	116060631	547914748	485841187	323477704	219031902	296713705	223292173	107747061	211297866	226792275	219385628	213422007	242976286
#N/A	Palmitoleic Acid (C16:1)	Lipid	Long Chain Fatty Acid	HMDB0003229	Meta_344	8.276	253.217	[M-H]-	Negative_NH4HCO3	64.58	2345412	1210985	523225	642146	10233505	1881847	431155	1233435	20145384	873868	1403690	619050	467110	30095235	599643	1035237	649860	373616	2930090	1382226	1973237	1975907	658576	1242768	3078226	1507486	387148	4692663	5762710	1305576	496363	10277693	822067	497014	698301	820969	239702	239403	393170
#N/A	Palmitoylcarnitine	Lipid	Fatty Acid Metabolism (Acyl Carnitine)	HMDB0000222	Meta_469	7.607	400.343	[M+H]+	Positive	325386	218582	0	0	0	5810133	0	0	0	0	0	0	0	0	178536	0	107473	48086	0	415866	0	230846	0	0	66876	498772	0	0	0	182645	44800	0	0	0	0	0	0	0	0	0
#N/A	Pentadecanoic Acid (C15:0)	Lipid	Long Chain Fatty Acid	HMDB0000826	Meta_317	8.364	241.217	[M-H]-	Negative_NH4HCO3	56.41	5065416	2550522	2427208	3465881	6118982	4893447	3724412	4429990	1880263	3840969	3585664	3792227	3711053	7475556	2014563	3311423	3828565	3336818	5382016	5820746	5141653	4741869	3580512	4153406	5001930	2315084	3680375	9727036	7736496	4401415	3227777	6770365	3513344	2111054	2286398	3595586	1951789	2161227	2382258
#N/A	Perfluorobutyric Acid	Xenobiotics	Chemical	HMDB0253102	Meta_272	5.316	212.978	[M-H]-	Negative_NH4HCO3	342.34	30513	185047	18729	23423	35040	144859	99577	141627	67173	375632	51516	231757	59625	26905	87332	23817	112018	21059	37072	28043	21100	49821	180282	39772	83347	0	123049	47805	124764	42207	22224	30008	88094	20924	23149	20392	26134	74423	124121
#N/A	Phe-Trp	Peptide	Dipeptide	HMDB0029006	Meta_457	5.544	352.165	[M+H]+	Positive	42860.5	548922	40086	78023	2870462	5405277	1056200	481861	612917	104305	1964154	815253	81879	0	3986936	649844	5036023	10106862	0	295872	33033	94384	2536556	2493158	168002	3721946	2116706	2538410	1806676	44982	50926	0	105006	1039060	49698	50629	139010	102388	326635	0
#N/A	Phenol Sulfate	Amino Acid	Tyrosine Metabolism	HMDB0060015	Meta_187	3.389	172.991	[M-H]-	Negative_FA	301.5	18519940	60828192	5483446	414337056	120589112	105560968	5385566	269042784	18439602	28469714	20457836	21038224	15546200	368385920	17392816	39790832	96488136	13689743	163129536	45814012	4111742	58791552	44528504	315126432	81141144	37282712	9413857	44537032	49487484	55470764	7212170	12018706	21667500	8548193	13691532	28002490	2533110	7317622	126670200
#N/A	Phenylacetic Acid	Amino Acid	Phenylalanine Metabolism	HMDB0000209	Meta_102	3.297	135.044	[M-H]-	Negative_FA	20.71	8567301	5752398	1298104	12875092	12022365	5317346	1455742	5127912	1194904	2064172	8626739	8920680	2075980	18165810	2816212	7537617	6570136	7674862	5001754	2824700	646562	4810536	9401195	3913308	7368470	3881549	3250814	4577238	3301604	3834505	1452840	3307442	7191210	8383362	2996901	3212909	10693877	6440356	1766479
#N/A	Phenylephrine	Xenobiotics	Natural Product/Food/Plant	HMDB0002182	Meta_176	1.18	168.102	[M+H]+	Positive	85.63	355788	72736	0	26163438	1470082	60826	264055	519427	1944034	0	3551918	0	617704	249320	77557	180197	269154	218160	123855	61833	18688867	0	325857	421285	0	1458475	671548	10493302	50845943	0	66396	1540862	319669	524605	1140105	1975882	258003	104108	59236
#N/A	Phenyllactic Acid	Amino Acid	Phenylalanine Metabolism	HMDB0000779	Meta_166	5.345	165.055	[M-H]-	Negative_FA	708.63	493076320	182239936	50410484	528263040	1057663104	177195488	97499616	463888096	67613168	83458560	585515008	495327584	64053936	818032128	336938080	713586752	535974720	207326048	281185376	81620832	528893888	344552640	632195392	178629840	598234752	144460224	90837704	721634048	159840864	575769152	41254744	414358240	211847168	120938312	535362048	116957152	345327200	254988064	53189768
#N/A	Phosphate	Energy	Oxidative Phosphorylation	HMDB0001429	Meta_19	0.886	96.9682	[M-H]-	Negative_NH4HCO3	12040.5	4983811939	4887108694	1169171125	5587035798	4217909637	5345499818	3651318741	4047288875	2458916657	5195069723	2186428997	5620701365	3505445323	7454247727	5077464630	3683408118	6740667957	1104210398	5723337215	4501500851	2748757851	6053970561	4414049366	6039625855	8366709260	1898364963	4745794862	6027672260	4813159738	6518259487	3247816403	3169968828	1784877689	2813755692	3414794572	1921395586	2316136653	1163892665	2651415592
#N/A	Phosphoenolpyruvate	Carbohydrate	Glycolysis, Gluconeogenesis, and Pyruvate Metabolism	HMDB0000263	Meta_172	0.908	166.982	[M-H]-	Negative_NH4HCO3	9.26	159450	112240	118927	718415	41044	49669	400644	872258	1963593	65603	57694	768347	518309	3104349	473357	1343870	189228	0	26689	102677	0	250996	598238	1514280	112828	1069475	100786	42762	51150	46772	34454	38569	259773	30720	566541	22498	49843	186441	33236
#N/A	Phosphoethanolamine	Lipid	Glycerolipid and Phospholipid Metabolism	HMDB0000224	Meta_109	0.917	140.009	[M-H]-	Negative_NH4HCO3	72.92	0	194564	23048	0	0	1239656	2090764	0	43433	705069	0	16861	110537	21830	34721	0	0	0	59165	91184	0	16834	46061	94756	23390	0	70465	0	105242	42574	1541381	0	5275481	22148	0	0	2453008	3077743	77884
#N/A	Phosphoserine	Amino Acid	Glycine, Serine and Threonine Metabolism	HMDB0000272	Meta_215	0.917	184.001	[M-H]-	Negative_NH4HCO3	39.37	142919	4728391	24130	297271	362302	61529	801417	1582374	2590173	104603	239388	488927	20868	308588	1900366	44785	2510683	16867	573131	147611	154508	83418	262399	1394384	1378694	577760	161620	95357	1719875	3571370	0	34367	100803	151583	43535	502301	2530643	1422196	125468
#N/A	Phosphotyrosine	Amino Acid	Tyrosine Metabolism	HMDB0006049	Meta_355	1.063	260.023	[M-H]-	Negative_NH4HCO3	9875.77	1219684	1322021	165019	370032	271066	984735	123179	274659	306026	203000	641293	458218	159565	683860	37133	871594	564059	431435	1515085	285632	98101	700670	110507	884771	3156116	134167	24232	91030	911088	592986	76367	250916	343885	531972	41066	1319684	54297	2803204	36270
#N/A	Piperidine	Xenobiotics	Natural Product/Food/Plant	HMDB0034301	Meta_9	1.453	86.0969	[M+H]+	Positive	3546.4	2618000640	325484736	208575568	1218869504	4914664960	697660800	524281088	1637322752	1785277312	535882080	499223	916076032	114694328	9130006528	734431808	3528780032	2443091712	287212512	1134071552	143911600	155576752	1176882816	2451300864	857601728	1648769536	2048027264	530042592	3922745856	987881024	2560430080	126800248	1743917568	1370276352	549600576	1531466624	447895680	157062256	313644480	131940312
#N/A	Piperine	Xenobiotics	Natural Product/Food/Plant	HMDB0029377	Meta_400	6.484	286.144	[M+H]+	Positive	229250	214265	1972375	203759	0	247577	13910679	69391	41191	9916143	42932	80827	42276	4156878	1496010	0	39547	5279068	0	185726	298756	571646	10303234	202046	0	0	8290468	0	1027624	39731	1170503	0	0	654613	36192	564956	315681	7338106	40661	0
#N/A	Prolylproline	Unclassified	Unclassified		Meta_273	1.466	213.123	[M+H]+	Positive	891.53	14030594	77150824	3304552	372978464	6556405	532546208	373170944	723152576	23153924	138260992	341972160	1730325504	9699432	1907945216	11538386	12800386	1564761728	4077710	944304768	321982528	144498976	398661984	325573120	667481344	1930283392	28197186	53131096	79959808	475276256	14144523	19650826	2733321	166379280	29822710	4672096	3547528	94484472	97249824	94708512
#N/A	Propionylcarnitine	Lipid	Fatty Acid Metabolism (Acyl Carnitine)	HMDB0000824	Meta_282	1.585	218.138	[M+H]+	Positive	52653	168610	12503168	326649	9581593	300302	16308306	5894590	16455381	864133	12920157	7627258	12065847	3458222	1054496	1803093	373323	3995678	2530522	9412346	16094280	9011357	4693572	3935780	14486553	0	2137212	13920444	12192813	9678355	177537	1973274	0	7905718	0	0	1357750	5278534	13674992	5562945
#N/A	Pseudouridine	Nucleotide	Pyrimidine Metabolism, Uracil containing	HMDB0000767	Meta_320	0.902	243.075	[M-H]-	Negative_NH4HCO3	38.97	99204	1428658	0	131781	155757	3574051	268074	1848046	45114	2014512	568032	1488093	351585	6430958	93016	801050	4653634	0	2834229	930339	200053	2971555	1043176	1462250	1800111	38535	1827056	0	2305789	58309	29334	0	2251316	0	25192	42209	42034	36752	636457
#N/A	Putrescine	Amino Acid	Polyamine Metabolism	HMDB0001414	Meta_14	1.037	89.1079	[M+H]+	Positive	360.61	705017437	116095002	31069331	718954035	279675001	191843900	255584951	463901381	140832218	152948594	303403767	594124057	1831942	1404747602	409416974	414737053	1201342926	236684297	570803725	56092140	45345413	605897892	502808952	255038772	1592764897	202561120	280631762	396879262	343280197	530170415	86048998	14947274	241628353	3349373	407965654	117906653	237340277	108238501	124926951
#N/A	Pyridoxal	Cofactors and Vitamins	Vitamin B6 Metabolism	HMDB0001545	Meta_175	1.379	168.073	[M+H]+	Positive	38.24	7300904	3485383	6810201	6781045	39627498	5597505	264108	7593044	953016	3582762	178399215	3060099	2852807	11384250	3573206	2990778	2742625	6690644	5813264	6625980	399992887	4294627	6978334	6003460	243110	6486662	6481918	10279441	129178	133977	5237501	2615958	7429270	9872500	2794923	11954332	2690528	11473931	197306
#N/A	Pyridoxal 5'-Phosphate	Cofactors and Vitamins	Vitamin B6 Metabolism	HMDB0001491	Meta_334	1.165	248.035	[M+H]+	Positive	61272.7	0	0	0	0	0	0	0	0	0	0	0	115247	846958	0	0	92758	0	0	112461	0	0	0	0	2586892	0	0	0	0	0	0	0	0	0	147851	328587	0	10760899	0	0
#N/A	Pyridoxamine	Cofactors and Vitamins	Vitamin B6 Metabolism	HMDB0001431	Meta_178	1.08	169.095	[M+H]+	Positive	27.24	5172181	5101489	622438	3196726	8007015	41855483	4418151	10829142	13669173	8241651	3813696	13656219	2565706	48076046	3904352	18933632	5105418	9206679	19209992	7459749	839486	9534633	12164790	10325498	41915606	9806436	11481702	2392831	26738606	12346186	4814558	11280737	5597996	14309628	4834414	5602217	2645455	131514	9132517
#N/A	Pyridoxate	Cofactors and Vitamins	Vitamin B6 Metabolism	HMDB0000017	Meta_213	3.159	182.045	[M-H]-	Negative_NH4HCO3	75.29	266810	1265516	23023	35251758	92759589	259214	461881	4539158	405847	49499	2682971	286025	545274	969543	184621	95203	363593	62393	498267	37623	6846179	270215	271456	328655	10200304	29240	24230	95137	905695	424049	28127	291582	108571	586607	181806	64227	84295	166874	22425
#N/A	Pyrocatechuic Acid	Amino Acid	Tyrosine Metabolism	HMDB0000397	Meta_139	4.189	153.018	[M-H]-	Negative_NH4HCO3	39.24	813998	647324	56886	2766711	1583690	65150	476500	1267167	97714	102686	3077224	2950961	1594980	89427	155679	44221	2586849	3599322	802925	25835	1782167	547392	161850	280446	3582870	93910	226347	2015396	1264906	134260	109006	182284	22698	86327	654119	21347	24587	0	576433
#N/A	Pyroglutamylleucine	Peptide	Dipeptide	HMDB0341382	Meta_314	3.234	241.119	[M-H]-	Negative_NH4HCO3	28.29	48670	22633	0	0	1379983	153625	24984	385045	170581	364762	24569	0	0	4990915	0	1416380	529090	0	49185	0	652595	534684	289073	65786	165953	20947	874475	49221	223442	828339	0	0	0	0	0	0	0	0	0
#N/A	Pyrrolidine	Xenobiotics	Natural Product/Food/Plant	HMDB0031641	Meta_3	1.066	72.0814	[M+H]+	Positive	302.79	2712958976	369879808	180244512	2028708736	2575159296	608211776	754953728	1578771840	1010897152	493678496	830171008	1553139840	59494780	4212477184	1481156224	1974131584	3145202432	656004992	1621325568	211352128	165452672	1760121856	1905819264	845639168	3708345600	1202077184	881453952	1376942208	934662208	2358850048	278254304	732214720	1124728704	115203768	1521166976	379560576	613095360	326940096	363835520
#N/A	Pyruvic Acid	Carbohydrate	Glycolysis, Gluconeogenesis, and Pyruvate Metabolism	HMDB0000243	Meta_10	1.251	87.0078	[M-H]-	Negative_FA	534.33	13312446	33808793	7575197	434019470	12678934	17571658	13198346	193046625	12947568	95885125	110197428	159323012	10650378	5856040	3971537	8366672	145830440	10559213	14251022	12850044	81231220	6746337	19768301	36062575	11974046	23437837	9142186	5816760	128524514	8793465	9174546	9357117	1163859470	7978239	20761593	8554682	2705479259	935407194	1219527
#N/A	Quinoline	Unclassified	Unclassified		Meta_83	5.825	130.065	[M+H]+	Positive	94.41	334748832	21254080	15188745	392114336	195302352	70960888	128418840	361335136	22868890	92158216	48305404	30955514	21840610	620209408	374061856	108263624	215698448	24533680	89317352	31373184	27520642	214652608	218405728	37888600	387581376	20921602	125123624	1032650752	79856944	384731264	29944702	438183104	12073109	11132254	635844864	34842848	54264320	5998530	14499069
#N/A	Riboflavin	Cofactors and Vitamins	Vitamin B2 Metabolism	HMDB0000244	Meta_466	4.475	377.146	[M+H]+	Positive	9.14	1524480	3918751	40612	1860590	12615619	1743375	0	1428865	1749852	66513	1279990	414513	1943155	11312651	400274	188613	189570	3391028	468084	1267901	590208	3992626	1499822	1298018	2917869	2010106	2416578	2139768	1113095	5470434	46994	4624118	582036	3742739	2751130	312426	1273902	115741	170670
#N/A	SM 14:0;2O/28:2	Unclassified	Unclassified		Meta_496	9.947	813.684	[M+H]+	Positive	243690	274304	3015440	0	62606	0	0	238667	63090	0	922614	0	280960	0	71210	0	1374437	0	3189829	2085062	0	0	198564	0	0	0	0	0	0	1810071	479043	0	0	778240	0	3093167	363149	0	66507	0
#N/A	SM 34:0;O2	Lipid	Sphingolipid Metabolism		Meta_488	10.149	705.591	[M+H]+	Positive	223733	5125003	762088	0	1496948	17012484	716947	0	820448	997087	54096	0	40191	0	2340140	0	2614042	548361	0	1805967	134032	1702526	676864	349880	2655695	2227436	83961	0	1132885	1919998	1146260	0	328737	0	0	0	76854	0	0	0
#N/A	SM 34:2;O2|SM 18:2;O2/16:0	Lipid	Sphingolipid Metabolism	HMDB0240638	Meta_486	9.258	701.559	[M+H]+	Positive	123816	1750522	0	54483	496244	4392294	940776	0	406886	248609	0	0	0	0	3461629	0	1529178	0	0	486222	0	503259	873329	0	262466	167037	0	0	688115	722309	360524	0	0	0	56724	0	0	0	0	0
#N/A	Salsolinol	Xenobiotics	Natural Product/Food/Plant	HMDB0042012	Meta_207	1.235	180.102	[M+H]+	Positive	273.24	0	134105	0	15735195	99661	788821	56494	496420	509233	2693736	739340	43055017	698659	65671	0	68378	212046	0	165525	160135	84953547	0	476494	59283	0	71118	124353	0	2388490	79505	0	53979	0	46291	420143	44093	96807	187403	881357
#N/A	Sarcosine	Amino Acid	Glycine, Serine and Threonine Metabolism	HMDB0000271	Meta_11	1.005	88.0392	[M-H]-	Negative_NH4HCO3	38.55	8974143	4627226	544004	4374100	9248647	3170172	5671820	28309450	30252307	637254	3612095	9402381	1012468	24938716	2512832	5664223	51827451	536061	5497717	2062920	713735	5533796	7433307	4549033	33377275	16518254	3996280	3714800	8680329	47041254	1252311	226877	5204763	1493099	3810889	2070302	11940881	5177962	2624260
#N/A	Sedoheptulose 7-Phosphate	Carbohydrate	Pentose phosphate pathway	HMDB0001068	Meta_404	0.918	289.037	[M-H]-	Negative_NH4HCO3	137.39	44193	265146	70989	0	0	0	43254	46402	71988	0	14131625	63573	0	53465	0	51262	71378	22800	85124	46575	9590343	0	0	0	0	71772	20253	0	87222	140750	0	22652	441364	96474	0	0	360960	1631676	35989
#N/A	Ser-Ile	Peptide	Dipeptide	HMDB0029042	Meta_284	5.724	219.134	[M+H]+	Positive	15.25	775433	148786	35845	1148210	467692	8769013	45079	754700	384202	622843	4556857	4398049	580554	93283	122428	53486	56560	1079626	3022114	3871492	168418	113472	599705	6151862	329690	169259	769133	368065	1015917	117509	121311	115515	163095	918623	136194	1519703	92120	29389	37784
#N/A	Ser-Pro	Unclassified	Unclassified		Meta_255	1.278	203.103	[M+H]+	Positive	115.19	5673806	7570964	2731142	35216628	4898422	82701616	57563432	57054456	16657058	61541072	27837440	79791208	1274476	16642348	3427656	11117315	44367708	659760	60039088	22861576	97177792	20700644	15542664	39640116	24644884	13015170	8379330	3667040	43317724	2647345	6281530	1814304	23063682	5939420	1046712	737854	2719225	3999122	22716696
#N/A	Skatole	Unclassified	Unclassified		Meta_84	5.751	130.065	[M-H]-	Negative_FA	87.84	25453126	631253	293107	56708830	19532208	11009558	20111740	21878379	38767	13353635	6355551	3711966	2235222	89174338	62614892	11510643	31981588	2353278	14107158	3092607	1317105	39473668	34644355	5089156	65091811	34277	19963982	180015938	8696184	36087361	4176391	79137639	115734	604958	83512559	3403434	2488514	22473	812964
#N/A	Spermidine	Amino Acid	Polyamine Metabolism	HMDB0001257	Meta_124	1.013	146.165	[M+H]+	Positive	409543	945756	167484	0	2487246	2438229	190873	479051	334448	68066544	0	597822	1301488	0	3888284	3330514	271934	3629500	0	291090	92028	0	991927	3916401	0	1920471	118796144	147194	2419472	1239606	653398	0	0	138275184	0	3330802	222760	3141525	18064150	0
#N/A	Sphinganine	Lipid	Sphingolipid Metabolism	HMDB0000269	Meta_425	7.576	302.305	[M+H]+	Positive	326750	1613381	263632	0	874149	19300594	640430	53709	336004	588002	102510	0	244495	0	2065119	0	2712852	671805	0	992352	50366	3299421	435598	402856	501911	1935313	234573	0	1479252	203927	623999	0	96386	0	40923	0	0	0	0	0
#N/A	Stachydrine	Xenobiotics	Natural Product/Food/Plant	HMDB0004827	Meta_115	1.217	144.102	[M+H]+	Positive	174.72	146716016	136166384	4709540	80276552	95830968	48121124	53762912	31570762	167349968	19075314	466882656	25224810	28351758	142975088	22237084	47157148	40395508	30601380	39290684	22478178	1054154048	24010976	48652552	27683764	32158072	216959456	24358184	33833076	1968780416	32894924	10698741	18204528	35073596	26702168	113119520	44655524	22677850	64886616	11255025
#N/A	Stearic Acid (C18:0)	Lipid	Long Chain Fatty Acid	HMDB0000827	Meta_394	9.256	283.264	[M-H]-	Negative_NH4HCO3	2595.49	452417680	326589331	311601125	375649841	729693781	375052414	293041483	396929160	309978440	310852410	288905306	343170055	285866436	679919929	295008413	546615587	378508583	278574197	409982250	304809525	419225277	470209507	307789971	386471057	552416610	264742951	281584833	703954255	561215582	441628163	281239079	342940304	280299238	280548405	288587552	281516803	271137644	255010254	275269771
#N/A	Stearoylcholine	Lipid	Fatty Acid Metabolism (Acyl Choline)	HMDB0240648	Meta_465	9.162	370.368	[M+H]+	Positive	146102	2137401	0	0	1672895	3470984	1665259	39350	1073696	496275	0	0	260490	0	3301313	0	0	0	0	1781576	770091	1161813	1376481	834150	1286095	0	56818	0	406260	0	0	0	455278	0	163360	0	128730	0	0	0
#N/A	Succinic Acid	Carbohydrate	Citrate cycle (TCA cycle)	HMDB0000254	Meta_49	0.884	117.018	[M-H]-	Negative_NH4HCO3	1426.1	4500445	249090316	7035034	5374152	65180846	61982163	346261160	71920828	17984208	47676528	741601923	735720054	988355	381727894	6315938	9341358	3041172817	1644312	248739576	4530306	2547452697	510577565	43096327	313957165	204701667	14220117	48732848	215698694	1902118489	289997680	17376783	5416541	614354456	12400132	4475330	4377025	455178144	423473058	15140619
#N/A	Succinylcarnitine (C4-DC)	Carbohydrate	Citrate cycle (TCA cycle)	HMDB0061717	Meta_365	1.325	262.128	[M+H]+	Positive	24.47	8391665	79033	680974	1949131	7456556	11255081	2163049	17302322	275342	8855483	22663774	7357243	1855651	8143220	2100445	2252777	11628485	956271	10729783	7458877	8758907	5444695	2070562	6827975	1692418	54536	7804145	7470554	2693558	2834350	183873	4961911	1415584	7777455	2740429	2091492	4592629	6464987	3229700
#N/A	Taurine	Amino Acid	Methionine, Cysteine, SAM and Taurine Metabolism	HMDB0000251	Meta_71	0.966	124.006	[M-H]-	Negative_NH4HCO3	415.26	130929364	154823089	126639599	50329472	144051031	64115501	81945898	50636689	555678602	46077471	16259950	51848753	37776018	76609188	78402388	184798115	128753425	36621951	43574505	30510210	4199616	47098149	97776933	33024843	102397894	467927425	96610329	4254086	99165708	51225979	26206745	166884946	114887425	41500117	55722427	28688752	23173486	21429351	35888526
#N/A	Taurocholic Acid	Lipid	Bile Acid, taurine conjungate	HMDB0000036	Meta_482	6.357	514.285	[M-H]-	Negative_FA	107350	113563	0	0	363318	361898	26641	22090	0	2617612	0	46995	31956	0	0	477739	0	20282	0	40319	0	0	0	280832	108668	0	2084535	0	19566	93135	22741	225549	0	0	0	751780	0	221676	0	0
#N/A	Taurodeoxycholic Acid	Lipid	Bile Acid, taurine conjungate	HMDB0000896	Meta_479	6.522	498.29	[M-H]-	Negative_FA	410624	3249105	144337	0	3903791	2664962	583107	1040183	0	5897660	0	498190	90214	1701922	960560	18266903	0	1188003	0	2909035	1638969	0	42958	9358448	1765974	0	4259254	0	180348	4518518	301807	7098572	0	0	61321	8839418	0	79136	33275	0
#N/A	Tetradecanedioate (C14-DC)	Lipid	Fatty Acid, Dicarboxylate	HMDB0000872	Meta_350	6.487	257.176	[M-H]-	Negative_FA	207047	6443786	10109873	421165	8312800	16778932	5263940	2439166	4377090	19449556	2908588	7799972	7042589	3131353	12489986	1518485	9818604	6832622	6736124	5030918	3104571	5800866	10494286	7047202	3560618	6351662	18450102	5825806	3040745	6711940	11763621	1486660	15331183	3934842	2826453	3680410	4828922	4824590	4217430	873928
#N/A	Tetradecylsulfate	Xenobiotics	Chemical		Meta_408	7.041	293.178	[M-H]-	Negative_FA	32459.2	197227267	38394697	2717913	42273068	11105274896	70171815	5316053	85004717	41997234	11135444	3454629	5912457	16131774	276844127	3848247	14777878	12259371	6664584	125769207	5708042	6472655	82585327	7469155	77124522	311293921	20189680	15498763	186513932	26401263	4435503	2225999	25882133	3078062	10020539	5719670	6739020	5061821	3364968	3347275
#N/A	Threonic Acid	Cofactors and Vitamins	Ascorbate and Aldarate Metabolism	HMDB0000943	Meta_100	0.93	135.029	[M-H]-	Negative_NH4HCO3	157.45	1423747	2771605	977670	623804	2390707	2614236	4388081	3485166	10064919	2448025	145467498	4034555	2449908	2368511	2247119	1866922	1882208	3269676	1326976	1750553	227719039	2725933	2543858	2097934	1753613	6036058	3687081	649122	5326767	809269	1126359	1715393	20154185	3074887	962332	2132849	1712312	2538101	1897763
#N/A	Thymidine	Nucleotide	Pyrimidine Metabolism, Thymine containing	HMDB0000273	Meta_313	1.822	241.083	[M-H]-	Negative_FA	37.15	10069685	191799	69339	1156023	44995596	3715689	312115	3540375	216874	290567	1245285	46779	3871125	37483904	0	884453	715257	361209	1890511	1902090	276353	1269156	1781457	941024	609564	1187442	1009413	656023	725432	501824	94393	192192	1938610	759626	146860	1525466	0	35030	207811
#N/A	Thymine	Nucleotide	Pyrimidine Metabolism, Thymine containing	HMDB0000262	Meta_75	1.605	127.05	[M+H]+	Positive	217.86	512563488	31451232	11764964	44680564	1543521920	46614296	18765464	162118640	56165604	11975337	51969724	17631470	101512784	2265805824	69995648	122978544	47344576	44026528	150599360	35682548	54336172	53337308	155711760	78334008	284086496	82332616	50104352	193300976	72404096	479288064	18556656	669885440	29851732	178973632	224199552	96405776	29224604	102685416	17369220
#N/A	Trigonelline (N'-Methylnicotinate)	Cofactors and Vitamins	Nicotinate and Nicotinamide Metabolism	HMDB0000875	Meta_107	1.258	138.046	[M+H]+	Positive	160.03	38894368	23007126	9066856	352019712	61326488	36721936	85904288	74961384	42535908	38029460	1175760896	69571576	44797776	200039072	12587452	12880493	58525820	43854852	139333552	13183669	2441071104	41077368	39424568	41232320	337784832	53524132	14237425	23116966	113002808	7035118	14965358	12884010	88365192	18947830	23502918	18501062	141169776	81458656	15171931
#N/A	Tryptamine	Amino Acid	Tryptophan Metabolism	HMDB0000303	Meta_156	3.938	161.107	[M+H]+	Positive	16.71	378852	0	0	82207	85762	47860	790080	0	292666	0	15762091	1012020	0	39469	1082369	65426	0	42481	55685	0	4397802	90365	2028535	0	554521	0	49268	162597	44398	249253	43038	0	22728	0	505822	43216	1105471	0	0
#N/A	Tyr-Gln	Unclassified	Unclassified		Meta_433	1.408	310.139	[M+H]+	Positive	309562	1261142	2336217	2117021	5054273	2194303	32286435	22633314	17405015	2448187	23246829	11508628	11185499	0	4285885	94533	3473298	31855493	45556	7460644	11706181	947747	7461743	4658376	15104097	165858	3240956	8324123	70140	5197480	341292	1898368	0	4687947	0	0	48804	2452019	2441564	899293
#N/A	Tyrosine O-sulfate	Amino Acid	Tyrosine Metabolism	HMDB0155722	Meta_356	1.447	260.023	[M-H]-	Negative_FA	197088	7752622	5036735	2111748	3345547	5529020	5999498	1855326	2830350	2939700	847206	3494299	3985011	2369053	12313789	244647	4552797	2136598	5858756	4819090	3900282	639079	2256741	2942730	7009406	5154902	4402036	1202225	275869	1010116	1847178	968300	3187847	7266845	6996619	848619	11767796	1773048	1047008	1398542
#N/A	Urate	Nucleotide	Purine Metabolism, (Hypo)Xanthine/Inosine containing	HMDB0000289	Meta_173	0.994	167.034	[M-H]-	Negative_NH4HCO3	1104.42	39709	33684566	1228090	56913358	40531632	188893155	313654188	480270	67761	369905598	70530642	274974923	308029870	96006491	128684190	21824008	59983026	31467635	405114887	256584151	59427315	154834039	100637276	646701831	162682989	53270	308589492	162919	55553600	1411562	139998429	27588984	2786014	110921557	761529	78396922	56250716	0	166634084
#N/A	Urea	Amino Acid	Urea cycle; Arginine and Proline Metabolism	HMDB0000294	Meta_1	1.225	61.0404	[M+H]+	Positive	244.52	30712355	486173808	358956525	335490236	49926575	5769021405	1888611802	133851228	89218528	4066493576	727341426	1860513324	272609647	113432737	144301836	25183283	131850084	235946655	173312831	3379761610	1026671872	120421098	1524652520	5546422249	36686825	451972788	1721757606	37530991	562043448	27472153	2608661078	42383751	215208134	485299683	45190905	177626931	484503330	336823246	177300473
#N/A	Uridine	Nucleotide	Pyrimidine Metabolism, Uracil containing	HMDB0000296	Meta_319	1.293	243.062	[M-H]-	Negative_NH4HCO3	47.03	796857	27081	20517	126246	800497	27813	0	0	1681202	47058	26910	67984	341815	1547222	22427	154957	255734	0	203495	46031	32726	218042	133637	25856	95601	1063019	28045	93456	874224	137392	0	0	18049604	0	169694	0	0	25563	0
#N/A	Urocanate	Amino Acid	Histidine Metabolism	HMDB0062562	Meta_108	1.291	139.05	[M+H]+	Positive	209.12	46354324	521983392	55230504	304036512	72056504	343141632	123966448	201231744	92240104	72043360	299616032	98495080	133789184	400598080	42379552	68069256	215147392	34077244	119929504	153182832	188510064	255523472	129382304	116396096	52220132	143270176	341346304	5639658	160875312	17252444	52848024	32173732	149641232	122745632	14696235	149884304	80149120	125838720	112929464
#N/A	Valerophenone	Unclassified	Unclassified		Meta_163	6.729	163.111	[M+H]+	Positive	32.24	1836084	1541694	1235778	581052	14658424	1812305	1031896	2890180	2655968	886821	1370220	1029130	677439	509986	1613425	1879832	876615	1209301	2496189	2596059	2488822	692830	1097608	1942434	1840113	1733308	923307	2041471	1264579	3787433	886277	5035373	455067	1821123	1593893	555908	1487201	210825	1870823
#N/A	Vitamin K1	Cofactors and Vitamins	Vitamin K Metabolism	HMDB0003555	Meta_294	6.289	226.18	[M+H]+	Positive	28828.5	29880826	17625372	16552011	35026844	34355292	45063948	19205986	22505580	21670174	24294490	30753676	23692484	56986356	74874472	15583376	18929814	17809266	21582696	23364092	23600698	28737684	28134676	40153932	40542944	23854242	25046264	39855464	30188868	28449152	30755150	13547427	19752490	76413784	29942954	22221402	25605418	21064950	26393116	14255799
#N/A	cAMP	Nucleotide	Purine Metabolism, Adenine containing	HMDB0000058	Meta_449	1.29	330.06	[M+H]+	Positive	800501	510249	281590	0	5841572	147734	1367579	24949639	438580	3293239	4797892	10493425	29790003	5982581	0	1152862	0	0	108505	0	17187656	40362025	1784366	257825	21838151	0	3958443	0	0	197134	0	3455735	51326	16664049	46268	56354	155826	1988669	4204705	0
#N/A	lithocholic acid	Lipid	Bile Acid	HMDB0000761	Meta_458	6.78	359.298	[M+H-H2O]+	Positive	298115	4638212	4747089	272865	701317	4362624	2793704	33058	1098977	1228404	330433	0	212892	2559365	12933144	461157	984792	348819	1846095	2066484	3510605	158261	2775958	1023775	1388872	287970	402406	2985496	10664391	4774751	2557445	686349	7432580	0	2619081	1629969	2410893	54277	0	521628
#N/A	taxifolin	Unclassified	Unclassified		Meta_427	5.183	303.051	[M-H]-	Negative_FA	21358.9	0	0	0	11945702	22065	0	0	0	0	0	3545701	181594	17188	0	0	0	0	1378880	0	0	44740	0	0	0	0	18828	0	0	19796	0	27887	0	0	0	19772	0	0	0	0
[truncated: 37 more columns]
